# Supplementary material for: Asymmetric construction of fluorinated imidazolidines via Cu(i)-catalyzed exo′-selective 1,3-dipolar cycloaddition of azomethine ylides with fluorinated imines
Source: Royal Society of Chemistry journal article supplement (doi:10.1039/c3cc43025a), 2013-01-01
Supplement: c3cc43025a.pdf [file c3cc43025a.pdf]

*Supporting Information for*

**Asymmetric Construction of Fluorinated Imidazolidines via  
Cu(I)-Catalyzed *exo'*-Selective 1,3-Dipolar Cycloaddition of  
Azomethine Ylides with Fluorinated Imines**

Qing-Hua Li, Liang Wei, Xuan Chen and Chun-Jiang Wang\*

Table of Contents

|       |                                                                                                                                                                  |          |
|-------|------------------------------------------------------------------------------------------------------------------------------------------------------------------|----------|
| I.    | General Remarks.....                                                                                                                                             | S2       |
| II.   | Ligand Screening for Asymmetric 1,3-Dipolar Cycloaddition of Azomethine Ylides with Fluorinated Imines.....                                                      | S2-S3    |
| III.  | General Procedure for the Synthesis of Racemic Cycloadducts.....                                                                                                 | S3       |
| IV.   | General Procedure for Asymmetric 1,3-Dipolar Cycloaddition of Azomethine Ylides with Fluorinated Imines.....                                                     | S4-22    |
| V.    | Synthetic Transformations.....                                                                                                                                   | S22-24   |
| VI.   | Linear Effect for the 1,3-DC of Trifluoromethylated Imine <b>1a</b> with Imino Ester <b>2a</b> Catalyzed by Cu(I)/( <i>S,R<sub>p</sub></i> )-PPFOMe Complex..... | S24-25   |
| VII.  | Proposed Transition States of the <i>exo'</i> -Selectivity for Asymmetric 1,3-Dipolar Cycloaddition of Imino Esters with Fluorinated Imines.....                 | S25-26   |
| VIII. | References.....                                                                                                                                                  | S26      |
| IX.   | <sup>1</sup> H NMR and <sup>13</sup> C NMR Spectra.....                                                                                                          | S27-94   |
| X.    | HPLC Chromatograms.....                                                                                                                                          | S95-S162 |

## I. General Remarks

$^1\text{H}$  NMR spectra were recorded on a VARIAN Mercury 300 MHz or Bruker 400 MHz spectrometer in  $\text{CDCl}_3$ . Chemical shifts are reported in ppm with the internal TMS signal at 0.0 ppm as a standard. The data are reported as (s = single, d = double, t = triple, q = quartet, m = multiple or unresolved, and brs = broad single).  $^{13}\text{C}$  NMR spectra were recorded on a Bruker 100 MHz or 75 MHz spectrometer in  $\text{CDCl}_3$  or  $\text{DMSO-d}_6$ . Chemical shifts are reported in ppm with the internal chloroform signal at 77.0 ppm as a standard. Commercially available reagents were used without further purification. All reactions were monitored by TLC with silica gel-coated plates. Diastereomeric ratios were determined from crude  $^1\text{H}$  NMR or HPLC analysis. Enantiomeric ratios were determined by HPLC, using a chiralpak AD-H column, a chiralpak AS-H column or a chiralcel OD-H column with hexane and *i*-PrOH as solvents, or determined by GC using  $\beta$ -dex 325 column. Chiral ligand (*S,R*<sub>p</sub>)-PPFOMe and Fluorinated imines was prepared according to the literature procedure.<sup>1,2</sup> The racemic adducts were obtained by using AgOAc/ $\text{PPh}_3$  as the catalyst. The absolute configuration of (2*R*,4*R*,5*R*)-**3s** was determined unequivocally according to the X-ray diffraction analysis, and those of other adducts were deduced on the basis of these results.

## II. Ligand Screening for Asymmetric 1,3-Dipolar Cycloaddition of Azomethine Ylides with Fluorinated Imines

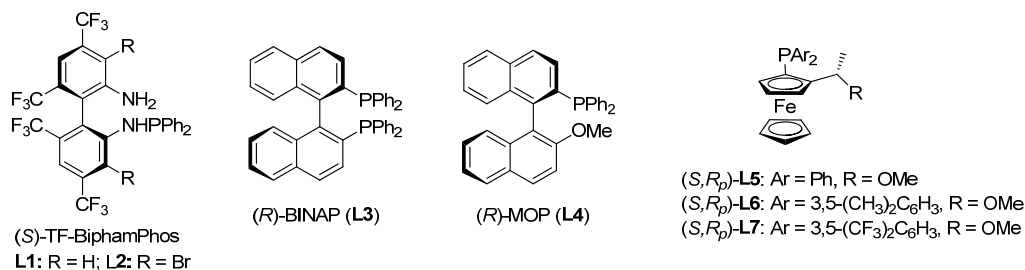

Figure 1. Screened chiral ligands.

**Table 1.** Optimization for catalytic asymmetric 1,3-dipolar cycloaddition of imino ester **2a** with trifluoromethylated imine **1a**<sup>a</sup>

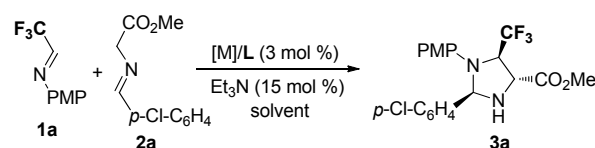

| Entry           | L  | [M] <sup>b</sup>  | Solvent | Temp.<br>(°C) | Time<br>(min) | yield <sup>c</sup><br>(%) | dr <sup>d</sup> | ee <sup>e</sup><br>(%) |
|-----------------|----|-------------------|---------|---------------|---------------|---------------------------|-----------------|------------------------|
| 1               | L1 | AgOAc             | DCM     | rt            | 10            | 85                        | 93:7            | 23                     |
| 2               | L1 | CuBF <sub>4</sub> | DCM     | rt            | 10            | 88                        | 91:9            | 35                     |
| 3               | L2 | AgOAc             | DCM     | rt            | 10            | 80                        | 83:17           | 33                     |
| 4               | L2 | CuBF <sub>4</sub> | DCM     | rt            | 10            | 82                        | 62:38           | 71                     |
| 5               | L3 | AgOAc             | DCM     | rt            | 60            | 75                        | 86:14           | 16                     |
| 6               | L3 | CuBF <sub>4</sub> | DCM     | rt            | 60            | 85                        | 39:61           | 80                     |
| 7               | L4 | AgOAc             | DCM     | rt            | 10            | 86                        | 98:2            | 55                     |
| 8               | L4 | CuBF <sub>4</sub> | DCM     | rt            | 10            | 88                        | 98:2            | 55                     |
| 9               | L5 | AgOAc             | DCM     | rt            | 10            | 90                        | 98:2            | 77                     |
| 10              | L5 | CuBF <sub>4</sub> | DCM     | rt            | 10            | 95                        | 85:15           | 91                     |
| 11 <sup>f</sup> | L5 | CuBF <sub>4</sub> | DCM     | rt            | 10            | 95                        | 87:13           | 90                     |
| 12              | L6 | CuBF <sub>4</sub> | DCM     | rt            | 10            | 92                        | 83:17           | 93                     |
| 13              | L7 | CuBF <sub>4</sub> | DCM     | rt            | 10            | 94                        | 65:32           | 72                     |
| 14              | L5 | CuBF <sub>4</sub> | PhMe    | rt            | 10            | 90                        | 94:6            | 93                     |
| 15              | L5 | CuBF <sub>4</sub> | THF     | rt            | 10            | 93                        | 95:5            | 92                     |
| 16              | L5 | CuBF <sub>4</sub> | EtOAc   | rt            | 10            | 93                        | 95:5            | 93                     |
| 17              | L5 | CuBF <sub>4</sub> | MeOH    | rt            | 10            | 90                        | 88:12           | 86                     |
| 18              | L5 | CuBF <sub>4</sub> | ether   | rt            | 10            | 94                        | 96:4            | 94                     |
| 19              | L5 | CuBF <sub>4</sub> | MeOH    | -20           | 60            | 92                        | 98:2            | 95                     |
| 20              | L5 | CuBF <sub>4</sub> | ether   | -20           | 60            | 93                        | 98:2            | 97                     |
| 21 <sup>g</sup> | L5 | CuBF <sub>4</sub> | ether   | -20           | 120           | 90                        | 98:2            | 97                     |

<sup>a</sup> All reactions were carried out with 0.35 mmol of **2a** and 0.23 mmol of **1a** in 2 mL of solvent. <sup>b</sup> CuBF<sub>4</sub> = Cu(CH<sub>3</sub>CN)<sub>4</sub>BF<sub>4</sub>. <sup>c</sup> Isolated yield. <sup>d</sup> dr was determined by the crude <sup>1</sup>H NMR and HPLC analysis. <sup>e</sup> ee was determined by chiral HPLC analysis. <sup>f</sup> CuBF<sub>4</sub> is 3 mol % and **L5** is 6.6 mol %. <sup>g</sup> 1 mol % catalyst loading.

### III. General Procedure for the Synthesis of Racemic Cycloadducts.

Under argon atmosphere, PPh<sub>3</sub> (6.6 mg, 0.025 mmol) and AgOAc (3.8 mg, 0.023 mmol) were dissolved in 2 mL of DCM, and stirred at room temperature for about 0.5 h. Then, imine substrate (0.35 mmol), Et<sub>3</sub>N (0.03 mmol) and fluorinated imines (0.23 mmol) were added sequentially. Once starting material was consumed (monitored by TLC), the organic solvent was removed and the residue was purified by column chromatography to give the cycloaddition product, which was used as the racemic sample for the HPLC analysis.

#### IV. General Procedure for Asymmetric 1,3-Dipolar Cycloaddition of Azomethine Ylides with Fluorinated Imines.

Under argon atmosphere, (*S,R<sub>p</sub>*)-PPFOMe (**L5**) (3.3 mg, 0.0077 mmol) and Cu(CH<sub>3</sub>CN)<sub>4</sub>BF<sub>4</sub> (2.2 mg, 0.007 mmol) were dissolved in 2 mL of ether, and stirred at room temperature for about 0.5 h. After imine substrate (0.35 mmol) was added, the mixture was dropped to -20 °C. Then, fluorinated imines (0.23 mmol) and Et<sub>3</sub>N (0.03 mmol) was added sequentially. Once starting material was consumed (monitored by TLC), the mixture was filtered through celite and the filtrate was concentrated to dryness. The residue was purified by column chromatography to give the corresponding cycloaddition product, which was then directly analyzed by HPLC analysis to determine the enantiomeric excess.

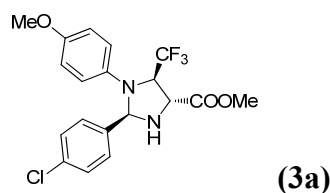

#### **(2*R*,4*R*,5*R*)-methyl 2-(4-chlorophenyl)-1-(4-methoxyphenyl)-5-(trifluoromethyl)imidazolidine-4-carboxylate**

The title compound was prepared according to the general procedure as described above in 95% yield;  $[\alpha]_D^{25} = -44.2$  (*c* 0.97, CHCl<sub>3</sub>); <sup>1</sup>H NMR (CDCl<sub>3</sub>, TMS, 300 MHz) δ 7.49 (d, *J* = 8.1 Hz, 2H), 7.35 (d, *J* = 8.1 Hz, 2H), 6.76 (d, *J* = 8.4 Hz, 2H), 6.67 (d, *J* = 8.4 Hz, 2H), 5.40 (s, 1H), 4.62 (q, *J* = 6.6 Hz, 1H), 4.32 (s, 1H), 3.79 (s, 3H), 3.72 (s, 3H), 2.66 (brs, 1H); <sup>13</sup>C NMR (CDCl<sub>3</sub>, TMS, 100 MHz) δ 170.4, 154.0, 139.5, 137.5, 134.7, 129.2, 128.1, 125.8 (q, *J* = 280.6 Hz), 117.2, 114.5, 81.2, 65.5 (q, *J* = 30.6 Hz), 60.5, 55.4, 53.0; IR (KBr) ν 3340, 2953, 2845, 1742, 1513, 1450, 1346, 1260, 1175, 1134, 1036, 931, 815, 680, 590 cm<sup>-1</sup>. The product was analyzed by HPLC to determine the enantiomeric excess: 97% ee (Chiralpak AD-H, *i*-propanol/hexane = 10/90, flow rate 1.0 mL/min, λ = 220 nm); t<sub>r</sub> = 9.49 and 11.47 min.

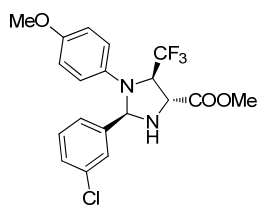

**(3b)**

**(2R,4R,5R)-methyl 2-(3-chlorophenyl)-1-(4-methoxyphenyl)-5-(trifluoromethyl)imidazolidine-4-carboxylate**

The title compound was prepared according to the general procedure as described above in 85% yield.  $[\alpha]_D^{25} = -42.0$  ( $c$  0.29,  $\text{CHCl}_3$ );  $^1\text{H}$  NMR ( $\text{CDCl}_3$ , TMS, 400 MHz)  $\delta$  7.54 (s, 1H), 7.44-7.42 (m, 1H), 7.32-7.31 (m, 2H), 6.77 (d,  $J = 9.2$  Hz, 2H), 6.69 (d,  $J = 9.2$  Hz, 2H), 5.40 (s, 1H), 4.61 (q,  $J = 6.8$  Hz, 1H), 4.31 (s, 1H), 3.79 (s, 3H), 3.72 (s, 3H);  $^{13}\text{C}$  NMR ( $\text{CDCl}_3$ , TMS, 100 MHz)  $\delta$  170.4, 154.1, 141.1, 139.5, 134.8, 130.3, 129.1, 126.9, 125.7 (q,  $J = 280.8$  Hz), 124.8, 117.3, 114.6, 81.3, 65.6 (q,  $J = 30.6$  Hz), 60.5, 55.4, 53.0; IR (KBr)  $\nu$  3318, 2948, 2920, 2815, 1750, 1517, 1395, 1251, 1138, 1036, 950, 759, 590  $\text{cm}^{-1}$ . HRMS: calcd. for  $\text{C}_{19}\text{H}_{18}\text{ClF}_3\text{N}_2\text{O}_3 + \text{H}^+$ : 415.1031, found: 415.1037. The product was analyzed by HPLC to determine the enantiomeric excess: 94% ee (Chiralpak AS-H, *i*-propanol/hexane = 10/90, flow rate 1.0 mL/min,  $\lambda = 220$  nm);  $t_r = 7.81$  and 11.19 min.

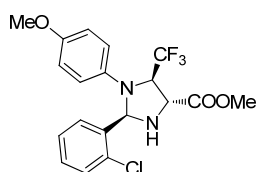

**(3c)**

**(2R,4R,5R)-methyl 2-(2-chlorophenyl)-1-(4-methoxyphenyl)-5-(trifluoromethyl)imidazolidine-4-carboxylate**

The title compound was prepared according to the general procedure as described above in 80% yield.  $[\alpha]_D^{25} = +15.1$  ( $c$  1.37,  $\text{CHCl}_3$ );  $^1\text{H}$  NMR ( $\text{CDCl}_3$ , TMS, 300 MHz)  $\delta$  7.62-7.60 (m, 1H), 7.45-7.42 (m, 1H), 7.31-7.23 (m, 2H), 6.76 (d,  $J = 9.0$  Hz, 2H), 6.63 (d,  $J = 9.0$  Hz, 2H), 5.85 (s, 1H), 4.60 (q,  $J = 6.9$  Hz, 1H), 4.32 (s, 1H), 3.79 (s, 3H), 3.71 (s, 3H), 2.78 (brs, 1H);  $^{13}\text{C}$  NMR ( $\text{CDCl}_3$ , TMS, 100 MHz)  $\delta$  170.6, 153.8, 139.4, 136.3, 133.5, 130.0, 129.9, 127.7, 127.4, 125.7 (q,  $J = 280.9$  Hz), 116.6, 114.6, 78.0, 65.4 (q,  $J = 30.9$  Hz), 60.4, 55.4, 53.0; IR (KBr)  $\nu$  3319, 2910, 2834,

1744, 1510, 1390, 1252, 1157, 1143, 1030, 955, 750, 591  $\text{cm}^{-1}$ . The product was analyzed by HPLC to determine the enantiomeric excess: 93% ee (Chiralpak AS-H, *i*-propanol/hexane = 10/90, flow rate 1.0 mL/min,  $\lambda$  = 220 nm);  $t_r$  = 7.58 and 8.47 min.

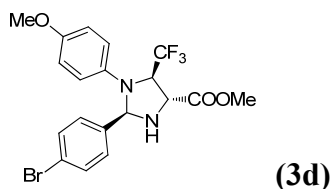

**(2R,4R,5R)-methyl 2-(4-bromophenyl)-1-(4-methoxyphenyl)-5-(trifluoromethyl)imidazolidine-4-carboxylate**

The title compound was prepared according to the general procedure as described above in 94% yield.  $[\alpha]_D^{25} = -56.2$  (*c* 0.96,  $\text{CHCl}_3$ );  $^1\text{H}$  NMR ( $\text{CDCl}_3$ , TMS, 400 MHz)  $\delta$  7.51 (d,  $J$  = 8.4 Hz, 2H), 7.42 (d,  $J$  = 8.4 Hz, 2H), 6.76 (d,  $J$  = 9.2 Hz, 2H), 6.67 (d,  $J$  = 9.2 Hz, 2H), 5.39 (s, 1H), 4.61 (q,  $J$  = 6.8 Hz, 1H), 4.31 (s, 1H), 3.79 (s, 3H), 3.72 (s, 3H), 2.66 (brs, 1H);  $^{13}\text{C}$  NMR ( $\text{CDCl}_3$ , TMS, 100 MHz)  $\delta$  170.4, 154.0, 139.5, 138.0, 132.1, 128.4, 125.7 (q,  $J$  = 280.7 Hz), 122.8, 117.2, 114.6, 81.2, 65.6 (q,  $J$  = 30.6 Hz), 60.5, 55.4, 53.0; IR (KBr)  $\nu$  3340, 2950, 2840, 1714, 1522, 1460, 1251, 1134, 1050, 928, 816, 746, 588  $\text{cm}^{-1}$ . The product was analyzed by HPLC to determine the enantiomeric excess: 97% ee (Chiralpak AS-H, *i*-propanol/hexane = 10/90, flow rate 1.0 mL/min,  $\lambda$  = 220 nm);  $t_r$  = 10.01 and 12.77 min.

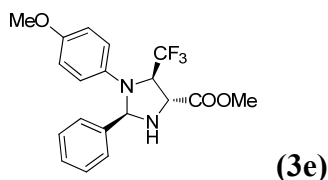

**(2R,4R,5R)-methyl 1-(4-methoxyphenyl)-2-phenyl-5-(trifluoromethyl)imidazolidine-4-carboxylate**

The title compound was prepared according to the general procedure as described above in 90% yield.  $[\alpha]_D^{25} = -35.6$  (*c* 1.35,  $\text{CHCl}_3$ );  $^1\text{H}$  NMR ( $\text{CDCl}_3$ , TMS, 400 MHz)  $\delta$  7.54 (d,  $J$  = 7.2 Hz, 2H), 7.40-7.33 (m, 3H), 6.75 (d,  $J$  = 9.2 Hz, 2H), 6.69 (d,  $J$  =

9.2 Hz, 2H), 5.43 (s, 1H), 4.63 (q,  $J = 7.2$  Hz, 1H), 4.32 (s, 1H), 3.78 (s, 3H), 3.71 (s, 3H), 2.69 (brs, 1H);  $^{13}\text{C}$  NMR ( $\text{CDCl}_3$ , TMS, 100 MHz)  $\delta$  170.5, 153.7, 139.8, 139.0, 129.0, 128.9, 126.6, 125.9 (q,  $J = 280.8$  Hz), 116.9, 114.5, 81.8, 65.5 (q,  $J = 30.6$  Hz), 60.6, 55.5, 53.0; IR (KBr)  $\nu$  3365, 2950, 2847, 1750, 1514, 1422, 1366, 1240, 1138, 1036, 930, 823, 701, 620  $\text{cm}^{-1}$ . The product was analyzed by HPLC to determine the enantiomeric excess: 95% ee (Chiralpak AS-H, *i*-propanol/hexane = 10/90, flow rate 1.0 mL/min,  $\lambda = 220$  nm);  $t_r = 7.85$  and 11.61 min.

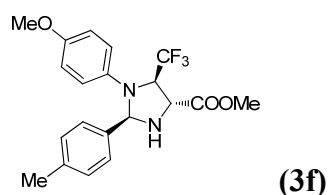

**(2R,4R,5R)-methyl 1-(4-methoxyphenyl)-2-(p-tolyl)-5-(trifluoromethyl)imidazolidine-4-carboxylate**

The title compound was prepared according to the general procedure as described above in 91% yield.  $[\alpha]_D^{25} = -49.6$  ( $c$  1.37,  $\text{CHCl}_3$ );  $^1\text{H}$  NMR ( $\text{CDCl}_3$ , TMS, 400 MHz)  $\delta$  7.43 (d,  $J = 7.6$  Hz, 2H), 7.18 (d,  $J = 7.6$  Hz, 2H), 6.75 (d,  $J = 9.2$  Hz, 2H), 6.69 (d,  $J = 9.2$  Hz, 2H), 5.40 (s, 1H), 4.63 (q,  $J = 6.8$  Hz, 1H), 4.31 (s, 1H), 3.78 (s, 3H), 3.71 (s, 3H), 2.69 (brs, 1H), 2.34 (s, 3H);  $^{13}\text{C}$  NMR ( $\text{CDCl}_3$ , TMS, 100 MHz)  $\delta$  170.5, 153.6, 139.9, 138.7, 136.0, 129.6, 126.5, 125.9 (q,  $J = 280.9$  Hz), 116.8, 114.5, 81.6, 65.4 (q,  $J = 30.5$  Hz), 60.6, 55.4, 52.9, 21.1; IR (KBr)  $\nu$  3318, 2930, 2847, 1742, 1513, 1450, 1379, 1138, 1039, 960, 817, 755, 590  $\text{cm}^{-1}$ . The product was analyzed by HPLC to determine the enantiomeric excess: 97% ee (Chiralpak AS-H, *i*-propanol/hexane = 10/90, flow rate 1.0 mL/min,  $\lambda = 220$  nm);  $t_r = 8.03$  and 9.95 min.

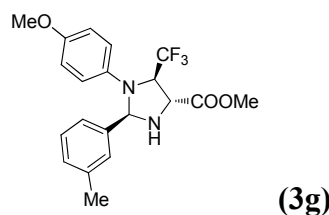

**(2R,4R,5R)-methyl 1-(4-methoxyphenyl)-2-(m-tolyl)-5-(trifluoromethyl)imidazolidine-4-carboxylate**

The title compound was prepared according to the general procedure as described above in 85% yield.  $[\alpha]_D^{25} = -38.9$  ( $c$  0.85,  $\text{CHCl}_3$ );  $^1\text{H}$  NMR ( $\text{CDCl}_3$ , TMS, 400 MHz)  $\delta$  7.35-7.33 (m, 2H), 7.28-7.24 (m, 1H), 7.16 (d,  $J = 7.6$  Hz, 1H), 6.76 (d,  $J = 9.2$  Hz, 2H), 6.69 (d,  $J = 9.2$  Hz, 2H), 5.38 (s, 1H), 4.64 (q,  $J = 6.8$  Hz, 1H), 4.31 (s, 1H), 3.78 (s, 3H), 3.71 (s, 3H), 2.35 (s, 3H);  $^{13}\text{C}$  NMR ( $\text{CDCl}_3$ , TMS, 100 MHz)  $\delta$  170.5, 153.6, 139.9, 138.9, 138.6, 129.6, 128.9, 127.3, 125.9 (q,  $J = 283.7$  Hz), 123.5, 116.8, 114.5, 81.8, 65.4 (q,  $J = 30.5$  Hz), 60.6, 55.4, 52.9, 21.4; IR (KBr)  $\nu$  3345, 2930, 2832, 1747, 1513, 1364, 1217, 1168, 1137, 1040, 961, 812, 756, 588  $\text{cm}^{-1}$ . HRMS: calcd. for  $\text{C}_{20}\text{H}_{21}\text{F}_3\text{N}_2\text{O}_3 + \text{H}^+$ : 395.1577, found: 395.1579. The product was analyzed by HPLC to determine the enantiomeric excess: 92% ee (Chiralpak AS-H, *i*-propanol/hexane = 10/90, flow rate 1.0 mL/min,  $\lambda = 220$  nm);  $t_r = 7.00$  and 10.68 min.

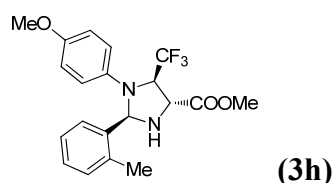

**(2R,4R,5R)-methyl 1-(4-methoxyphenyl)-2-(o-tolyl)-5-(trifluoromethyl)imidazolidine-4-carboxylate**

The title compound was prepared according to the general procedure as described above in 82% yield.  $[\alpha]_D^{25} = -48.1$  ( $c$  1.35,  $\text{CHCl}_3$ );  $^1\text{H}$  NMR ( $\text{CDCl}_3$ , TMS, 400 MHz)  $\delta$  7.54-7.52 (m, 1H), 7.33-7.23 (m, 2H), 7.18-7.17 (m, 1H), 6.75 (d,  $J = 9.2$  Hz, 2H), 6.59 (d,  $J = 9.2$  Hz, 2H), 5.59 (s, 1H), 4.59 (q,  $J = 6.8$  Hz, 1H), 4.32 (s, 1H), 3.77 (s, 3H), 3.71 (s, 3H), 2.57 (s, 3H), 2.53 (brs, 1H);  $^{13}\text{C}$  NMR ( $\text{CDCl}_3$ , TMS, 100 MHz)  $\delta$  170.5, 153.7, 139.9, 138.7, 136.0, 129.6, 126.5, 125.9 (q,  $J = 280.9$  Hz), 116.8, 114.5, 81.6, 65.4 (q,  $J = 30.5$  Hz), 60.6, 55.5, 53.0, 21.2; IR (KBr)  $\nu$  3319, 2948, 2926, 1742, 1513, 1449, 1381, 1208, 1165, 1135, 1039, 931, 817, 750, 589  $\text{cm}^{-1}$ . HRMS: calcd. for  $\text{C}_{20}\text{H}_{21}\text{F}_3\text{N}_2\text{O}_3 + \text{H}^+$ : 395.1577, found: 395.1575. The product was analyzed by HPLC to determine the enantiomeric excess: 96% ee (Chiralpak AS-H, *i*-propanol/hexane = 10/90, flow rate 1.0 mL/min,  $\lambda = 220$  nm);  $t_r = 8.03$  and 9.93 min.



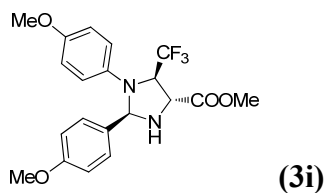

**(2*R*,4*R*,5*R*)-methyl 1,2-bis(4-methoxyphenyl)-5-(trifluoromethyl)imidazolidine-4-carboxylate**

The title compound was prepared according to the general procedure as described above in 88% yield.  $[\alpha]_D^{25} = -50.6$  ( $c$  1.56,  $\text{CHCl}_3$ );  $^1\text{H}$  NMR ( $\text{CDCl}_3$ , TMS, 400 MHz)  $\delta$  7.46 (d,  $J = 8.8$  Hz, 2H), 6.90 (d,  $J = 8.8$  Hz, 2H), 6.75 (d,  $J = 9.2$  Hz, 2H), 6.69 (d,  $J = 9.2$  Hz, 2H), 5.37 (s, 1H), 4.62 (q,  $J = 7.6$  Hz, 1H), 4.31 (s, 1H), 3.80 (s, 3H), 3.78 (s, 3H), 3.71 (s, 3H), 2.65 (brs, 1H);  $^{13}\text{C}$  NMR ( $\text{CDCl}_3$ , TMS, 100 MHz)  $\delta$  170.5, 159.9, 153.7, 139.9, 131.0, 127.9, 125.9 (q,  $J = 280.8$  Hz), 117.0, 114.5, 114.2, 81.4, 65.4 (q,  $J = 30.5$  Hz), 60.5, 55.4, 55.2, 52.9; IR (KBr)  $\nu$  3380, 2960, 2831, 1742, 1513, 1451, 1383, 1249, 1169, 1135, 1036, 931, 840, 690, 593  $\text{cm}^{-1}$ . The product was analyzed by HPLC to determine the enantiomeric excess: 97% ee (Chiralpak AS-H, *i*-propanol/hexane = 10/90, flow rate 1.0 mL/min,  $\lambda = 220$  nm);  $t_r = 12.73$  and 16.73 min.

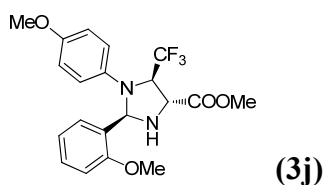

**(2*R*,4*R*,5*R*)-methyl 2-(2-methoxyphenyl)-1-(4-methoxyphenyl)-5-(trifluoromethyl)imidazolidine-4-carboxylate**

The title compound was prepared according to the general procedure as described above in 76% yield.  $[\alpha]_D^{25} = +4.7$  ( $c$  0.58,  $\text{CHCl}_3$ );  $^1\text{H}$  NMR ( $\text{CDCl}_3$ , TMS, 400 MHz)  $\delta$  7.49 (d,  $J = 7.6$  Hz, 1H), 7.33-7.31 (m, 1H), 6.95-6.93 (m, 2H), 6.75 (d,  $J = 8.8$  Hz, 2H), 6.65 (d,  $J = 8.8$  Hz, 2H), 5.84 (s, 1H), 4.59 (q,  $J = 6.8$  Hz, 1H), 4.32 (s, 1H), 3.94 (s, 3H), 3.78 (s, 3H), 3.71 (s, 3H);  $^{13}\text{C}$  NMR ( $\text{CDCl}_3$ , TMS, 100 MHz)  $\delta$  170.7, 157.2, 153.5, 139.9, 129.8, 126.8, 126.6, 125.8 (q,  $J = 280.9$  Hz), 121.1, 116.5, 114.4, 110.5, 75.6, 65.2 (q,  $J = 30.7$  Hz), 60.5, 55.6, 55.4, 52.9; IR (KBr)  $\nu$  3340, 2956, 2928, 1741,

1513, 1446, 1388, 1252, 1202, 1176, 1134, 931, 1036, 817, 699, 585  $\text{cm}^{-1}$ . The product was analyzed by HPLC to determine the enantiomeric excess: 96% ee (Chiralpak AS-H, *i*-propanol/hexane = 10/90, flow rate 1.0 mL/min,  $\lambda$  = 220 nm);  $t_r$  = 10.27 and 15.63 min.

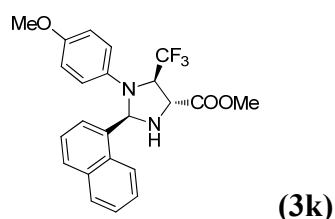

**(2*R*,4*R*,5*R*)-methyl 1-(4-methoxyphenyl)-2-(naphthalen-1-yl)-5-(trifluoromethyl)imidazolidine-4-carboxylate**

The title compound was prepared according to the general procedure as described above in 85% yield.  $[\alpha]_D^{25} = -58.4$  (*c* 1.42,  $\text{CHCl}_3$ );  $^1\text{H}$  NMR ( $\text{CDCl}_3$ , TMS, 400 MHz)  $\delta$  8.47 (d,  $J$  = 8.8 Hz, 1H), 7.91 (d,  $J$  = 8.0 Hz, 1H), 7.85 (d,  $J$  = 8.4 Hz, 1H), 7.74 (d,  $J$  = 7.6 Hz, 1H), 7.63-7.61 (m, 1H), 7.57-7.55 (m, 1H), 7.44-7.41 (m, 1H), 6.72 (d,  $J$  = 9.2 Hz, 2H), 6.62 (d,  $J$  = 9.2 Hz, 2H), 6.20 (s, 1H), 4.68 (q,  $J$  = 6.8 Hz, 1H), 4.38 (s, 1H), 3.83 (s, 3H), 3.69 (s, 3H);  $^{13}\text{C}$  NMR ( $\text{CDCl}_3$ , TMS, 100 MHz)  $\delta$  170.6, 153.4, 139.8, 133.9, 133.5, 130.9, 129.2, 128.5, 126.6, 125.90, 125.86 (q,  $J$  = 281.0 Hz), 125.8, 124.0, 123.3, 116.2, 114.5, 78.8, 65.3 (q,  $J$  = 30.7 Hz), 60.5, 55.4, 52.9; IR (KBr)  $\nu$  3328, 2956, 1743, 1515, 1425, 1250, 1134, 1037, 929, 817, 763, 669, 588  $\text{cm}^{-1}$ . HRMS: calcd. for  $\text{C}_{23}\text{H}_{21}\text{F}_3\text{N}_2\text{O}_3 + \text{H}^+$ : 431.1577, found: 431.1576. The product was analyzed by HPLC to determine the enantiomeric excess: 92% ee (Chiralpak AS-H, *i*-propanol/hexane = 10/90, flow rate 1.0 mL/min,  $\lambda$  = 220 nm);  $t_r$  = 7.29 and 8.59 min.

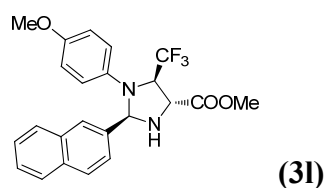

**(2*R*,4*R*,5*R*)-methyl 1-(4-methoxyphenyl)-2-(naphthalen-2-yl)-5-(trifluoromethyl)imidazolidine-4-carboxylate**

### imidazolidine-4-carboxylate

The title compound was prepared according to the general procedure as described above in 76% yield.  $[\alpha]_D^{25} = -68.1$  ( $c$  1.03,  $\text{CHCl}_3$ );  $^1\text{H}$  NMR ( $\text{CDCl}_3$ , TMS, 400 MHz)  $\delta$  8.00 (s, 1H), 7.89-7.83 (m, 3H), 7.68-7.66 (m, 1H), 7.50-7.48 (m, 2H), 6.74 (s, 4H), 5.59 (s, 1H), 4.70 (q,  $J = 6.8$  Hz, 1H), 4.36 (s, 1H), 3.81 (s, 3H), 3.69 (s, 3H), 2.78 (brs, 1H);  $^{13}\text{C}$  NMR ( $\text{CDCl}_3$ , TMS, 100 MHz)  $\delta$  170.5, 153.8, 139.8, 136.4, 133.6, 133.3, 128.9, 128.2, 127.7, 126.4, 126.3, 126.2, 125.9 (q,  $J = 280.9$  Hz), 124.0, 117.1, 114.5, 82.0, 65.5 (q,  $J = 30.5$  Hz), 60.6, 55.4, 53.0; IR (KBr)  $\nu$  3324, 2956, 1743, 1513, 1425, 1250, 1134, 1037, 953, 815, 765, 677, 588  $\text{cm}^{-1}$ . The product was analyzed by HPLC to determine the enantiomeric excess: 95% ee (Chiralpak AS-H, *i*-propanol/hexane = 10/90, flow rate 1.0 mL/min,  $\lambda = 220$  nm);  $t_r = 10.63$  and 16.58 min.

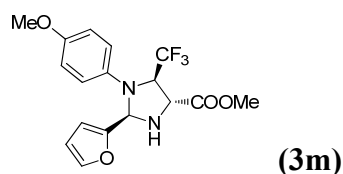

### (2R,4R,5R)-methyl 2-(furan-2-yl)-1-(4-methoxyphenyl)-5-(trifluoromethyl)imidazolidine-4-carboxylate

The title compound was prepared according to the general procedure as described above in 85% yield.  $[\alpha]_D^{25} = +36.3$  ( $c$  1.29,  $\text{CHCl}_3$ );  $^1\text{H}$  NMR ( $\text{CDCl}_3$ , TMS, 300 MHz)  $\delta$  7.42 (s, 1H), 6.80 (s, 4H), 6.42 (d,  $J = 2.7$  Hz, 1H), 6.34 (s, 1H), 5.49 (s, 1H), 4.51 (q,  $J = 6.6$  Hz, 1H), 4.33 (s, 1H), 3.78 (s, 3H), 3.74 (s, 3H);  $^{13}\text{C}$  NMR ( $\text{CDCl}_3$ , TMS, 100 MHz)  $\delta$  170.6, 154.5, 152.1, 142.9, 139.6, 125.5 (q,  $J = 280.5$  Hz), 118.1, 114.6, 110.6, 108.5, 75.9, 65.1 (q,  $J = 30.8$  Hz), 60.5, 55.5, 53.0; IR (KBr)  $\nu$  3318, 2956, 2840, 1745, 1513, 1455, 1250, 1134, 1037, 955, 815, 760, 650  $\text{cm}^{-1}$ . The product was analyzed by HPLC to determine the enantiomeric excess: 96% ee (Chiralpak AS-H, *i*-propanol/hexane = 10/90, flow rate 1.0 mL/min,  $\lambda = 220$  nm);  $t_r = 10.17$  and 21.37 min.

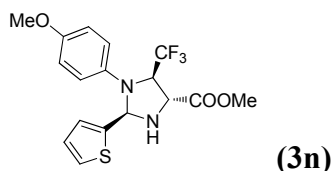

**(2R,4R,5R)-methyl 1-(4-methoxyphenyl)-2-(thiophen-2-yl)-5-(trifluoromethyl)imidazolidine-4-carboxylate**

The title compound was prepared according to the general procedure as described above in 80% yield.  $[\alpha]_D^{25} = -52.7$  (*c* 0.87,  $\text{CHCl}_3$ );  $^1\text{H}$  NMR ( $\text{CDCl}_3$ , TMS, 400 MHz)  $\delta$  7.29-7.27 (m, 1H), 7.22-7.21 (m, 1H), 6.99-6.97 (m, 1H), 6.84 (d,  $J = 9.2$  Hz, 2H), 6.78 (d,  $J = 9.2$  Hz, 2H), 5.69 (s, 1H), 4.52 (q,  $J = 6.8$  Hz, 1H), 4.33 (s, 1H), 3.79 (s, 3H), 3.73 (s, 3H);  $^{13}\text{C}$  NMR ( $\text{CDCl}_3$ , TMS, 100 MHz)  $\delta$  170.5, 154.4, 143.5, 139.6, 127.0, 125.94, 125.90, 125.6 (q,  $J = 280.5$  Hz), 118.1, 114.5, 77.9, 65.8 (q,  $J = 30.7$  Hz), 60.5, 55.4, 52.9; IR (KBr)  $\nu$  3318, 2950, 2844, 1743, 1513, 1460, 1250, 1134, 1038, 935, 822, 721, 529  $\text{cm}^{-1}$ . The product was analyzed by HPLC to determine the enantiomeric excess: 97% ee (Chiralpak AS-H, *i*-propanol/hexane = 10/90, flow rate 1.0 mL/min,  $\lambda = 220$  nm);  $t_r = 9.15$  and 14.01 min.

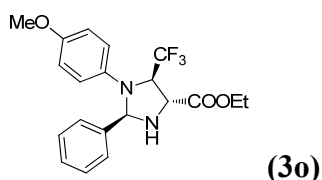

**(2R,4R,5R)-ethyl 1-(4-methoxyphenyl)-2-phenyl-5-(trifluoromethyl)imidazolidine-4-carboxylate**

The title compound was prepared according to the general procedure as described above in 80% yield.  $[\alpha]_D^{25} = -21.6$  (*c* 1.52,  $\text{CHCl}_3$ );  $^1\text{H}$  NMR ( $\text{CDCl}_3$ , TMS, 400 MHz)  $\delta$  7.55 (d,  $J = 6.4$  Hz, 2H), 7.40-7.34 (m, 3H), 6.75 (d,  $J = 9.2$  Hz, 2H), 6.69 (d,  $J = 9.2$  Hz, 2H), 5.44 (s, 1H), 4.60 (q,  $J = 7.2$  Hz, 1H), 4.29 (s, 1H), 4.23 (q,  $J = 7.2$  Hz, 2H), 3.71 (s, 3H), 1.25 (t,  $J = 7.2$  Hz, 3H);  $^{13}\text{C}$  NMR ( $\text{CDCl}_3$ , TMS, 100 MHz)  $\delta$  170.0, 153.8, 140.0, 139.1, 128.94, 128.86, 126.7, 125.9 (q,  $J = 280.8$  Hz), 117.0, 114.5, 81.9, 65.6 (q,  $J = 30.5$  Hz), 62.0, 60.8, 55.5, 14.0; IR (KBr)  $\nu$  3362, 2951, 2855, 1744, 1510, 1436, 1355, 1248, 1135, 1030, 934, 820, 711, 625  $\text{cm}^{-1}$ . HRMS: calcd. for  $\text{C}_{20}\text{H}_{21}\text{F}_3\text{N}_2\text{O}_3 + \text{H}^+$ : 395.1577, found: 395.1569. The product was analyzed by HPLC

to determine the enantiomeric excess: 96% ee (Chiralpak AS-H, *i*-propanol/hexane = 10/90, flow rate 1.0 mL/min,  $\lambda$  = 220 nm);  $t_r$  = 6.90 and 10.26 min.

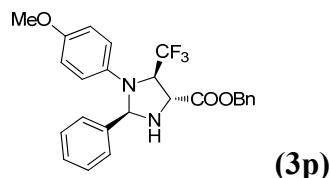

**(2R,4R,5R)-benzyl 1-(4-methoxyphenyl)-2-phenyl-5-(trifluoromethyl)imidazolidine-4-carboxylate**

The title compound was prepared according to the general procedure as described above in 88% yield.  $[\alpha]_D^{25} = -12.7$  (*c* 0.93, CHCl<sub>3</sub>); <sup>1</sup>H NMR (CDCl<sub>3</sub>, TMS, 300 MHz)  $\delta$  7.54-7.52 (m, 2H), 7.37-7.22 (m, 8H), 6.73 (d, *J* = 9.0 Hz, 2H), 6.64 (d, *J* = 9.0 Hz, 2H), 5.44 (s, 1H), 5.19 (s, 2H), 4.58 (q, *J* = 6.9 Hz, 1H), 4.34 (s, 1H), 3.72 (s, 3H), 2.68 (brs, 1H); <sup>13</sup>C NMR (CDCl<sub>3</sub>, TMS, 100 MHz)  $\delta$  169.8, 153.8, 139.9, 139.0, 134.9, 128.93, 128.87, 128.6, 128.4, 128.1, 126.7, 125.8 (q, *J* = 281.0 Hz), 117.0, 114.5, 82.0, 67.5, 65.6 (q, *J* = 30.5 Hz), 60.9, 55.5; IR (KBr)  $\nu$  3318, 2951, 2844, 1755, 1510, 1442, 1360, 1228, 1123, 1035, 933, 825, 690 cm<sup>-1</sup>. HRMS: calcd. for C<sub>25</sub>H<sub>23</sub>F<sub>3</sub>N<sub>2</sub>O<sub>3</sub> + H<sup>+</sup>: 457.1734, found: 457.1738. The product was analyzed by HPLC to determine the enantiomeric excess: 96% ee (Chiralpak AS-H, *i*-propanol/hexane = 10/90, flow rate 1.0 mL/min,  $\lambda$  = 220 nm);  $t_r$  = 9.33 and 16.08 min.

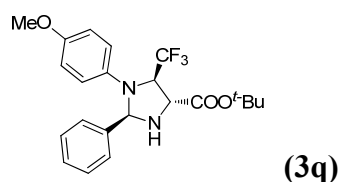

**(2R,4R,5R)-tert-butyl 1-(4-methoxyphenyl)-2-phenyl-5-(trifluoromethyl)imidazolidine-4-carboxylate**

The title compound was prepared according to the general procedure as described above in 84% yield.  $[\alpha]_D^{25} = -22.3$  (*c* 0.61, CHCl<sub>3</sub>); <sup>1</sup>H NMR (CDCl<sub>3</sub>, TMS, 400 MHz)  $\delta$  7.54 (d, *J* = 6.8 Hz, 2H), 7.39-7.33 (m, 3H), 6.75 (d, *J* = 8.8 Hz, 2H), 6.68 (d, *J* = 8.8 Hz, 2H), 5.46 (s, 1H), 4.50 (q, *J* = 6.8 Hz, 1H), 4.18 (s, 1H), 3.71 (s, 3H), 2.63

(brs, 3H), 1.40 (s, 9H);  $^{13}\text{C}$  NMR ( $\text{CDCl}_3$ , TMS, 100 MHz)  $\delta$  169.2, 153.6, 140.3, 139.3, 128.9, 128.8, 126.7, 125.9 (q,  $J = 281.0$  Hz), 116.7, 114.5, 82.7, 82.1, 65.8 (q,  $J = 30.4$  Hz), 61.6, 55.5, 27.8; IR (KBr)  $\nu$  3320, 2955, 2844, 1755, 1510, 1442, 1360, 1228, 1123, 1035, 933, 825, 690  $\text{cm}^{-1}$ . HRMS: calcd. for  $\text{C}_{22}\text{H}_{25}\text{F}_3\text{N}_2\text{O}_3 + \text{H}^+$ : 423.1890, found: 423.1905. The product was analyzed by HPLC to determine the enantiomeric excess: 92% ee (Chiralpak AD-H, *i*-propanol/hexane = 10/90, flow rate 1.0 mL/min,  $\lambda = 220$  nm);  $t_r = 5.56$  and 6.30 min.

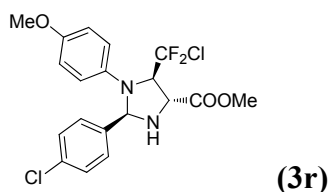

**(2R,4R,5R)-methyl 5-(chlorodifluoromethyl)-2-(4-chlorophenyl)-1-(4-methoxyphenyl)imidazolidine-4-carboxylate**

The title compound was prepared according to the general procedure as described above in 76% yield;  $[\alpha]_D^{25} = -46.4$  ( $c$  0.80,  $\text{CHCl}_3$ );  $^1\text{H}$  NMR ( $\text{CDCl}_3$ , TMS, 400 MHz)  $\delta$  7.50 (d,  $J = 8.4$  Hz, 2H), 7.35 (d,  $J = 8.4$  Hz, 2H), 6.76 (d,  $J = 9.2$  Hz, 2H), 6.72 (d,  $J = 9.2$  Hz, 2H), 5.40 (s, 1H), 4.72 (dd,  $J_1 = 5.2$  Hz,  $J_2 = 13.6$  Hz, 1H), 4.37 (s, 1H), 3.80 (s, 3H), 3.72 (s, 3H);  $^{13}\text{C}$  NMR ( $\text{CDCl}_3$ , TMS, 100 MHz)  $\delta$  170.6, 154.4, 139.6, 137.4, 134.6, 129.9 (t,  $J = 295.7$  Hz), 129.1, 128.3, 118.3, 114.5, 82.3, 71.2 (t,  $J = 24.2$  Hz), 61.6, 55.4, 53.0; IR (KBr)  $\nu$  3340, 2951, 2927, 2844, 1744, 1710, 1595, 1513, 1445, 1360, 1160, 1131, 1040, 929, 815, 752, 669  $\text{cm}^{-1}$ . HRMS: calcd. for  $\text{C}_{19}\text{H}_{18}\text{Cl}_2\text{F}_2\text{N}_2\text{O}_3 + \text{H}^+$ : 431.0735, found: 431.0743. The product was analyzed by HPLC to determine the enantiomeric excess: 97% ee (Chiralpak AS-H, *i*-propanol/hexane = 10/90, flow rate 1.0 mL/min,  $\lambda = 220$  nm);  $t_r = 9.47$  and 12.17 min.

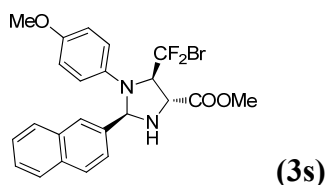

**(2R,4R,5R)-methyl 5-(bromodifluoromethyl)-1-(4-methoxyphenyl)-2-(naphtha-**

### alen-2-yl)imidazolidine-4-carboxylate

The title compound was prepared according to the general procedure as described above in 93% yield.  $[\alpha]_D^{25} = -31.9$  ( $c$  1.81,  $\text{CHCl}_3$ );  $^1\text{H}$  NMR ( $\text{CDCl}_3$ , TMS, 400 MHz)  $\delta$  8.02 (s, 1H), 7.88-7.81 (m, 3H), 7.71 (dd,  $J_1 = 1.2$  Hz,  $J_2 = 8.4$  Hz, 1H), 7.51-7.46 (m, 2H), 6.78 (d,  $J = 9.2$  Hz, 2H), 6.73 (d,  $J = 9.2$  Hz, 2H), 5.58 (s, 1H), 4.84 (dd,  $J_1 = 4.4$  Hz,  $J_2 = 15.6$  Hz, 1H), 4.44 (s, 1H), 3.83 (s, 3H), 3.69 (s, 3H);  $^{13}\text{C}$  NMR ( $\text{CDCl}_3$ , TMS, 100 MHz)  $\delta$  170.6, 154.2, 139.8, 136.3, 133.6, 133.2, 128.8, 128.2, 127.7, 126.39, 126.36, 126.3, 124.5 (t,  $J = 309.8$  Hz), 124.2, 118.2, 114.4, 83.3, 72.7 (t,  $J = 21.3$  Hz), 62.0, 55.4, 53.0; IR (KBr)  $\nu$  3347, 2957, 2927, 2855, 1742, 1513, 1450, 1220, 1178, 1131, 1038, 929, 756, 669, 590  $\text{cm}^{-1}$ . HRMS: calcd. for  $\text{C}_{23}\text{H}_{21}\text{BrF}_2\text{N}_2\text{O}_3 + \text{H}^+$ : 491.0776, found: 491.0769. The product was analyzed by HPLC to determine the enantiomeric excess: 95% ee (Chiralpak AS-H, *i*-propanol/hexane = 10/90, flow rate 1.0 mL/min,  $\lambda = 220$  nm);  $t_r = 13.75$  and 17.03 min.

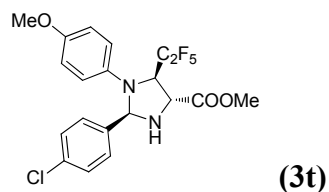

### (2R,4R,5R)-methyl 2-(4-chlorophenyl)-1-(4-methoxyphenyl)-5-(perfluoroethyl)-imidazolidine-4-carboxylate

The title compound was prepared according to the general procedure as described above in 80% yield;  $[\alpha]_D^{25} = -63.2$  ( $c$  1.10,  $\text{CHCl}_3$ );  $^1\text{H}$  NMR ( $\text{CDCl}_3$ , TMS, 400 MHz)  $\delta$  7.49 (d,  $J = 8.4$  Hz, 2H), 7.35 (d,  $J = 8.4$  Hz, 2H), 6.75 (d,  $J = 9.2$  Hz, 2H), 6.66 (d,  $J = 9.2$  Hz, 2H), 5.32 (s, 1H), 4.76 (dd,  $J_1 = 7.6$  Hz,  $J_2 = 19.2$  Hz, 1H), 4.41 (s, 1H), 3.80 (s, 3H), 3.71 (s, 3H), 2.65 (brs, 1H);  $^{13}\text{C}$  NMR ( $\text{CDCl}_3$ , TMS, 100 MHz)  $\delta$  170.5, 154.4, 139.7, 137.7, 134.7, 129.2, 128.2, 118.4, 114.6, 82.0, 63.9 (m), 60.6, 55.4, 53.1; IR (KBr)  $\nu$  3347, 2953, 2940, 1744, 1711, 1595, 1513, 1424, 1361, 1176, 1132, 1040, 929, 815, 752, 669, 626  $\text{cm}^{-1}$ . HRMS: calcd. for  $\text{C}_{20}\text{H}_{18}\text{ClF}_5\text{N}_2\text{O}_3 + \text{H}^+$ : 465.0999, found: 465.1008. The product was analyzed by HPLC to determine the enantiomeric excess: 97% ee (Chiralpak AS-H, *i*-propanol/hexane = 10/90, flow rate 1.0 mL/min, =

220 nm);  $t_r = 6.54$  and 8.30 min.

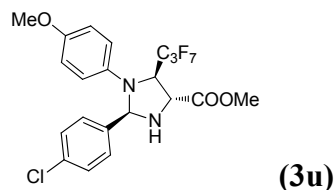

**(2R,4R,5R)-methyl 2-(4-chlorophenyl)-1-(4-methoxyphenyl)-5-(perfluoropropyl)imidazolidine-4-carboxylate**

The title compound was prepared according to the general procedure as described above in 80% yield;  $[\alpha]_D^{25} = -66.6$  ( $c$  1.30,  $\text{CHCl}_3$ );  $^1\text{H}$  NMR ( $\text{CDCl}_3$ , TMS, 400 MHz)  $\delta$  7.49 (d,  $J = 8.4$  Hz, 2H), 7.35 (d,  $J = 8.4$  Hz, 2H), 6.76 (d,  $J = 8.8$  Hz, 2H), 6.66 (d,  $J = 8.8$  Hz, 2H), 5.34 (s, 1H), 4.86 (dd,  $J_1 = 4.4$  Hz,  $J_2 = 21.6$  Hz, 1H), 4.41 (s, 1H), 3.79 (s, 3H), 3.71 (s, 3H), 2.65 (brs, 1H);  $^{13}\text{C}$  NMR ( $\text{CDCl}_3$ , TMS, 100 MHz)  $\delta$  170.5, 154.4, 139.8, 137.7, 134.7, 129.2, 128.2, 118.3, 117.6 (q,  $J = 283.7$  Hz), 114.6, 81.5, 64.1 (m), 60.7, 55.4, 53.1; IR (KBr)  $\nu$  3341, 2940, 1740, 1513, 1476, 1425, 1377, 1262, 1175, 1015, 929, 783, 669  $\text{cm}^{-1}$ . HRMS: calcd. for  $\text{C}_{21}\text{H}_{18}\text{ClF}_7\text{N}_2\text{O}_3 + \text{H}^+$ : 515.0967, found: 515.0968. The product was analyzed by HPLC to determine the enantiomeric excess: 96% ee (Chiralpak AS-H, *i*-propanol/hexane = 10/90, flow rate 1.0 mL/min,  $\lambda = 220$  nm);  $t_r = 5.72$  and 6.75 min.

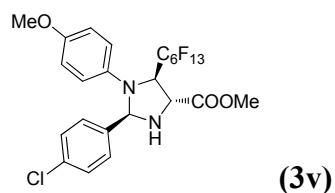

**(2R,4R,5R)-methyl 2-(4-chlorophenyl)-1-(4-methoxyphenyl)-5-(perfluorohexyl)imidazolidine-4-carboxylate**

The title compound was prepared according to the general procedure as described above in 88% yield;  $[\alpha]_D^{25} = -30.9$  ( $c$  1.02,  $\text{CHCl}_3$ );  $^1\text{H}$  NMR ( $\text{CDCl}_3$ , TMS, 400 MHz)  $\delta$  7.49 (d,  $J = 8.4$  Hz, 2H), 7.35 (d,  $J = 8.4$  Hz, 2H), 6.76 (d,  $J = 8.8$  Hz, 2H), 6.66 (d,  $J = 8.8$  Hz, 2H), 5.35 (s, 1H), 4.88 (dd,  $J_1 = 4.0$  Hz,  $J_2 = 22.4$  Hz, 1H), 4.42 (s, 1H), 3.79 (s, 3H), 3.70 (s, 3H), 2.65 (brs, 1H);  $^{13}\text{C}$  NMR ( $\text{CDCl}_3$ , TMS, 100 MHz)  $\delta$  170.5,



154.3, 139.8, 137.7, 134.7, 129.2, 128.2, 118.2, 114.6, 81.5, 64.3 (m), 60.8, 55.4, 53.0; IR (KBr)  $\nu$  3340, 2950, 2834, 1744, 1515, 1446, 1425, 1144, 1016, 929, 771, 669,  $\text{cm}^{-1}$ . HRMS: calcd. for  $\text{C}_{24}\text{H}_{18}\text{ClF}_{13}\text{N}_2\text{O}_3 + \text{H}^+$ : 665.0871, found: 665.0861. The product was analyzed by HPLC to determine the enantiomeric excess: 98% ee (Chiralcel OD-H, *i*-propanol/hexane = 10/90, flow rate 1.0 mL/min,  $\lambda$  = 220 nm);  $t_r$  = 4.21 and 4.77 min.

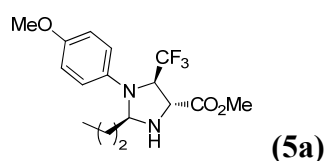

**(2R,4R,5R)-methyl 1-(4-methoxyphenyl)-2-propyl-5-(trifluoromethyl)imidazo-  
lidine-4-carboxylate**

The title compound was prepared according to the general procedure as described above in 80% yield. d.r. = 10:1;  $[\alpha]_D^{25} = -26.1$  ( $c$  0.42,  $\text{CHCl}_3$ );  $^1\text{H}$  NMR ( $\text{CDCl}_3$ , TMS, 400 MHz)  $\delta$  6.94 (d,  $J$  = 8.8 Hz, 2H), 6.86 (d,  $J$  = 8.8 Hz, 2H), 4.47-4.46 (m, 1H), 4.26 (q,  $J$  = 7.2 Hz, 1H), 3.78 (s, 3H), 3.76 (s, 3H), 1.85-1.82 (m, 1H), 1.44-1.40 (m, 3H), 0.94 (t,  $J$  = 6.8 Hz, 3H);  $^{13}\text{C}$  NMR ( $\text{CDCl}_3$ , TMS, 100 MHz)  $\delta$  171.2, 155.1, 140.5, 125.6 (q,  $J$  = 280.0 Hz), 120.9, 114.6, 79.8, 67.2 (q,  $J$  = 30.0 Hz), 60.5, 55.5, 52.9, 36.8, 18.1, 14.1; IR (KBr)  $\nu$  3336, 2957, 2927, 2855, 1742, 1513, 1450, 1220, 1038, 929, 756, 669  $\text{cm}^{-1}$ . HRMS: calcd. for  $\text{C}_{16}\text{H}_{21}\text{F}_3\text{N}_2\text{O}_3 + \text{H}^+$ : 347.1577, found: 347.1584. The product was analyzed by HPLC to determine the enantiomeric excess: 89% ee (Chiralpak AS-H, *i*-propanol/hexane = 10/90, flow rate 1.0 mL/min,  $\lambda$  = 220 nm);  $t_r$  = 5.14 and 6.13 min.

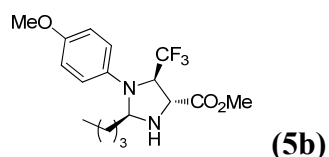

**(2R,4R,5R)-methyl 2-butyl-1-(4-methoxyphenyl)-5-(trifluoromethyl)imidazoli-  
dine-4-carboxylate**

The title compound was prepared according to the general procedure as described

above in 76% yield. d.r. > 20:1;  $[\alpha]_D^{25} = -14.3$  (*c* 0.83, CHCl<sub>3</sub>); <sup>1</sup>H NMR (CDCl<sub>3</sub>, TMS, 400 MHz) δ 6.93 (d, *J* = 9.2 Hz, 2H), 6.85 (d, *J* = 9.2 Hz, 2H), 4.46-4.45 (m, 1H), 4.26 (q, *J* = 7.2 Hz, 1H), 4.21 (s, 1H), 3.78 (s, 3H), 3.76 (s, 3H), 1.90-1.85 (m, 1H), 1.51-1.29 (m, 5H), 0.88 (t, *J* = 7.2 Hz, 3H); <sup>13</sup>C NMR (CDCl<sub>3</sub>, TMS, 100 MHz) δ 171.2, 155.1, 140.4, 125.9 (q, *J* = 279.8 Hz), 120.8, 114.7, 80.0, 67.1 (q, *J* = 29.9 Hz), 60.5, 55.5, 52.9, 34.3, 26.9, 22.7, 14.0; IR (KBr) ν 3368, 1736, 1516, 1448, 1425, 1210, 1044, 929, 705, 656 cm<sup>-1</sup>. HRMS: calcd. for C<sub>17</sub>H<sub>23</sub>F<sub>3</sub>N<sub>2</sub>O<sub>3</sub> + H<sup>+</sup>: 361.1734, found: 361.1742. The product was analyzed by HPLC to determine the enantiomeric excess: 91% ee (Chiralpak AD-H, *i*-propanol/hexane = 5/95, flow rate 1.0 mL/min, λ = 220 nm); t<sub>r</sub> = 6.34 and 7.30 min.

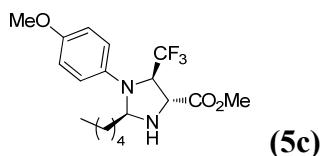

**(2*R*,4*R*,5*R*)-methyl 1-(4-methoxyphenyl)-2-pentyl-5-(trifluoromethyl)imidazolidine-4-carboxylate**

The title compound was prepared according to the general procedure as described above in 85% yield. d.r. = 17:1;  $[\alpha]_D^{25} = -19.0$  (*c* 0.55, CHCl<sub>3</sub>); <sup>1</sup>H NMR (CDCl<sub>3</sub>, TMS, 400 MHz) δ 6.93 (d, *J* = 8.8 Hz, 2H), 6.86 (d, *J* = 8.8 Hz, 2H), 4.46-4.45 (m, 1H), 4.26 (q, *J* = 7.2 Hz, 1H), 4.21 (s, 1H), 3.78 (s, 3H), 3.77 (s, 3H), 1.87-1.85 (m, 1H), 1.51-1.29 (m, 7H), 0.88 (t, *J* = 6.8 Hz, 3H); <sup>13</sup>C NMR (CDCl<sub>3</sub>, TMS, 100 MHz) δ 171.2, 155.1, 140.4, 125.6 (q, *J* = 281.6 Hz), 120.8, 114.7, 80.0, 67.1 (q, *J* = 30.1 Hz), 60.5, 55.5, 52.9, 34.6, 31.8, 24.5, 22.6, 14.0; IR (KBr) ν 3335, 1756, 1512, 1469, 1255, 1032, 917, 740, 669 cm<sup>-1</sup>. HRMS: calcd. for C<sub>18</sub>H<sub>25</sub>F<sub>3</sub>N<sub>2</sub>O<sub>3</sub> + H<sup>+</sup>: 375.1890, found: 375.1883. The product was analyzed by HPLC to determine the enantiomeric excess: 91% ee (Chiralpak AD-H, *i*-propanol/hexane = 10/90, flow rate 1.0 mL/min, λ = 220 nm); t<sub>r</sub> = 5.34 and 5.88 min.

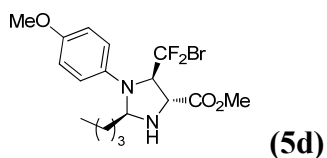

**(2R,4R,5R)-methyl 5-(bromodifluoromethyl)-1-(4-methoxyphenyl)-2-propylimidazolidine-4-carboxylate**

The title compound was prepared according to the general procedure as described above in 80% yield. d.r. = 15:1;  $[\alpha]_D^{25} = -12.6$  (*c* 0.27, CHCl<sub>3</sub>); <sup>1</sup>H NMR (CDCl<sub>3</sub>, TMS, 400 MHz)  $\delta$  7.03 (d, *J* = 8.8 Hz, 2H), 6.86 (d, *J* = 8.8 Hz, 2H), 4.38-4.33 (m, 2H), 4.26 (s, 1H), 3.80 (s, 3H), 3.78 (s, 3H), 1.86-1.80 (m, 1H), 1.48-1.45 (m, 2H), 1.32-1.30 (m, 3H), 0.88 (t, *J* = 7.2 Hz, 3H); <sup>13</sup>C NMR (CDCl<sub>3</sub>, TMS, 100 MHz)  $\delta$  171.3, 156.0, 140.3, 125.3 (t, *J* = 309.0 Hz), 123.5, 114.6, 81.8, 74.5 (t, *J* = 20.3 Hz), 62.1, 55.5, 52.9, 34.1, 26.9, 22.8, 14.0; IR (KBr)  $\nu$  3317, 2957, 1740, 1515, 1477, 1425, 1250, 1023, 930, 755, 670 cm<sup>-1</sup>. HRMS: calcd. for C<sub>17</sub>H<sub>23</sub>BrF<sub>2</sub>N<sub>2</sub>O<sub>3</sub> + H<sup>+</sup>: 421.0933, found: 421.0935. The product was analyzed by HPLC to determine the enantiomeric excess: 92% ee (Chiralpak AD-H, *i*-propanol/hexane = 5/95, flow rate 1.0 mL/min,  $\lambda$  = 220 nm); *t*<sub>r</sub> = 6.23 and 6.90 min.

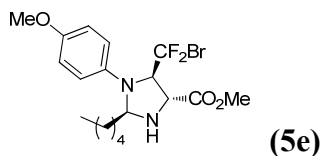

**(2R,4R,5R)-methyl 5-(bromodifluoromethyl)-2-ethyl-1-(4-methoxyphenyl)imidazolidine-4-carboxylate**

The title compound was prepared according to the general procedure as described above in 76% yield. d.r. = 10:1;  $[\alpha]_D^{25} = -20.7$  (*c* 0.15, CHCl<sub>3</sub>); <sup>1</sup>H NMR (CDCl<sub>3</sub>, TMS, 400 MHz)  $\delta$  7.03 (d, *J* = 8.8 Hz, 2H), 6.86 (d, *J* = 8.8 Hz, 2H), 4.37-4.33 (m, 1H), 4.26 (s, 1H), 3.80 (s, 3H), 3.78 (s, 3H), 1.86-1.79 (m, 1H), 1.47-1.26 (m, 7H), 0.87 (t, *J* = 6.8 Hz, 3H); <sup>13</sup>C NMR (CDCl<sub>3</sub>, TMS, 100 MHz)  $\delta$  171.4, 156.0, 140.3, 123.5, 114.6, 81.9, 74.5 (t, *J* = 20.6 Hz), 62.1, 55.5, 52.9, 34.4, 31.9, 24.5, 22.5, 14.0; IR (KBr)  $\nu$  2958, 2924, 1743, 1512, 1477, 1435, 1215, 1133, 1021, 935, 783, 670 cm<sup>-1</sup>. HRMS: calcd. for C<sub>18</sub>H<sub>25</sub>BrF<sub>2</sub>N<sub>2</sub>O<sub>3</sub> + H<sup>+</sup>: 435.1089, found: 435.1076. The

product was analyzed by HPLC to determine the enantiomeric excess: 91% ee (Chiralpak AD-H, *i*-propanol/hexane = 5/95, flow rate 1.0 mL/min,  $\lambda$  = 220 nm);  $t_r$  = 6.08 and 6.84 min.

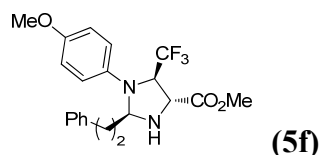

**(2R,4R,5R)-methyl 1-(4-methoxyphenyl)-2-phenethyl-5-(trifluoromethyl)imidazolidine-4-carboxylate**

The title compound was prepared according to the general procedure as described above in 80% yield. d.r. > 20:1;  $[\alpha]_D^{25}$  = -34.5 (*c* 0.95, CHCl<sub>3</sub>); <sup>1</sup>H NMR (CDCl<sub>3</sub>, TMS, 400 MHz)  $\delta$  7.29-7.25 (m, 2H), 7.20-7.17 (m, 3H), 6.91 (d, *J* = 9.2 Hz, 2H), 6.83 (d, *J* = 9.2 Hz, 2H), 4.51-4.49 (m, 1H), 4.26 (q, *J* = 7.2 Hz, 1H), 4.23 (s, 1H), 3.78 (s, 3H), 3.77 (s, 3H), 2.84-2.71 (m, 1H), 2.72-2.69 (m, 1H), 2.18-2.15 (m, 1H), 1.80-1.74 (m, 1H); <sup>13</sup>C NMR (CDCl<sub>3</sub>, TMS, 100 MHz)  $\delta$  171.2, 155.4, 141.3, 140.3, 128.4, 128.3, 126.0, 125.6 (q, *J* = 279.9 Hz), 121.4, 114.7, 79.6, 67.3 (q, *J* = 30.1 Hz), 60.6, 55.5, 52.9, 36.1, 31.0; IR (KBr)  $\nu$  2956, 2840, 1743, 1603, 1512, 1480, 1439, 1214, 1133, 1036, 929, 783, 771, 669 cm<sup>-1</sup>. HRMS: calcd. for C<sub>21</sub>H<sub>23</sub>F<sub>3</sub>N<sub>2</sub>O<sub>3</sub> + Na<sup>+</sup>: 431.1553, found: 431.1568. The product was analyzed by HPLC to determine the enantiomeric excess: 92% ee (Chiralpak AD-H, *i*-propanol/hexane = 10/90, flow rate 1.0 mL/min,  $\lambda$  = 220 nm);  $t_r$  = 7.77 and 8.76 min.

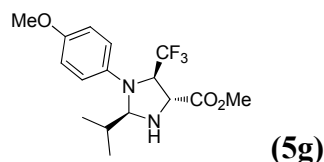

**(2R,4R,5R)-methyl 2-isopropyl-1-(4-methoxyphenyl)-5-(trifluoromethyl)imidazolidine-4-carboxylate**

The title compound was prepared according to the general procedure as described above in 76% yield. d.r. > 20:1;  $[\alpha]_D^{25}$  = -17.5 (*c* 0.61, CHCl<sub>3</sub>); <sup>1</sup>H NMR (CDCl<sub>3</sub>, TMS, 400 MHz)  $\delta$  7.06 (d, *J* = 9.2 Hz, 2H), 6.85 (d, *J* = 9.2 Hz, 2H), 4.35 (d, *J* = 3.6

Hz, 1H), 4.18-4.13 (m, 2H), 3.80 (s, 3H), 3.78 (s, 3H), 1.94-1.89 (m, 1H), 0.99 (d,  $J = 6.8$  Hz, 3H), 0.94 (d,  $J = 6.8$  Hz, 3H);  $^{13}\text{C}$  NMR ( $\text{CDCl}_3$ , TMS, 100 MHz)  $\delta$  171.6, 156.1, 141.1, 125.7 (q,  $J = 280.1$  Hz), 123.9, 114.6, 85.1, 68.6 (q,  $J = 29.7$  Hz), 60.5, 55.5, 52.9, 29.7, 19.2, 14.6; IR (KBr)  $\nu$  3317, 2957, 2436, 1742, 1603, 1479, 1425, 1214, 1133, 1036, 929, 669  $\text{cm}^{-1}$ . HRMS: calcd. for  $\text{C}_{16}\text{H}_{21}\text{F}_3\text{N}_2\text{O}_3 + \text{H}^+$ : 347.1577, found: 347.1585. The product was analyzed by HPLC to determine the enantiomeric excess: 91% ee (Chiralpak AS-H, *i*-propanol/hexane = 10/90, flow rate 1.0 mL/min,  $\lambda = 220$  nm);  $t_r = 4.79$  and 5.33 min.

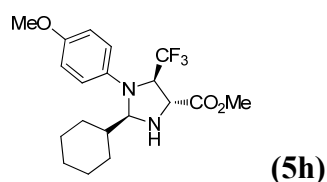

**(2R,4R,5R)-methyl 2-cyclohexyl-1-(4-methoxyphenyl)-5-(trifluoromethyl)imidazolidine-4-carboxylate**

The title compound was prepared according to the general procedure as described above in 76% yield. d.r. > 20:1;  $[\alpha]_D^{25} = -32.3$  ( $c$  0.56,  $\text{CHCl}_3$ );  $^1\text{H}$  NMR ( $\text{CDCl}_3$ , TMS, 400 MHz)  $\delta$  7.03 (d,  $J = 8.8$  Hz, 2H), 6.85 (d,  $J = 8.8$  Hz, 2H), 4.35 (d,  $J = 4.0$  Hz, 1H), 4.17-4.13 (m, 2H), 3.79 (s, 3H), 3.78 (s, 3H), 2.60 (brs, 1H), 1.92-1.89 (m, 1H), 1.79-1.65 (m, 5H), 1.19-1.12 (m, 4H), 0.95-0.92 (m, 1H);  $^{13}\text{C}$  NMR ( $\text{CDCl}_3$ , TMS, 100 MHz)  $\delta$  171.5, 155.8, 141.3, 125.6 (q,  $J = 279.8$  Hz), 123.2, 114.5, 84.5, 68.3 (q,  $J = 29.8$  Hz), 60.5, 55.4, 52.8, 40.2, 30.0, 26.6, 26.5, 26.1, 25.7; IR (KBr)  $\nu$  3317, 2957, 2434, 1740, 1601, 1469, 1423, 1210, 1131, 1034, 929, 669  $\text{cm}^{-1}$ . HRMS: calcd. for  $\text{C}_{19}\text{H}_{25}\text{F}_3\text{N}_2\text{O}_3 + \text{H}^+$ : 387.1890, found: 387.1894. The product was analyzed by HPLC to determine the enantiomeric excess: 90% ee (Chiralpak AD-H, *i*-propanol/hexane = 10/90, flow rate 1.0 mL/min,  $\lambda = 220$  nm);  $t_r = 5.43$  and 6.32 min.

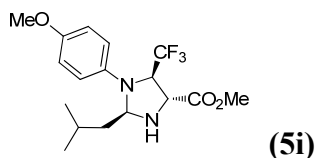

**(2R,4R,5R)-methyl 2-isobutyl-1-(4-methoxyphenyl)-5-(trifluoromethyl)imidazolidine-4-carboxylate**

The title compound was prepared according to the general procedure as described above in 85% yield. d.r. = 15:1;  $[\alpha]_D^{25} = -37.3$  (*c* 1.12, CHCl<sub>3</sub>); <sup>1</sup>H NMR (CDCl<sub>3</sub>, TMS, 400 MHz) δ 6.92 (d, *J* = 9.2 Hz, 2H), 6.85 (d, *J* = 9.2 Hz, 2H), 4.56-4.54 (m, 1H), 4.24 (q, *J* = 7.2 Hz, 1H), 4.21 (s, 1H), 3.77 (s, 3H), 3.76 (s, 3H), 1.84-1.71 (m, 2H), 1.35-1.33 (m, 1H), 0.98 (d, *J* = 6.4 Hz, 3H), 0.93 (d, *J* = 6.8 Hz, 3H); <sup>13</sup>C NMR (CDCl<sub>3</sub>, TMS, 100 MHz) δ 171.1, 154.9, 140.5, 125.6 (q, *J* = 279.9 Hz), 120.4, 114.6, 78.5, 67.0 (q, *J* = 30.0 Hz), 60.6, 55.5, 52.8, 44.3, 25.3, 23.7, 22.0; IR (KBr) ν 2955, 2434, 1741, 1608, 1468, 1421, 1210, 1135, 1037, 929, 668 cm<sup>-1</sup>. HRMS: calcd. for C<sub>17</sub>H<sub>23</sub>F<sub>3</sub>N<sub>2</sub>O<sub>3</sub> + H<sup>+</sup>: 361.1734, found: 361.1737. The product was analyzed by HPLC to determine the enantiomeric excess: 90% ee (Chiralpak AS-H, *i*-propanol/hexane = 10/90, flow rate 1.0 mL/min, λ = 220 nm); t<sub>r</sub> = 4.81 and 5.16 min.

**V. Synthetic Transformations.**

Due to high volatility of (2R,3R)-2,3-diamino-4,4,4-trifluoro-butanoate, oxidative cleavage of the PMP group could be performed as below: Firstly, diamine **6** was obtained by acidic hydrolysis of the corresponding cycloadduct **3a** in good yield. The diamine **6** was further transformed into cyclic urea **7** with triphosphen, then treatment with Ce(NH<sub>4</sub>)<sub>2</sub>(NO<sub>3</sub>)<sub>6</sub> gave the derived amide **8** without loss of the diastereo-/enantiomeric excess.

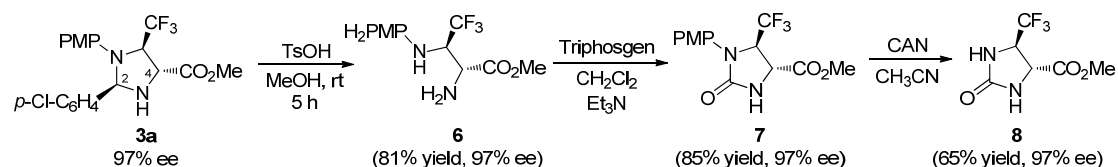

**3a** (207 mg, 0.5 mmol) was dissolved in 3 mL of methanol at room temperature followed by the addition of TsOH·H<sub>2</sub>O (380 mg, 2 mmol). The reaction mixture was

stirred until starting material was consumed (monitored by TLC) and neutralized the mixture by Na<sub>2</sub>CO<sub>3</sub>. Then the mixture was partitioned between ethyl acetate and water, then the organic layer was washed with brine, dried over MgSO<sub>4</sub>, and concentrated in vacuo then the organic solvent was removed and the residue was purified by column chromatography to give compound **6** in 81% yield.

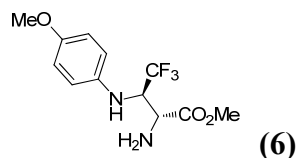

**(2R,3R)-methyl 2-amino-4,4,4-trifluoro-3-((4-methoxyphenyl)amino)butanoate**

$[\alpha]_D^{25} = -41.2$  (*c* 0.73, CHCl<sub>3</sub>); <sup>1</sup>H NMR (CDCl<sub>3</sub>, TMS, 300 MHz)  $\delta$  6.76 (d, *J* = 8.7 Hz, 2H), 6.66 (d, *J* = 8.7 Hz, 2H), 4.54-4.51 (m, 1H), 4.43-4.36 (m, 1H), 4.12 (s, 1H), 3.73 (s, 3H), 3.59 (s, 3H), 1.78 (brs, 2H); <sup>13</sup>C NMR (CDCl<sub>3</sub>, TMS, 100 MHz)  $\delta$  171.7, 153.1, 139.9, 125.6 (q, *J* = 283.1 Hz), 116.0, 114.7, 58.4 (q, *J* = 27.9 Hz), 55.6, 52.7, 52.6; IR (KBr)  $\nu$  3368, 2951, 1746, 1516, 1453, 1218, 1035, 929, 669 cm<sup>-1</sup>. The product was analyzed by HPLC to determine the enantiomeric excess: 97% ee (Chiralpak AS-H, *i*-propanol/hexane = 10/90, flow rate 1.0 mL/min,  $\lambda$  = 220 nm); *t*<sub>r</sub> = 11.07 and 20.46 min.

To a solution of **6** (100 mg, 0.34 mmol) and triethylamine (141  $\mu$ L, 1.02 mmol) in dry CH<sub>2</sub>Cl<sub>2</sub> (15.0 mL) under nitrogen at 0 °C was added a solution of triphosgene (100 mg, 0.34 mmol) in dry CH<sub>2</sub>Cl<sub>2</sub> dropwise. The reaction mixture was warmed to room temperature and stirred until the starting material was consumed completely as indicated by TLC. Then the reaction was quenched and purified by column chromatography to give the cyclic urea **7**.

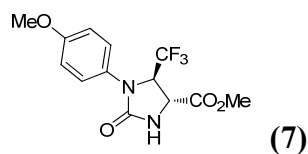

**(4R,5R)-methyl 1-(4-methoxyphenyl)-2-oxo-5-(trifluoromethyl)imidazolidine-4-carboxylate**

$[\alpha]_D^{25} = +18.8$  (*c* 0.16, CHCl<sub>3</sub>); <sup>1</sup>H NMR (CDCl<sub>3</sub>, TMS, 300 MHz)  $\delta$  7.24 (d, *J* = 9.0 Hz, 2H), 6.92 (d, *J* = 9.0 Hz, 2H), 5.85 (s, 1H), 4.91-4.88 (m, 1H), 4.33 (d, *J* = 2.4 Hz,

1H), 3.89 (s, 3H), 3.81 (s, 3H);  $^{13}\text{C}$  NMR ( $\text{CDCl}_3$ , TMS, 75 MHz)  $\delta$  169.7, 158.9, 158.2, 129.3, 126.9, 123.8 (q,  $J = 281.5$  Hz), 114.3, 61.1 (q,  $J = 32.4$  Hz), 55.3, 53.3, 51.9; IR (KBr)  $\nu$  2917, 2846, 2335, 1722, 1515, 1423, 1241, 1166  $\text{cm}^{-1}$ . HRMS: calcd. for  $\text{C}_{13}\text{H}_{13}\text{F}_3\text{N}_2\text{O}_4 + \text{H}^+$ : 319.0897, found: 319.0900. The product was analyzed by HPLC to determine the enantiomeric excess: 97% ee (Chiralpak AD-H, *i*-propanol/hexane = 40/60, flow rate 1.0 mL/min,  $\lambda = 220$  nm);  $t_r = 14.87$  and 16.88 min.

To a solution of **7** (92 mg, 0.29 mmol) in dry acetonitrile (2.0 mL) was added dropwise a solution of CAN (477 mg, 0.87 mmol) in  $\text{H}_2\text{O}$  (1.0 mL) at 0 °C. The reaction was completed immediately and quenched by the addition of saturated  $\text{NH}_4\text{Cl}$  aqueous solution. The phases were separated and the aqueous phase was extracted with ethyl acetate. The combined organic phases were dried over sodium sulfate and concentrated under vacuum. The residue was purified by chromatography to give **8** as a white solid.

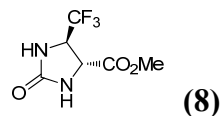

**(4*R*,5*R*)-methyl 2-oxo-5-(trifluoromethyl)imidazolidine-4-carboxylate**

$[\alpha]_D^{25} = -35.0$  ( $c$  0.20,  $\text{CHCl}_3$ );  $^1\text{H}$  NMR ( $\text{CDCl}_3$ , TMS, 300 MHz)  $\delta$  6.92 (s, 1H), 6.41 (s, 1H), 4.46 (m, 1H), 4.33 (d,  $J = 3.2$  Hz, 1H), 3.85 (s, 3H);  $^{13}\text{C}$  NMR ( $\text{DMSO}-d_6$ , TMS, 100 MHz)  $\delta$  170.7, 161.1, 124.7 (q,  $J = 279.4$  Hz), 55.2 (q,  $J = 32.2$  Hz), 53.4, 52.9; IR (KBr)  $\nu$  3243, 2922, 2360, 2341, 1724, 1443, 1240, 1176, 1145  $\text{cm}^{-1}$ . HRMS: calcd. for  $\text{C}_6\text{H}_7\text{F}_3\text{N}_2\text{O}_3 + \text{Na}^+$ : 235.0296, found: 235.0301. The product was analyzed by GC to determine the enantiomeric excess: 97% ee ( $\beta$ -dex 325 column, 30 m x 0.25 mm x 0.25  $\mu\text{m}$ , column temperature: 170 °C, carrier gas:  $\text{N}_2$ , 1 mL/min);  $t_r = 9.84$  and 14.29 min.

**VI. Linear Effect for the 1,3-Dipolar Cycloaddition of Trifluoromethylated Imine **1a** with Imino Ester **2a** Catalyzed by  $\text{Cu}(\text{CH}_3\text{CN})_4\text{BF}_4/(\text{S},\text{R}_p)\text{-PPFOMe}$  Complex.**



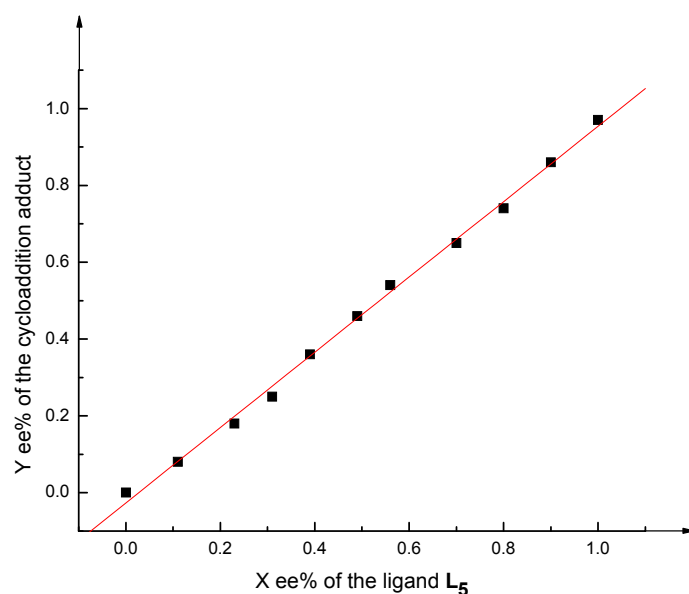

Ee of (*S,R<sub>p</sub>*)-**L5** were determined by HPLC: Chiralpak AD-H, *i*-propanol/hexane = 1/99, flow rate 0.5 mL/min,  $\lambda$  = 254 nm;  $t_r$  = 16.01 and 21.18 min.

| <b>L5<sub>ee</sub></b> (%)   | 11 | 23 | 31 | 39 | 49 | 56 | 70 | 80 | 90 | 100 |
|------------------------------|----|----|----|----|----|----|----|----|----|-----|
| <b>Prod<sub>ee</sub></b> (%) | 8  | 18 | 25 | 36 | 46 | 54 | 65 | 74 | 86 | 97  |

## VII. Proposed Transition States of the *exo'*-Selectivity for Asymmetric 1,3-Dipolar Cycloaddition of Imino Esters with Fluorinated Imines.

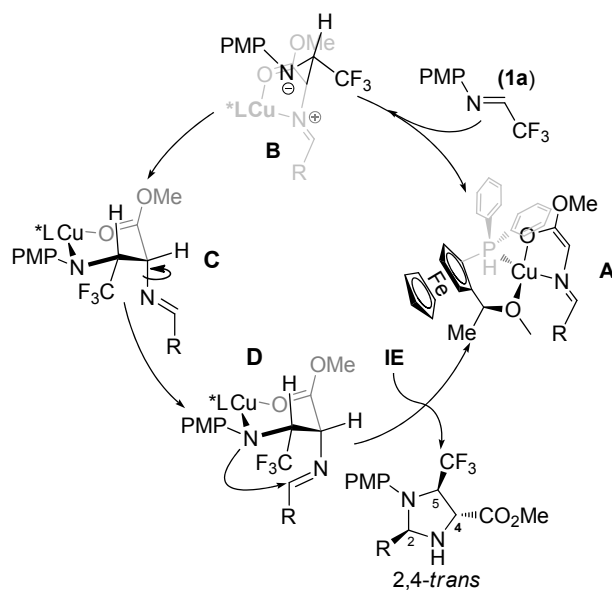

**Scheme S1.** Postulated catalytic cycle for Cu(I)-catalyzed asymmetric 1,3-DC of azomethine ylide with fluorinated imines.

Based on the relative and absolute configuration of (2*R*,4*R*,5*R*)-**3s** and previous studies,<sup>3</sup> a plausible stepwise mechanism was proposed to rationalize the observed *exo'*-selectivity for this 1,3-DC. The *in situ*-formed azomethine ylide is coordinated to the Cu complex leading to the catalytically active species (**A**) based on the linear correlation results. Initial Mannich addition of the metalloazomethine ylide (**A**) to the *Re* face (C=N) of the fluorinated imine **1a** through the gauche conformation generates the zwitterionic intermediate (**B**), which could be facilitated by the possible coordination interaction between the imino group of **1a** and the Cu(I) center. After the Mannich reaction, the copper atom spontaneously switches from imino ester to NPMP for forming the six-membered chair-like species (**C**).<sup>3</sup> Before the subsequent intramolecular cyclization, the C-N single bond must rotate into the species (**D**) hence the amino unit approaches the *Re* face of the imine moiety to give the *exo'*-diastereomer, in which the substituents at 2 and 4 position of imidazolidine ring are arranged at *trans* configuration. Nevertheless, the real catalytic mechanism still needs further investigation.

## VIII. References.

1. T. Hayashi, T. Mise, M. Fukushima, M. Kagotani, N. Nagashima, Y. Hamada, A. Matsumoto, S. Kawakami, M. Konishi, K. Yamamoto, M. Kumada, *Bull. Chem. Soc. Jpn.* **1980**, 53, 1138.
2. (a) J.-H. Lin, J.-C. Xiao, *Eur. J. Org. Chem.* **2011**, 4536; (b) A. Abouabdellah, J.-P. Bégué, D. Bonnet-Delpon, T. T. T. Nga, *J. Org. Chem.* **1997**, 62, 8826; c) J. Takagi, R. Takihana, A. Kuwano, K. Uneyama, *Synthesis* **2007**, 11, 1624.
3. (a) T. Arai, N. Yokoyama, A. Mishiro and H. Sato, *Angew. Chem., Int. Ed.*, **2010**, 49, 7895; (b) A. Awata and T. Arai, *Chem. Eur. J.* **2012**, 18, 8278.

# IX. <sup>1</sup>H NMR and <sup>13</sup>C NMR Spectra.

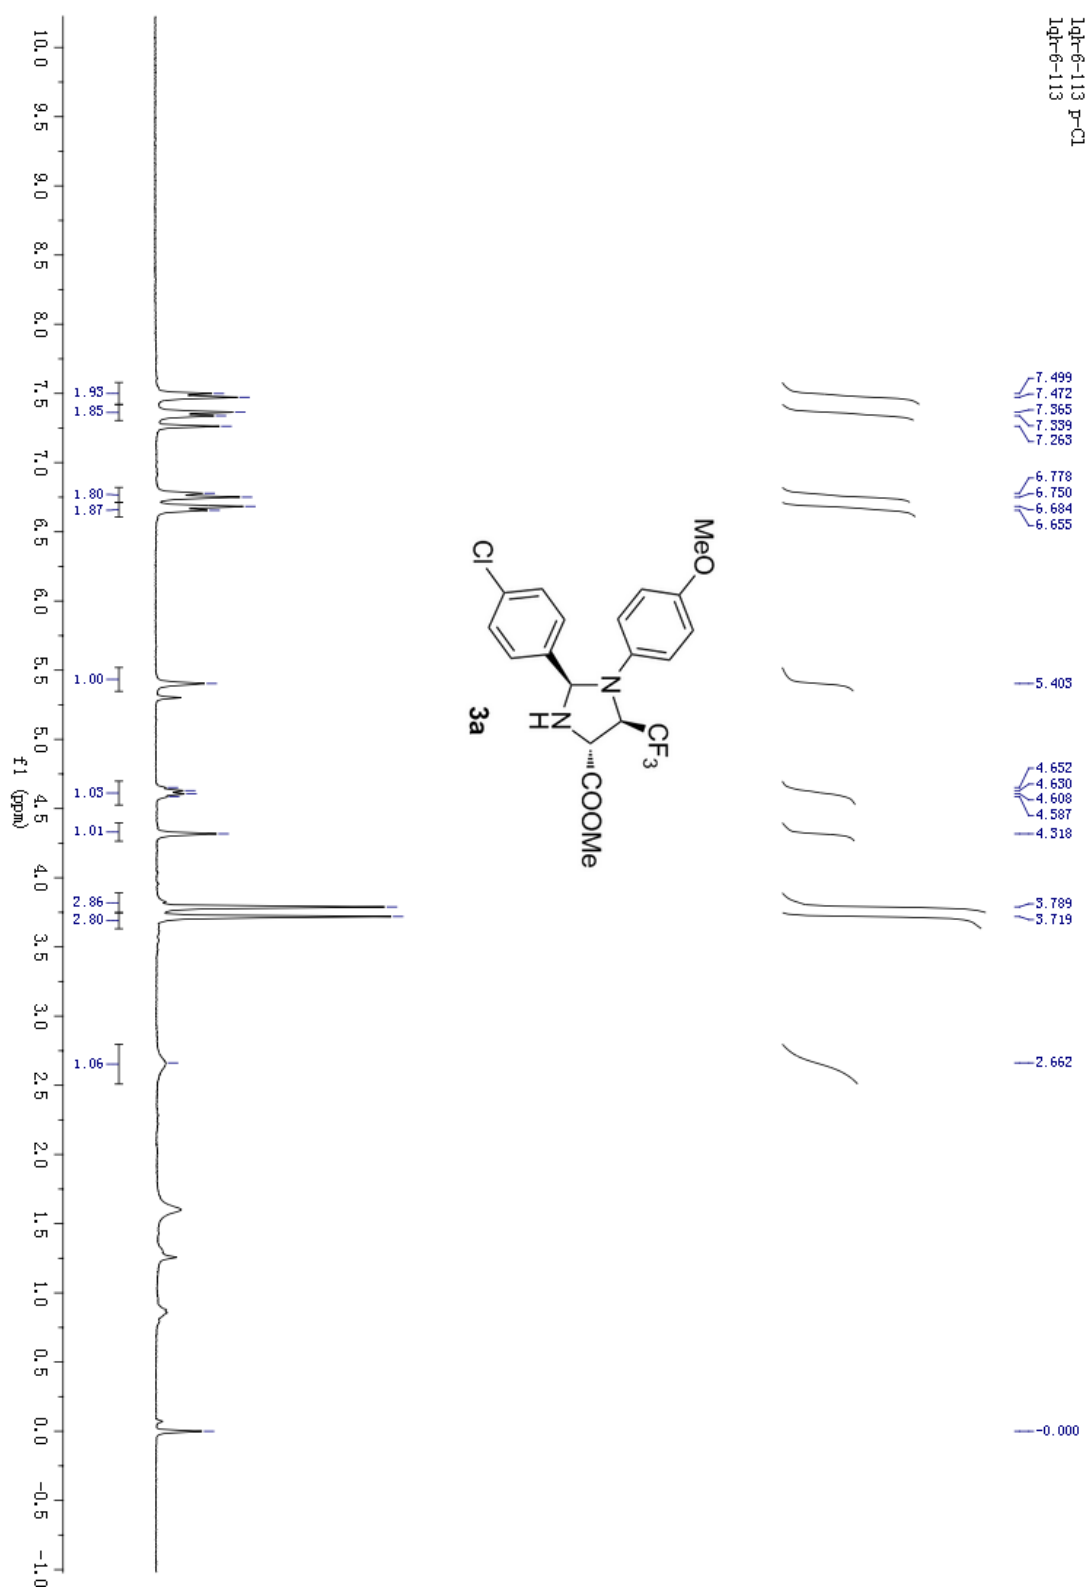

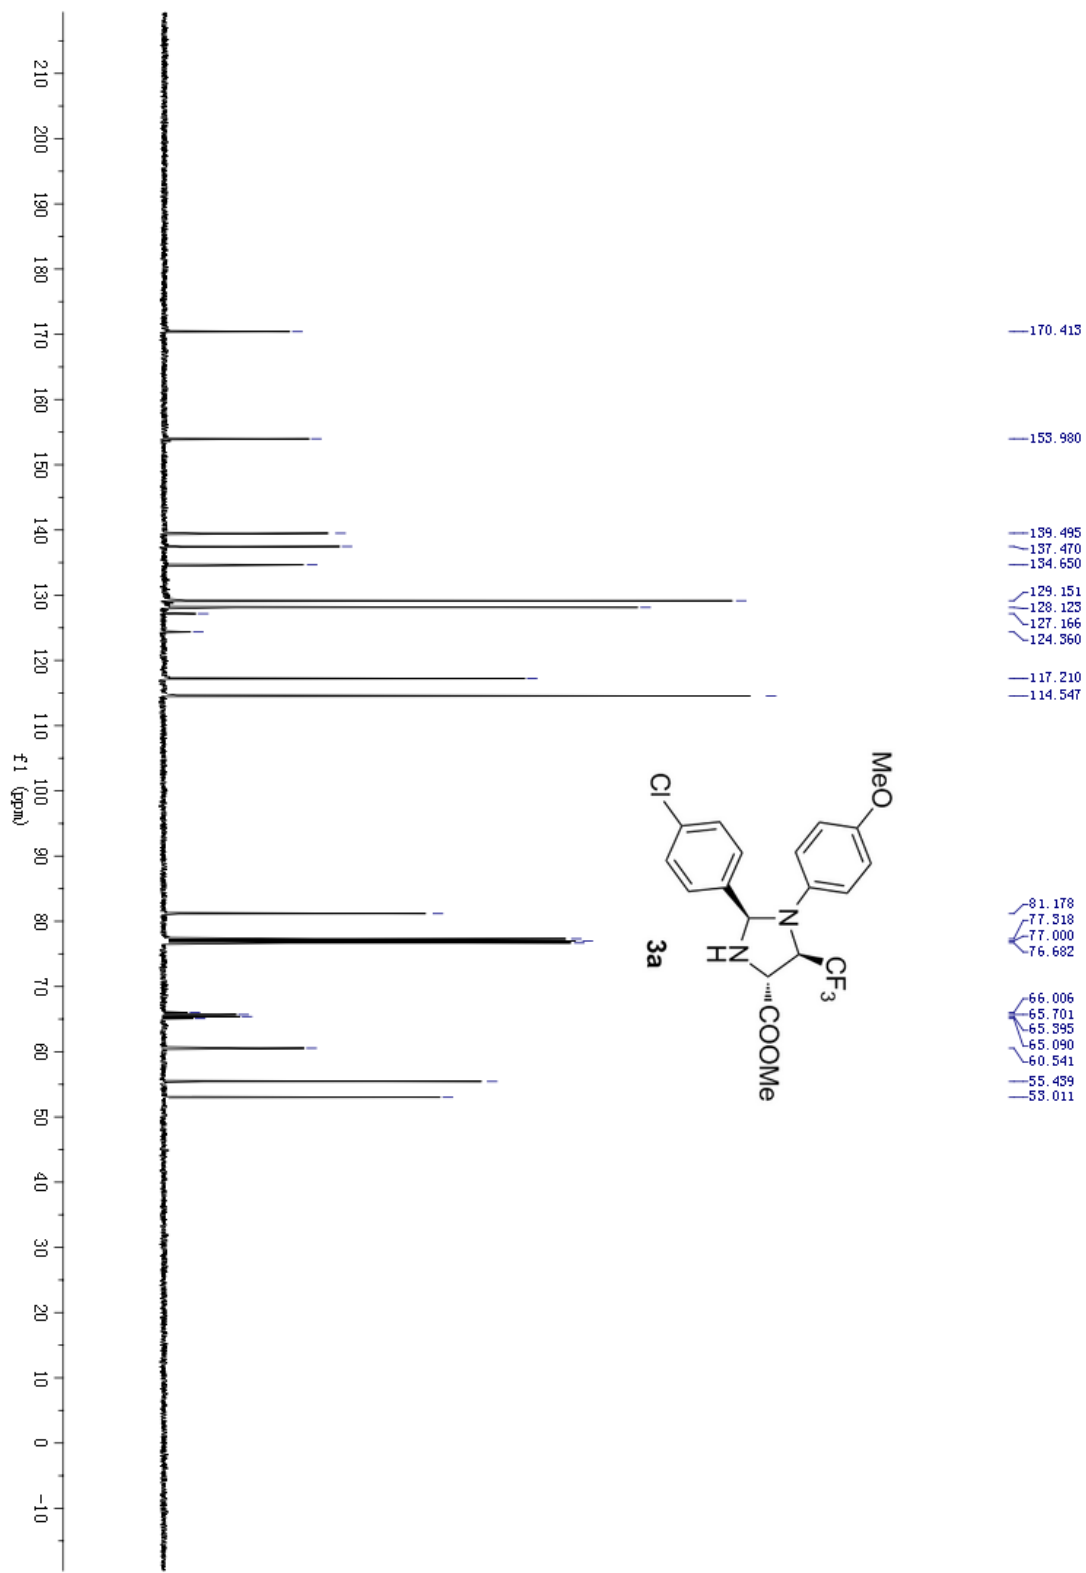

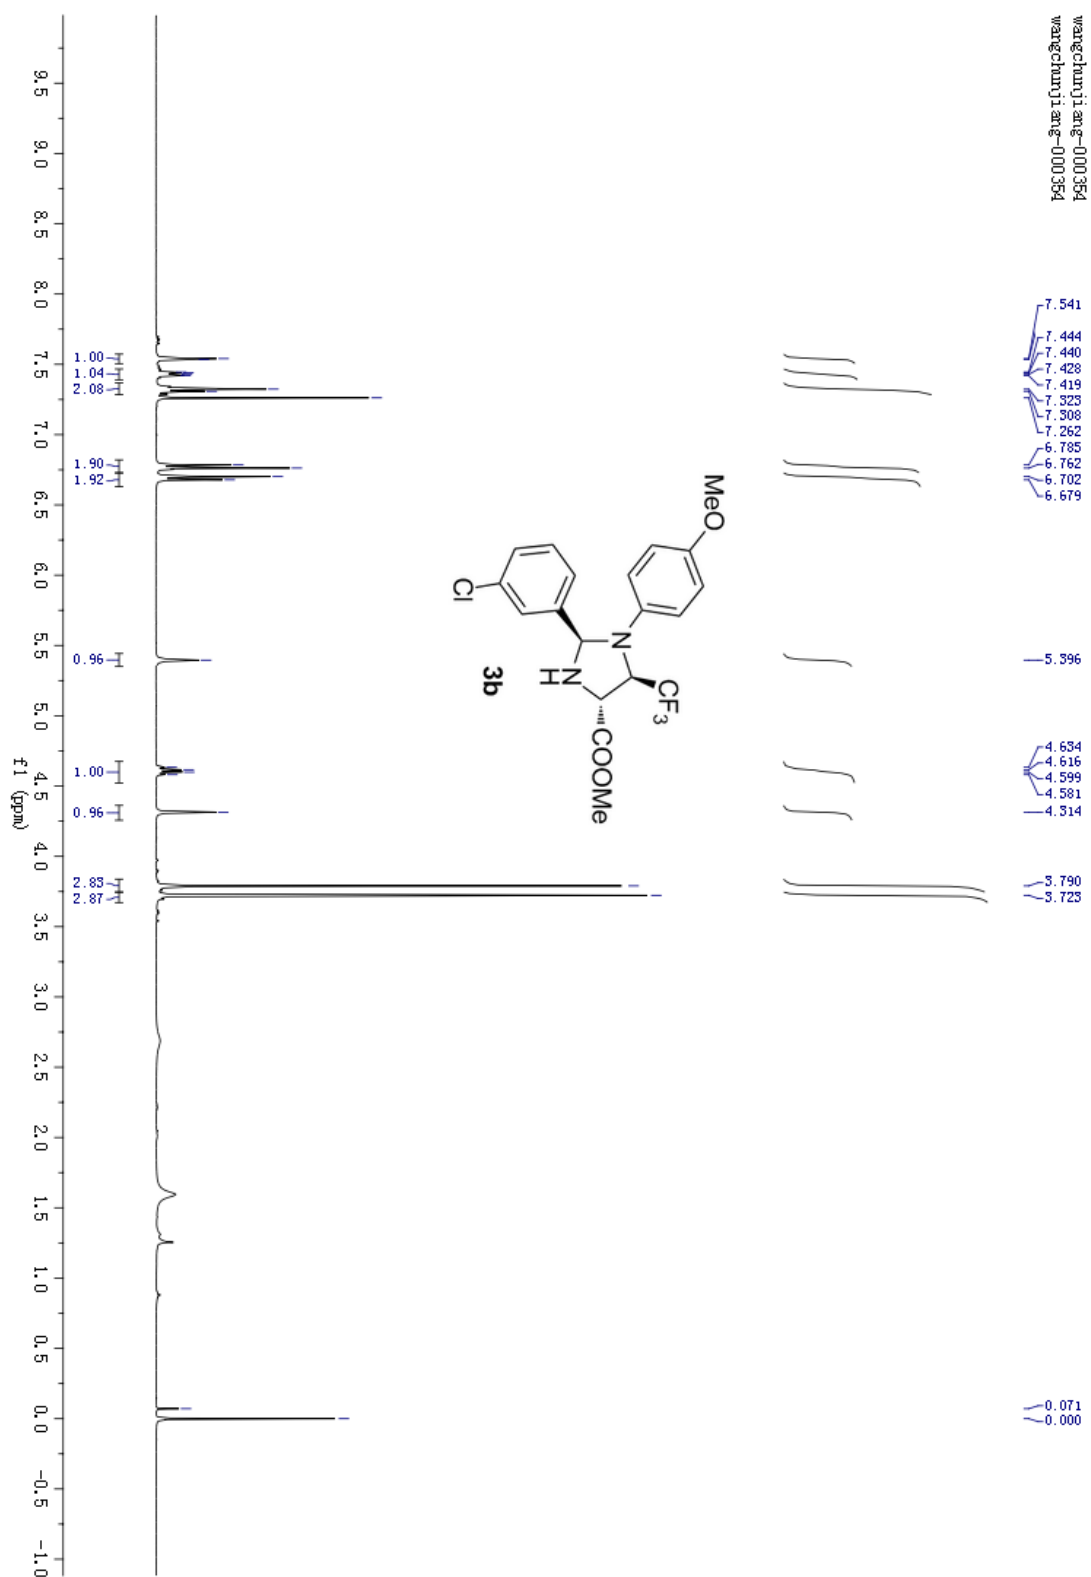

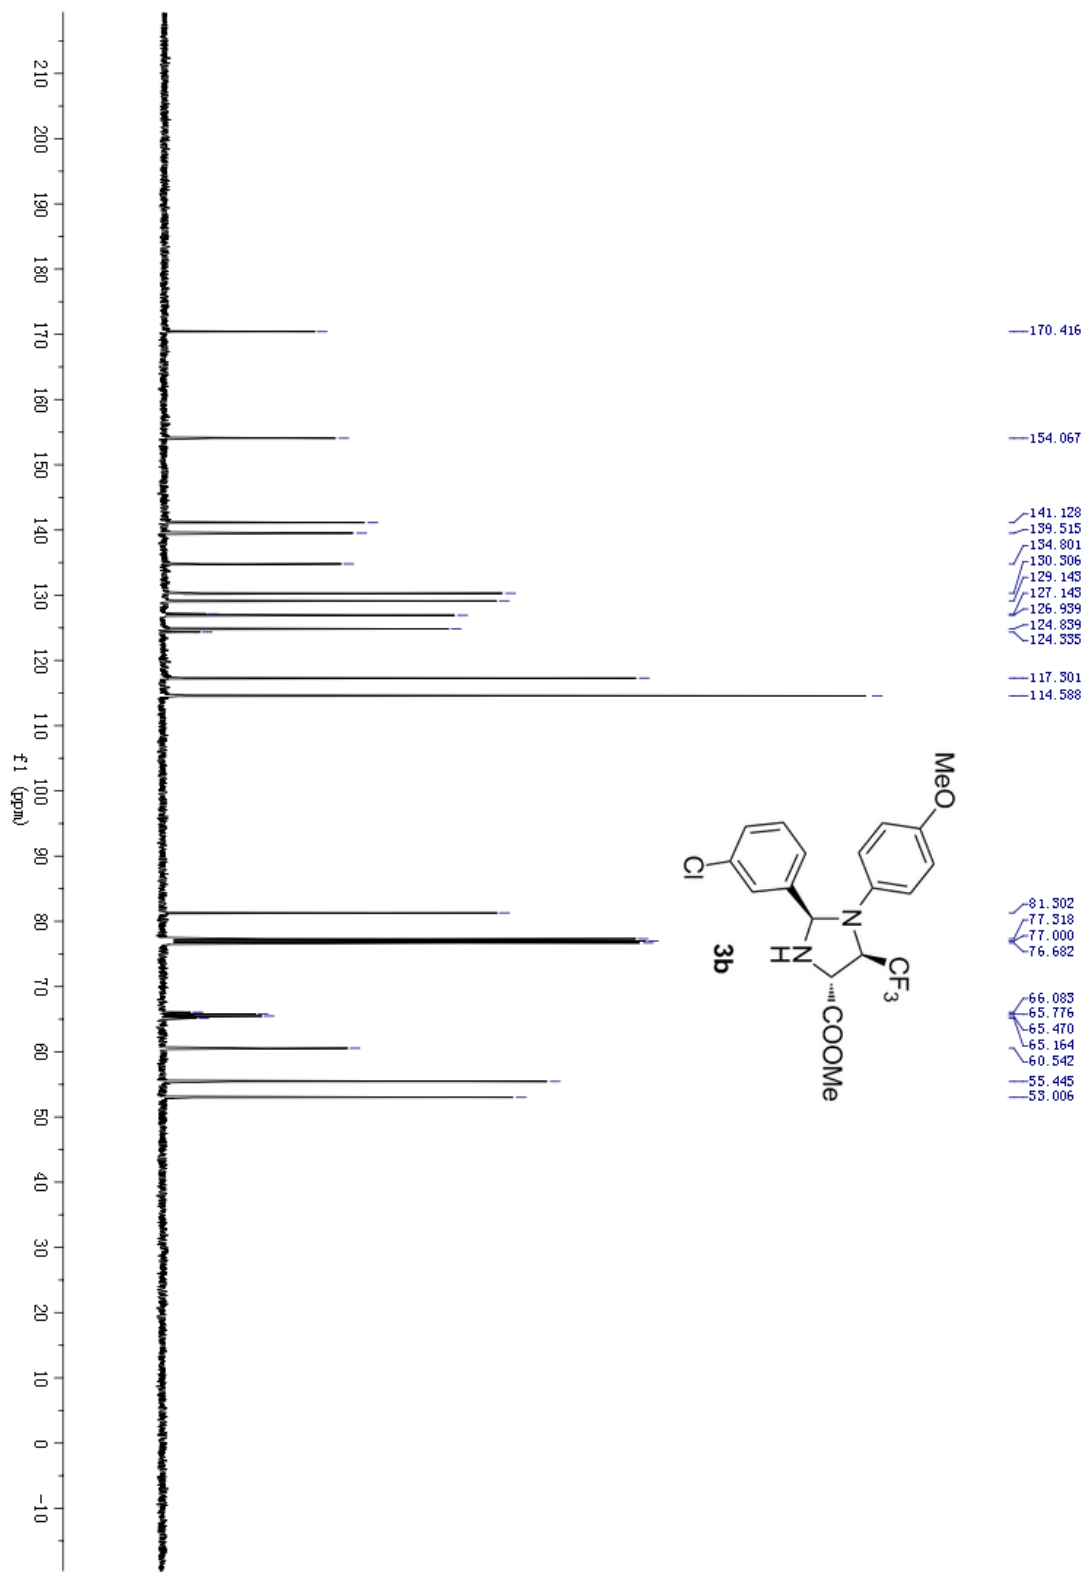

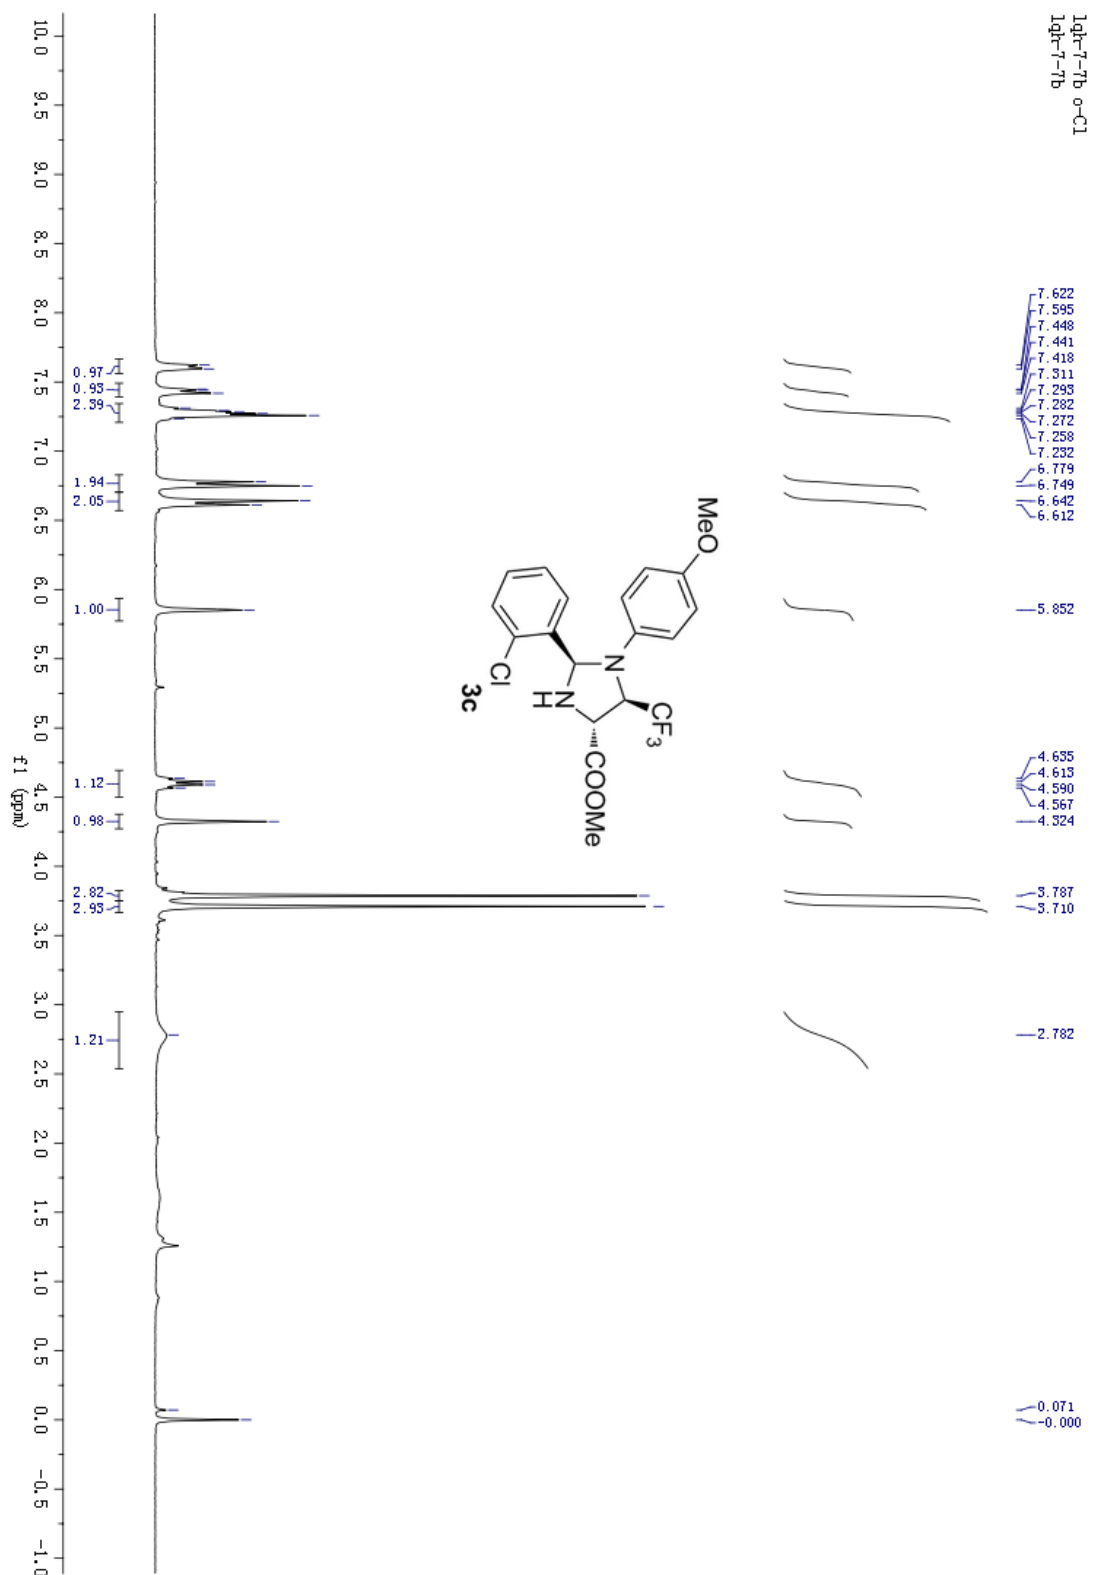

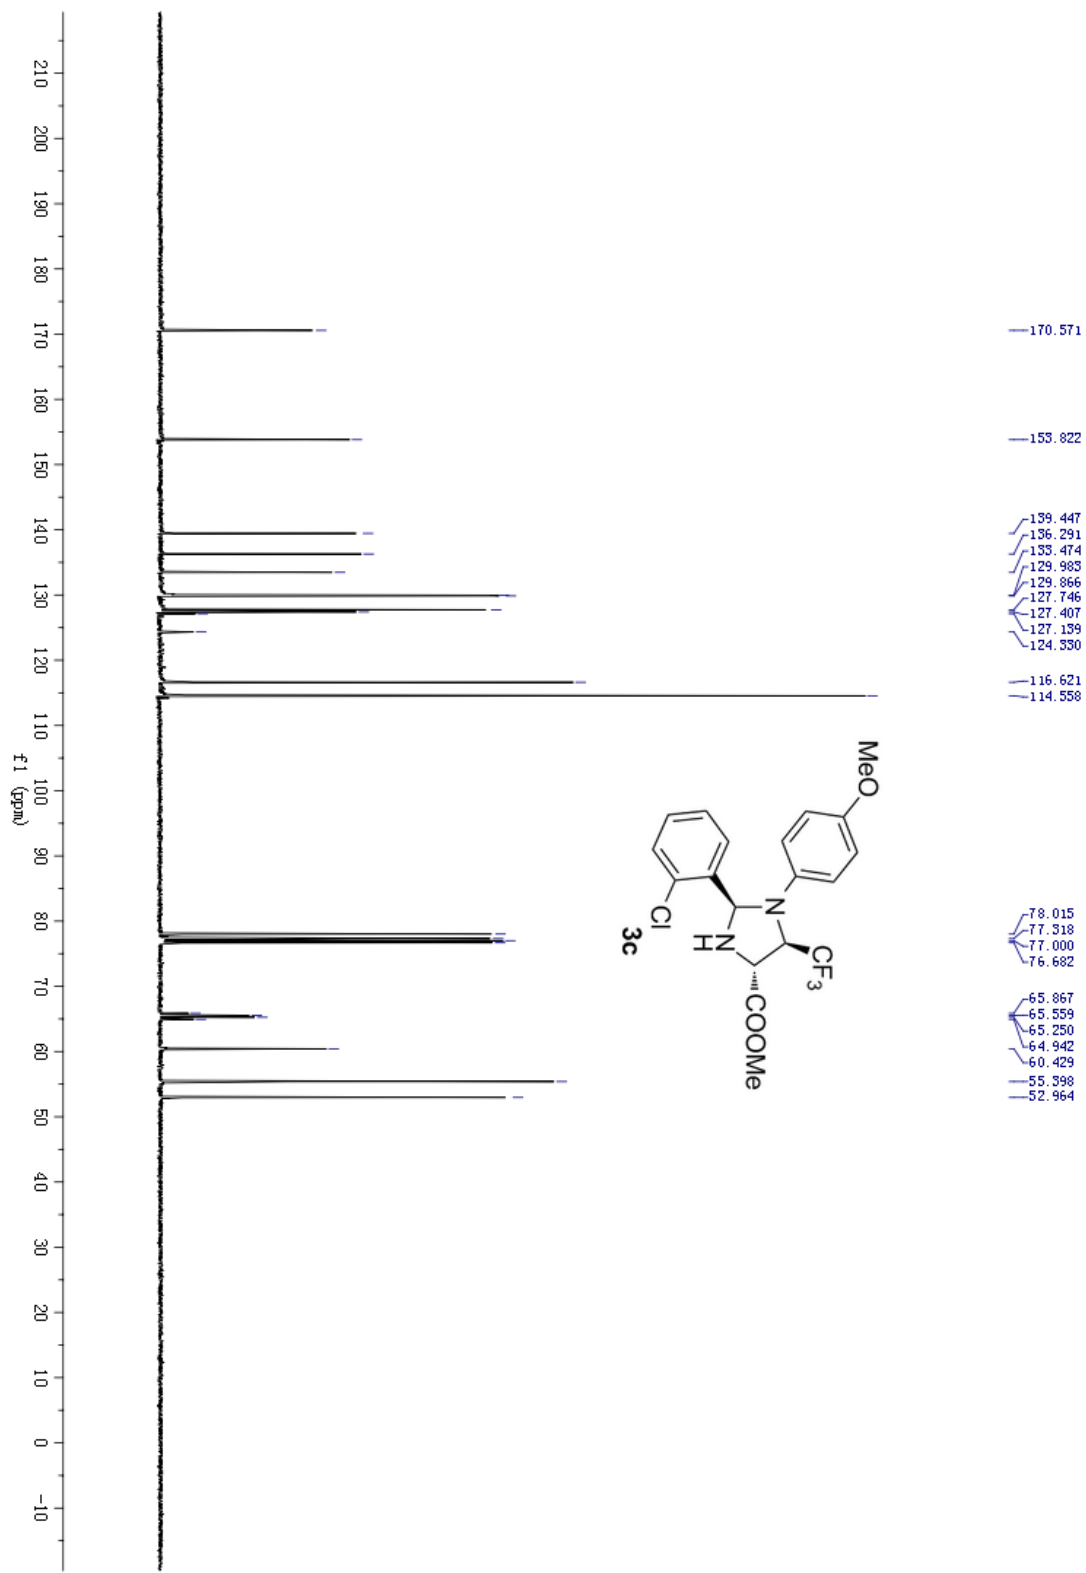



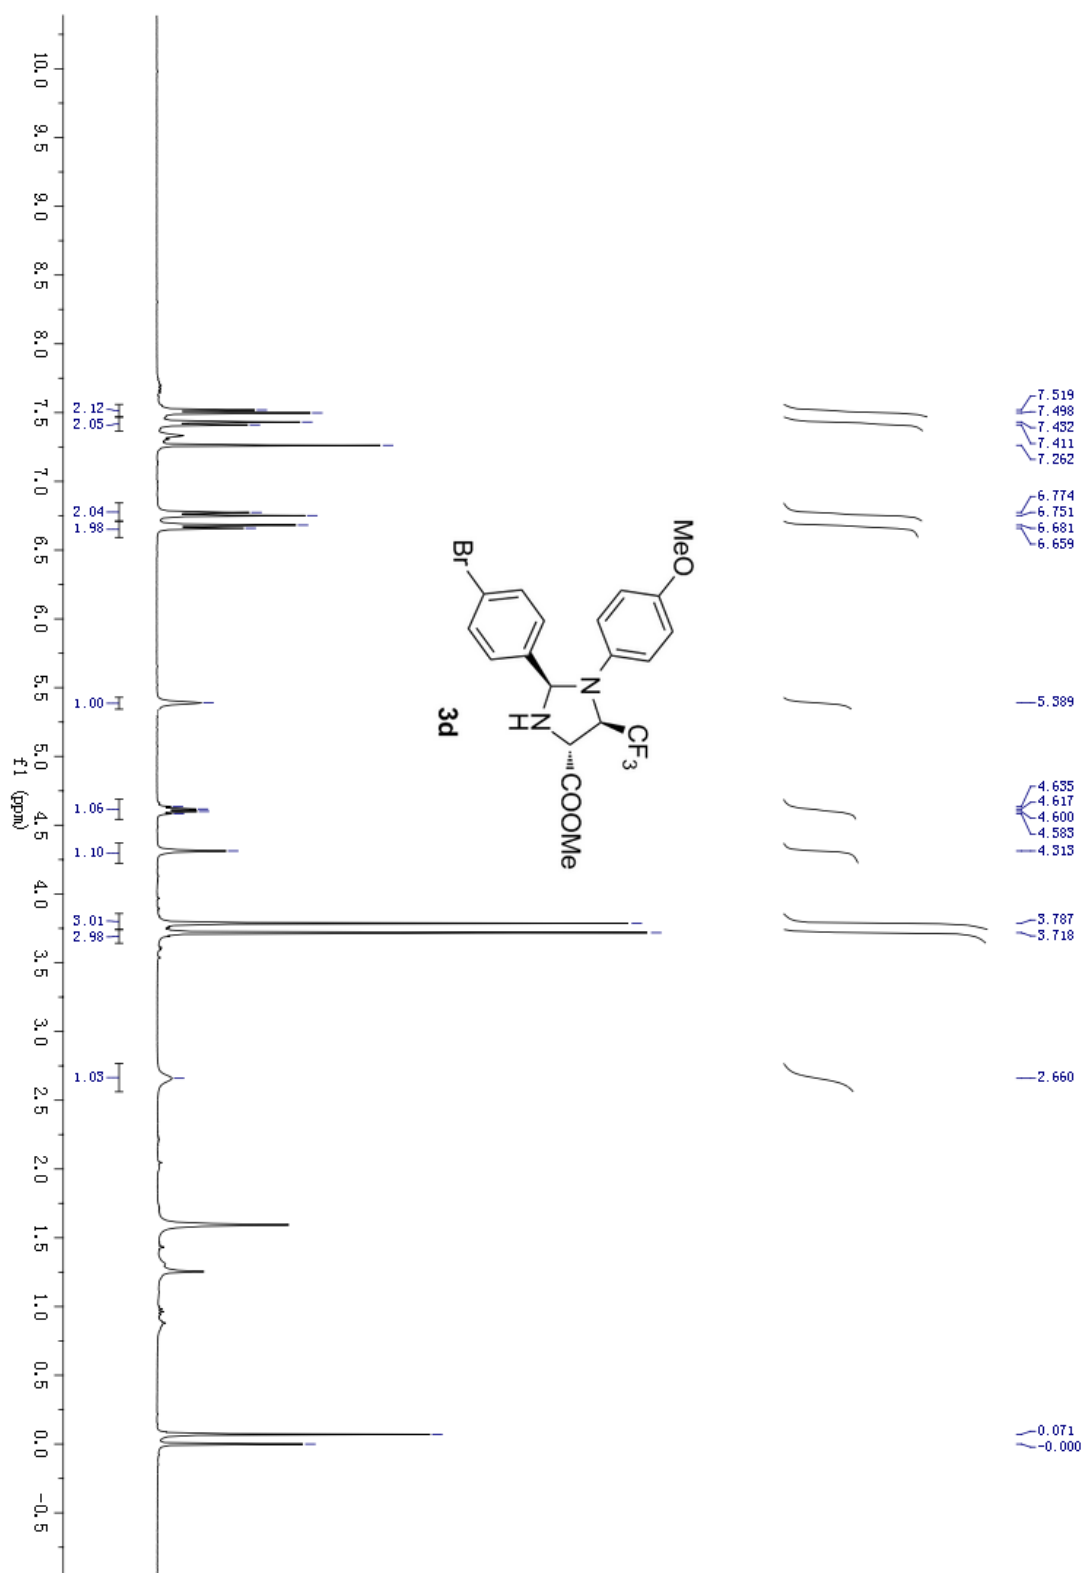

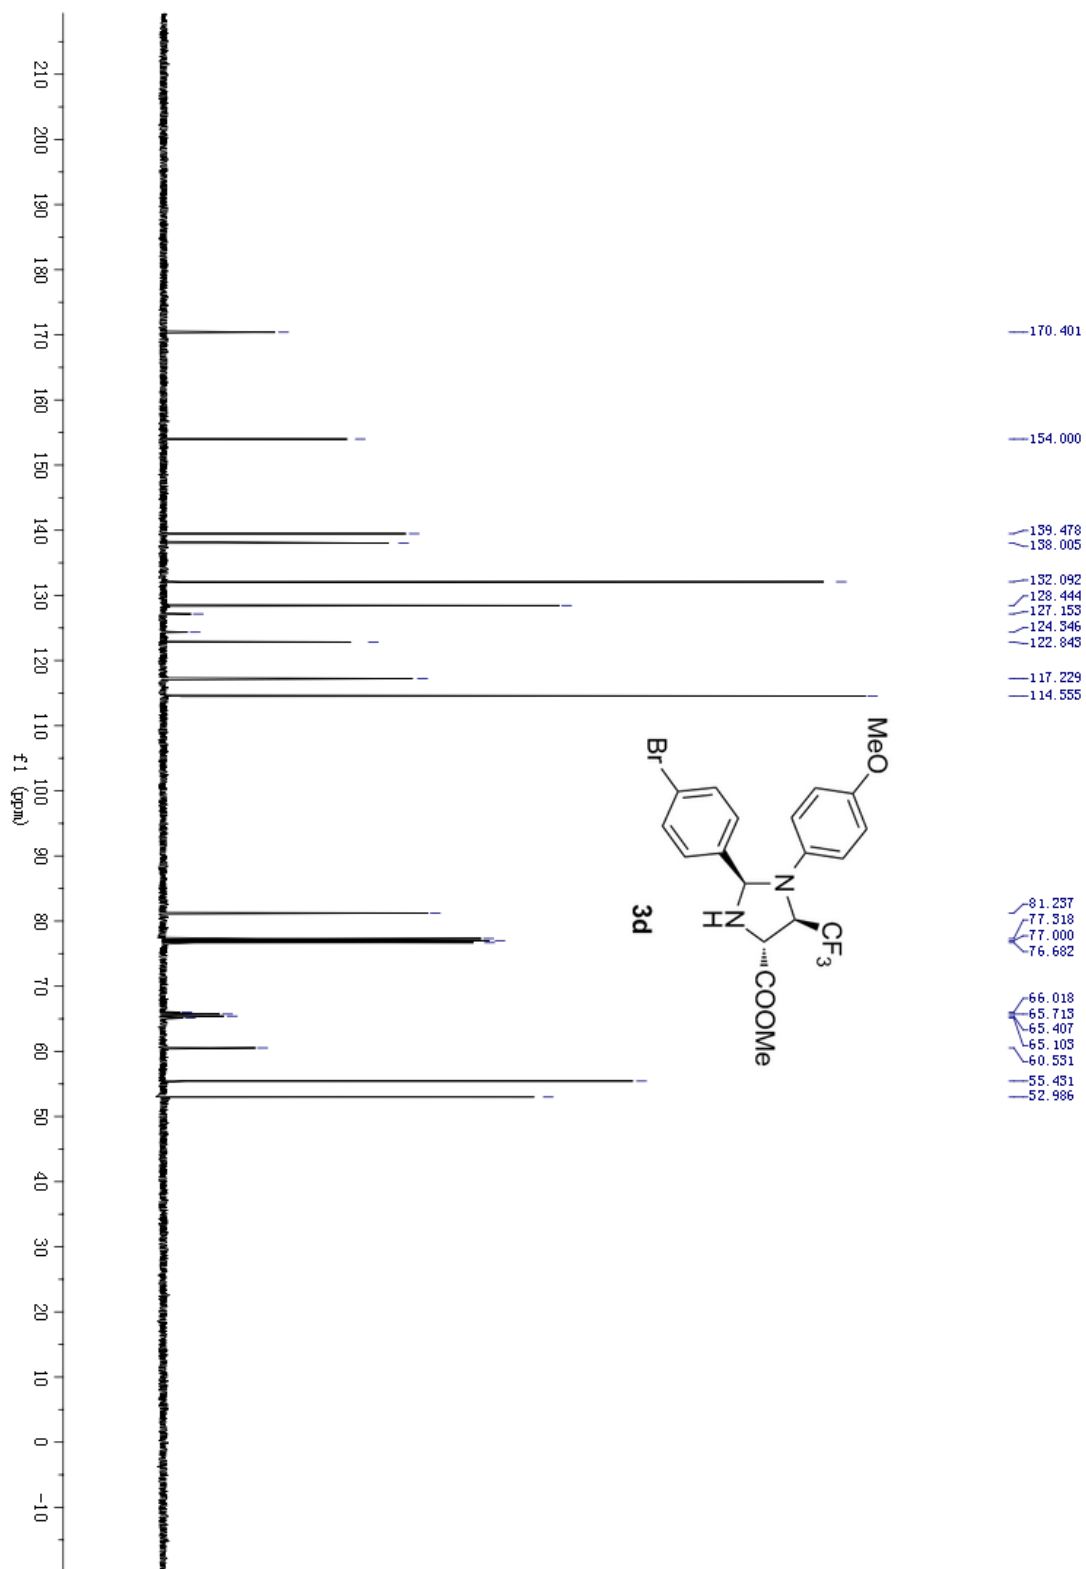

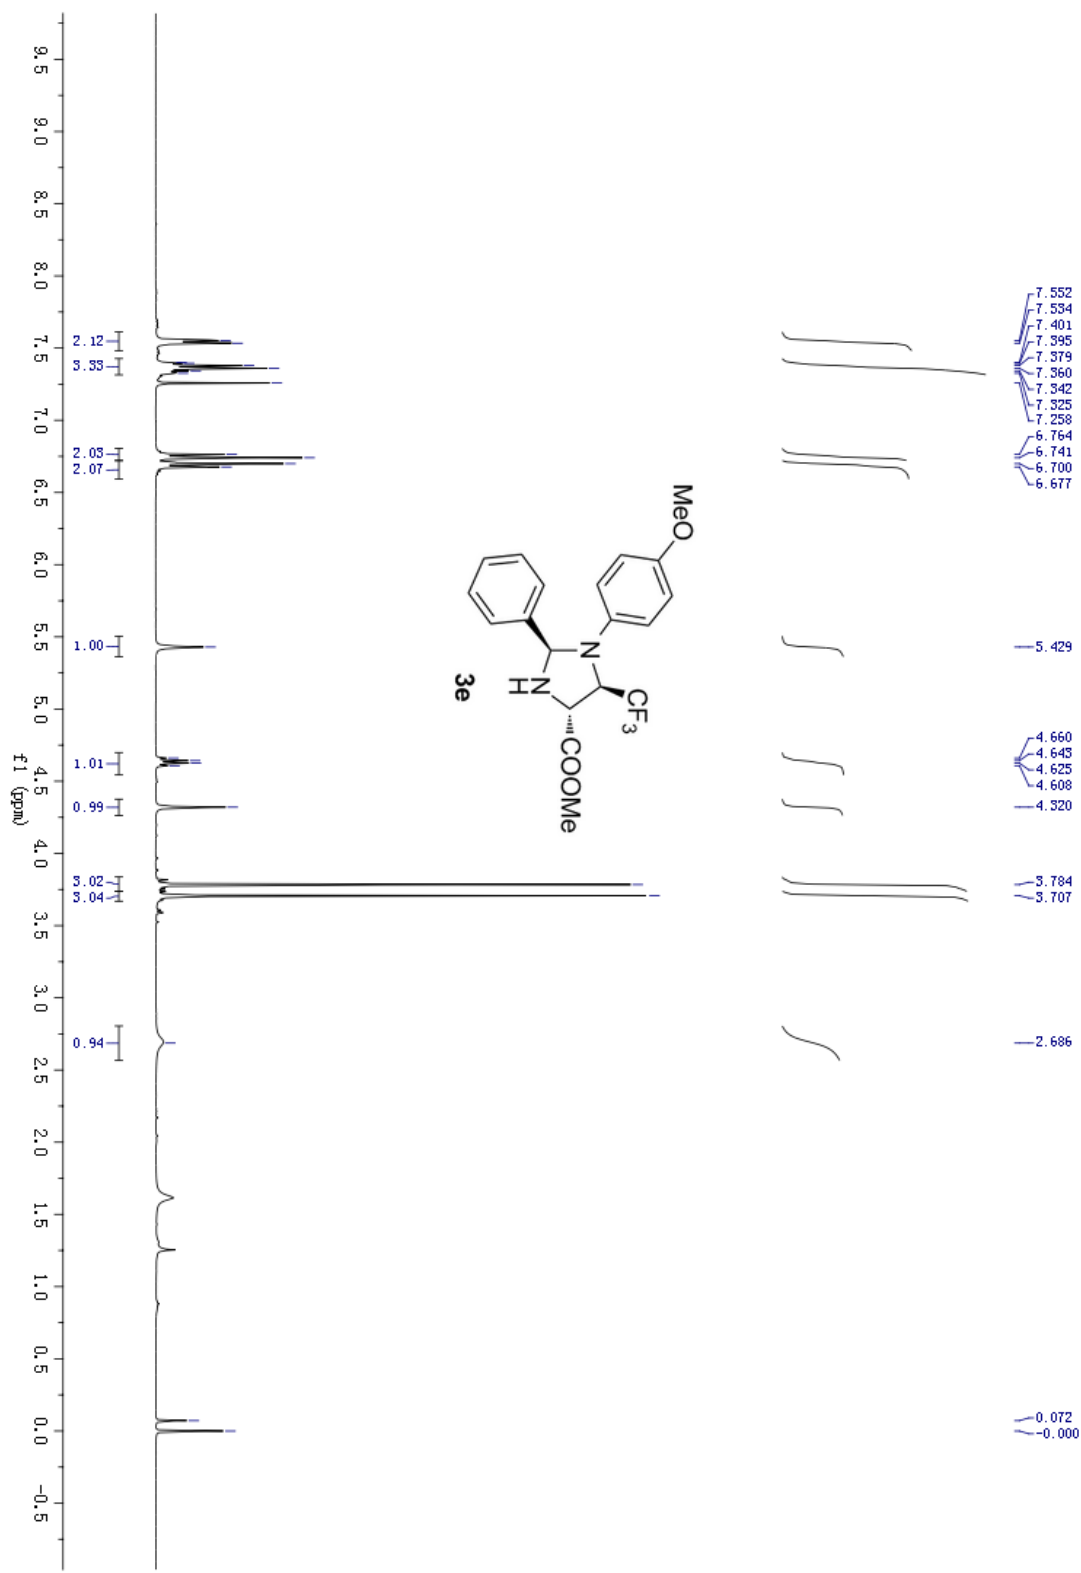

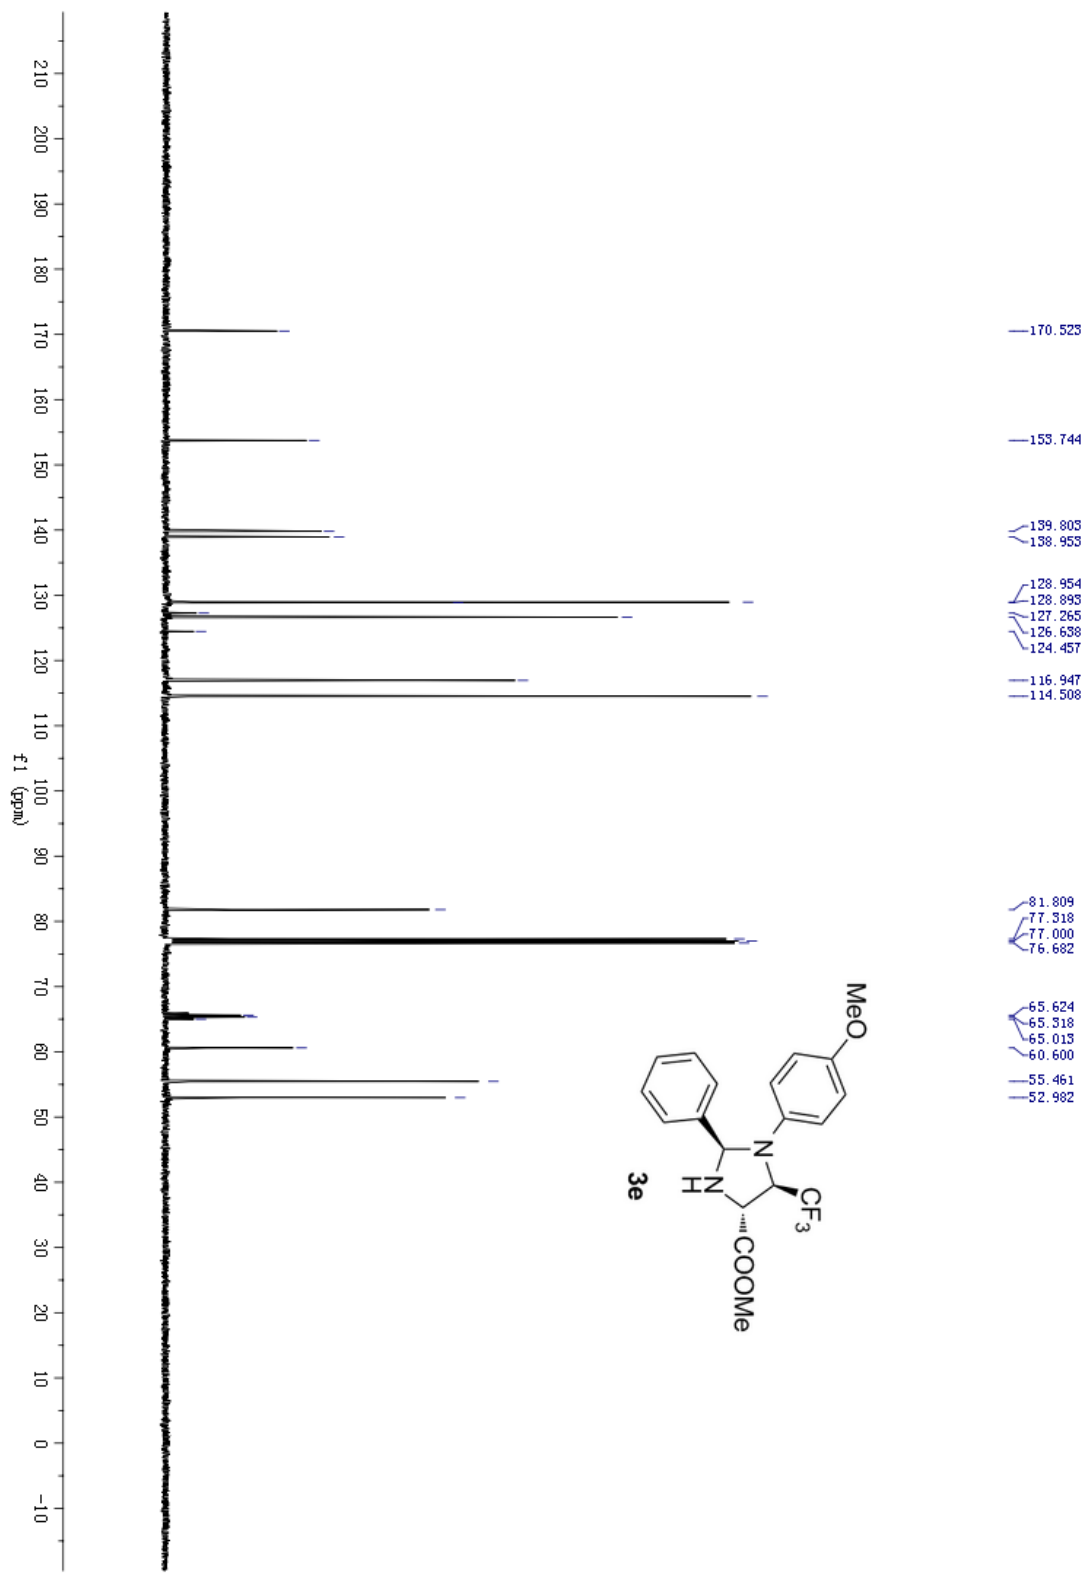

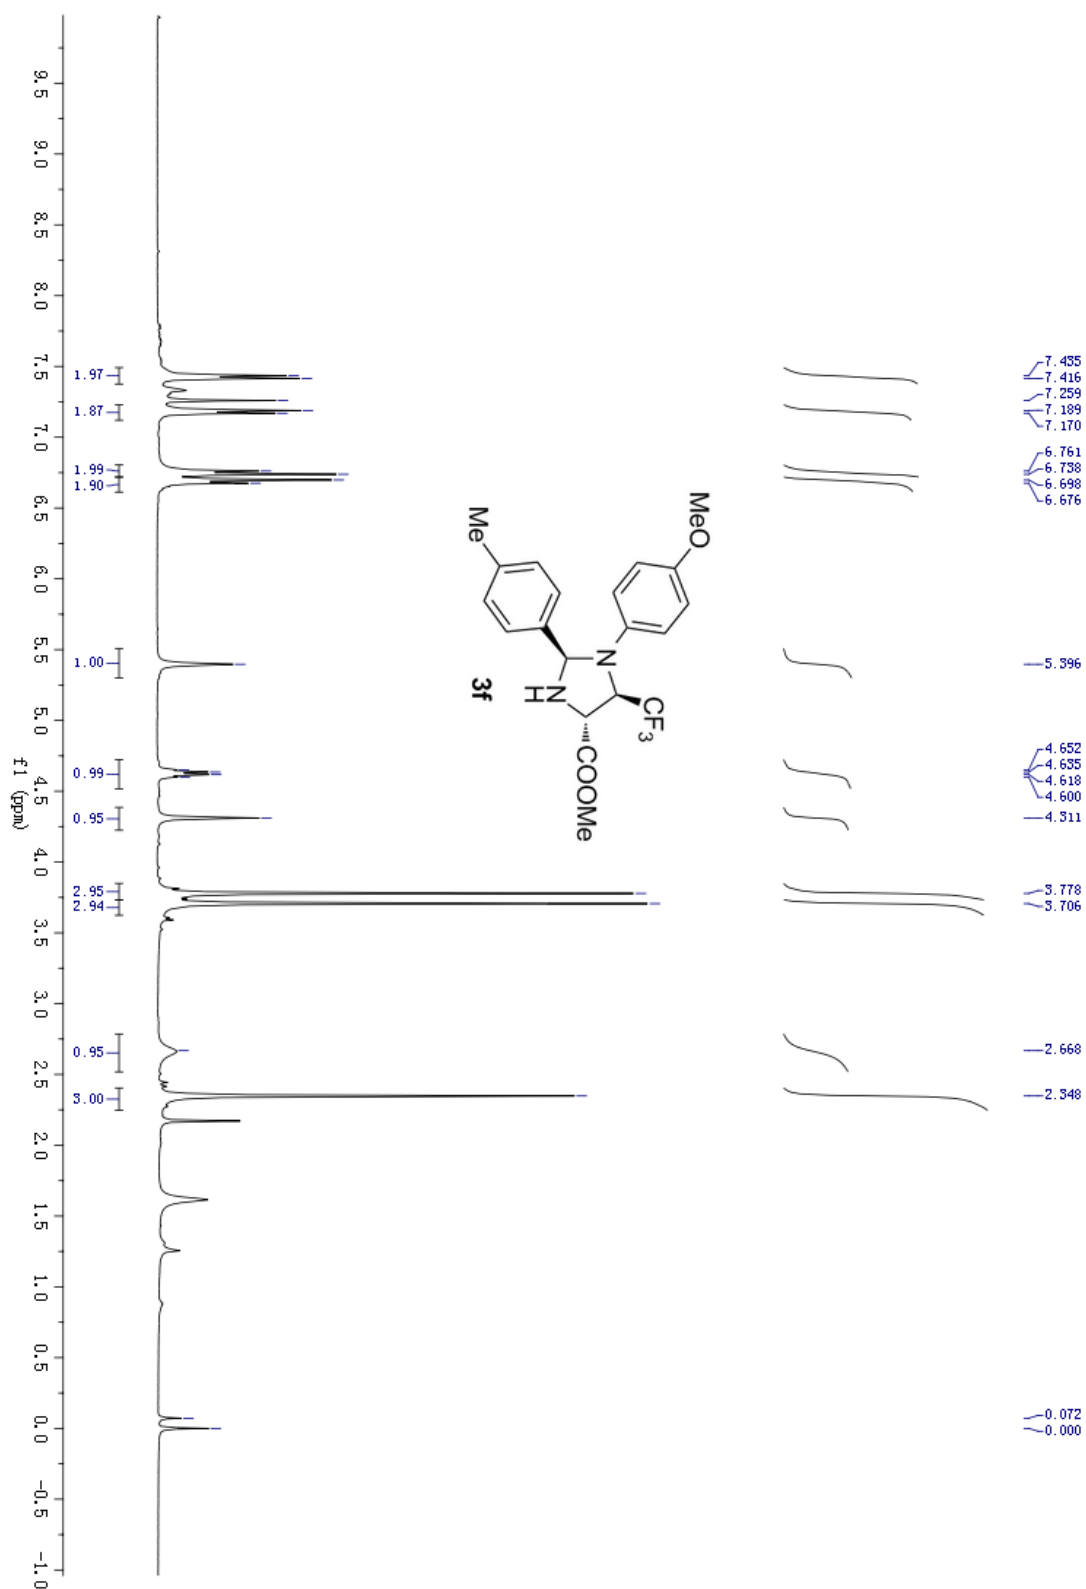

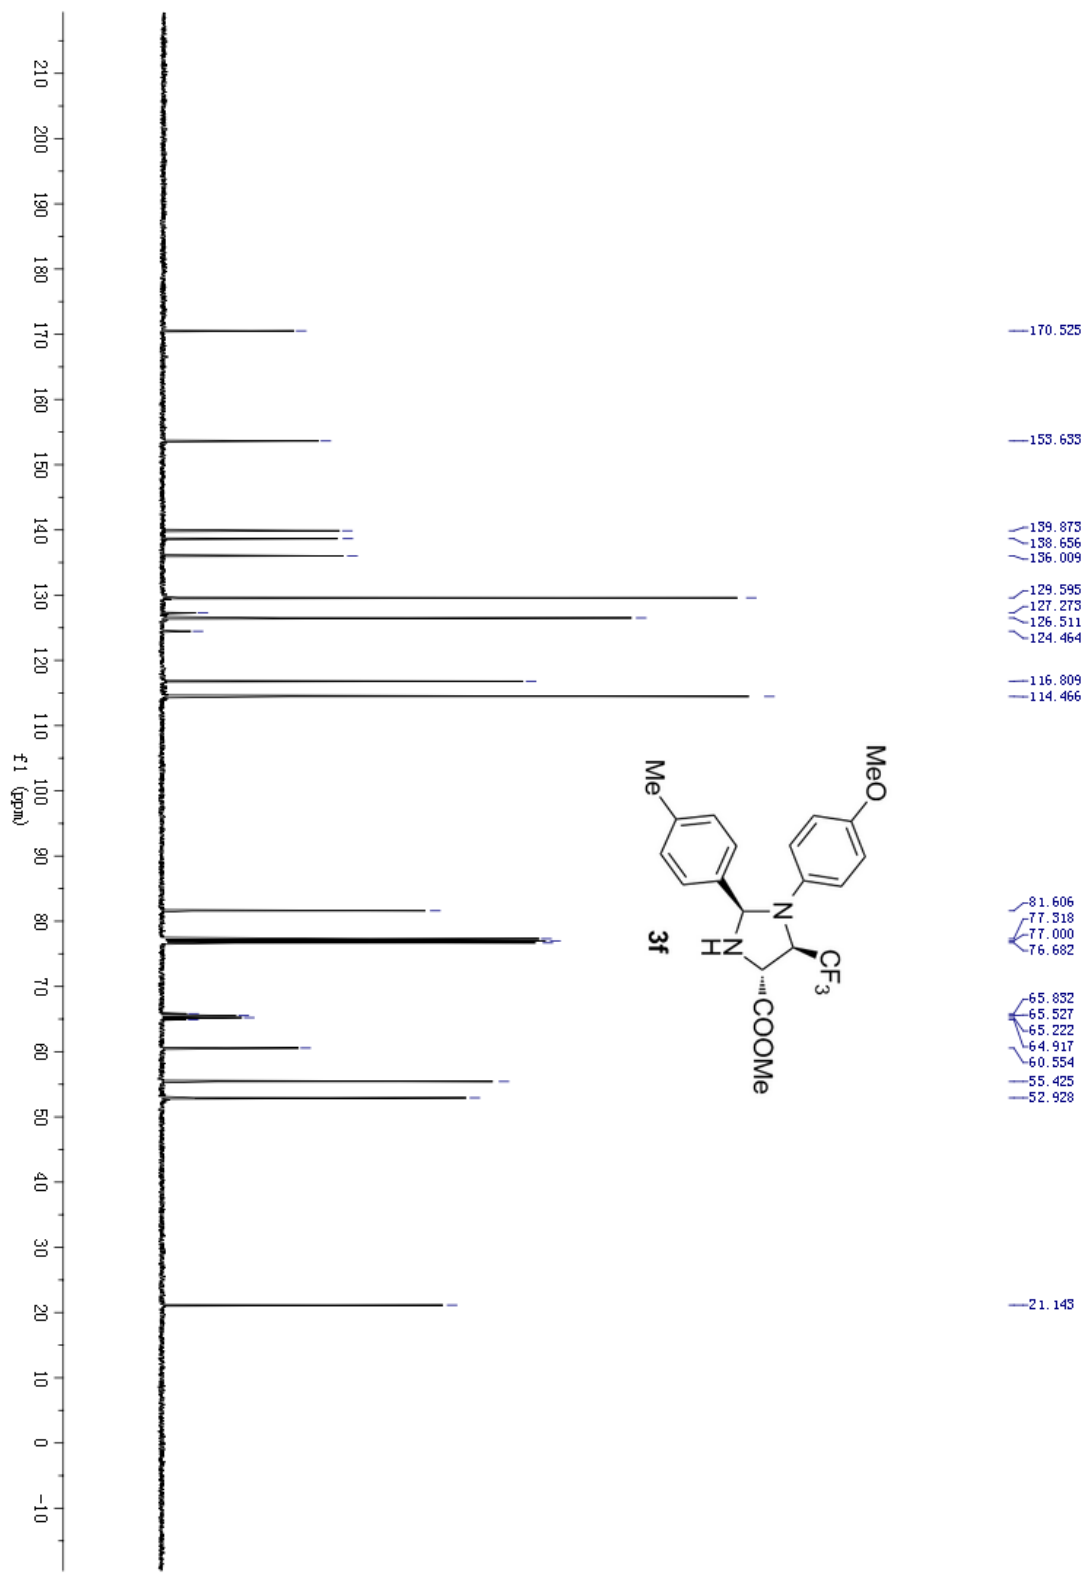

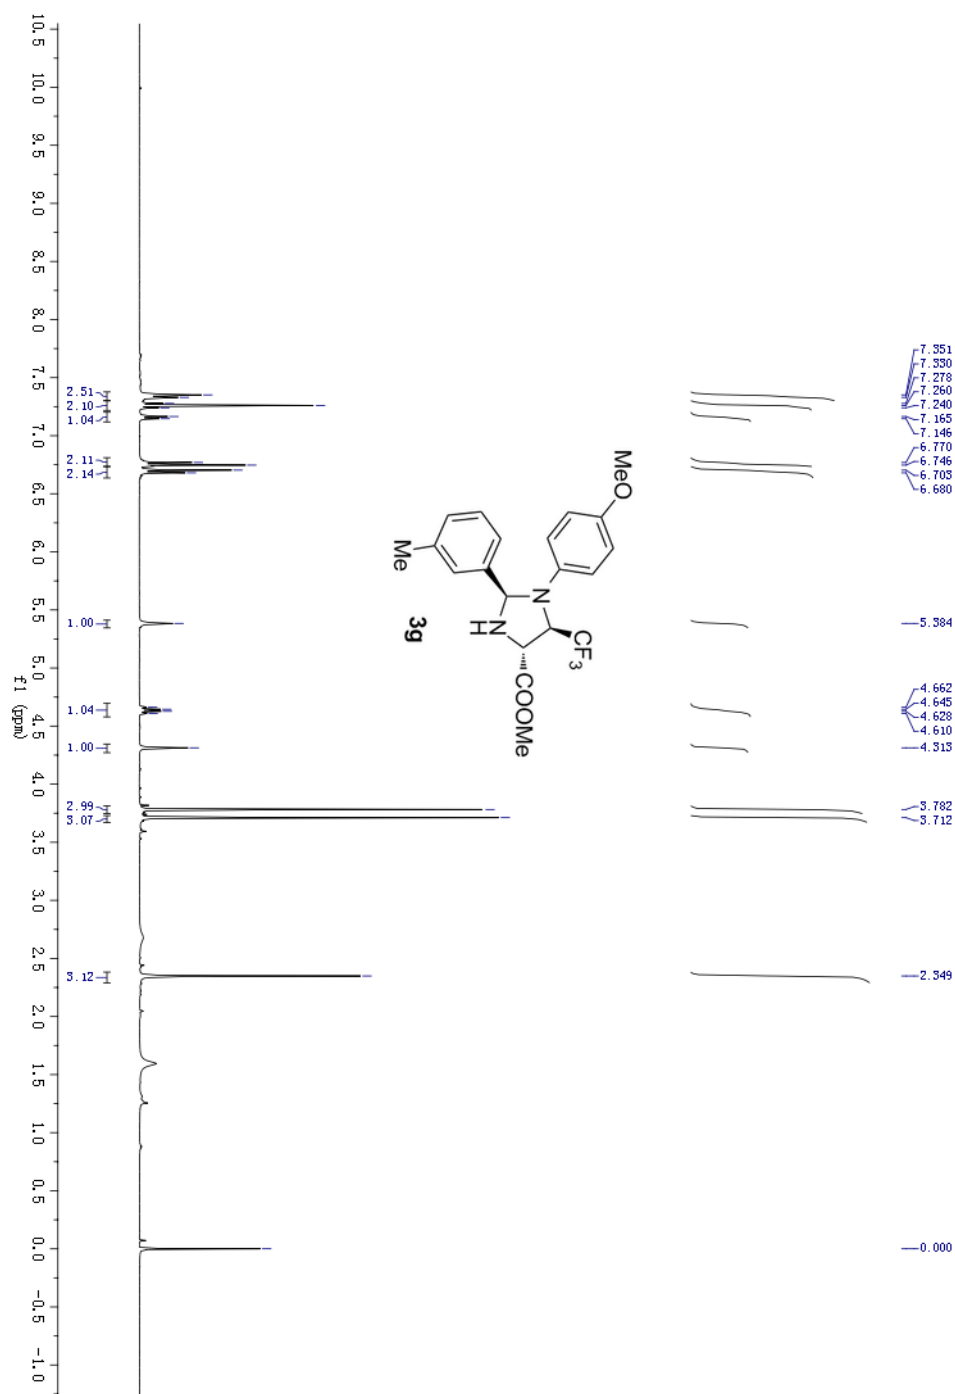

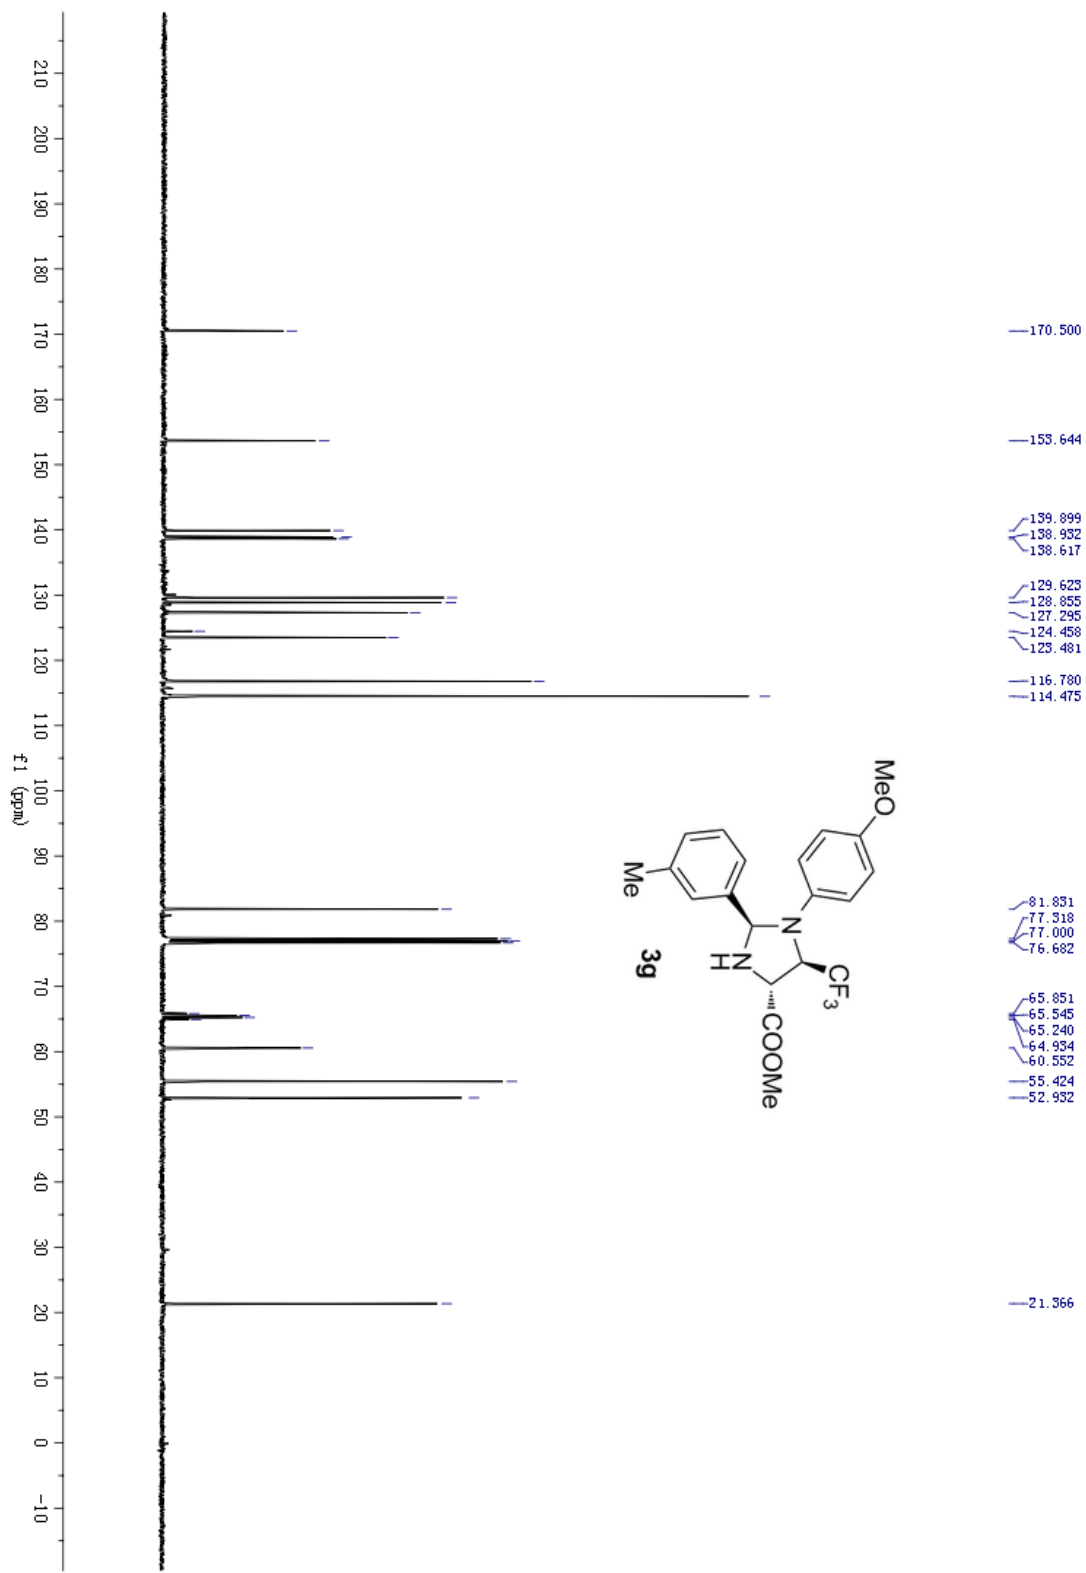



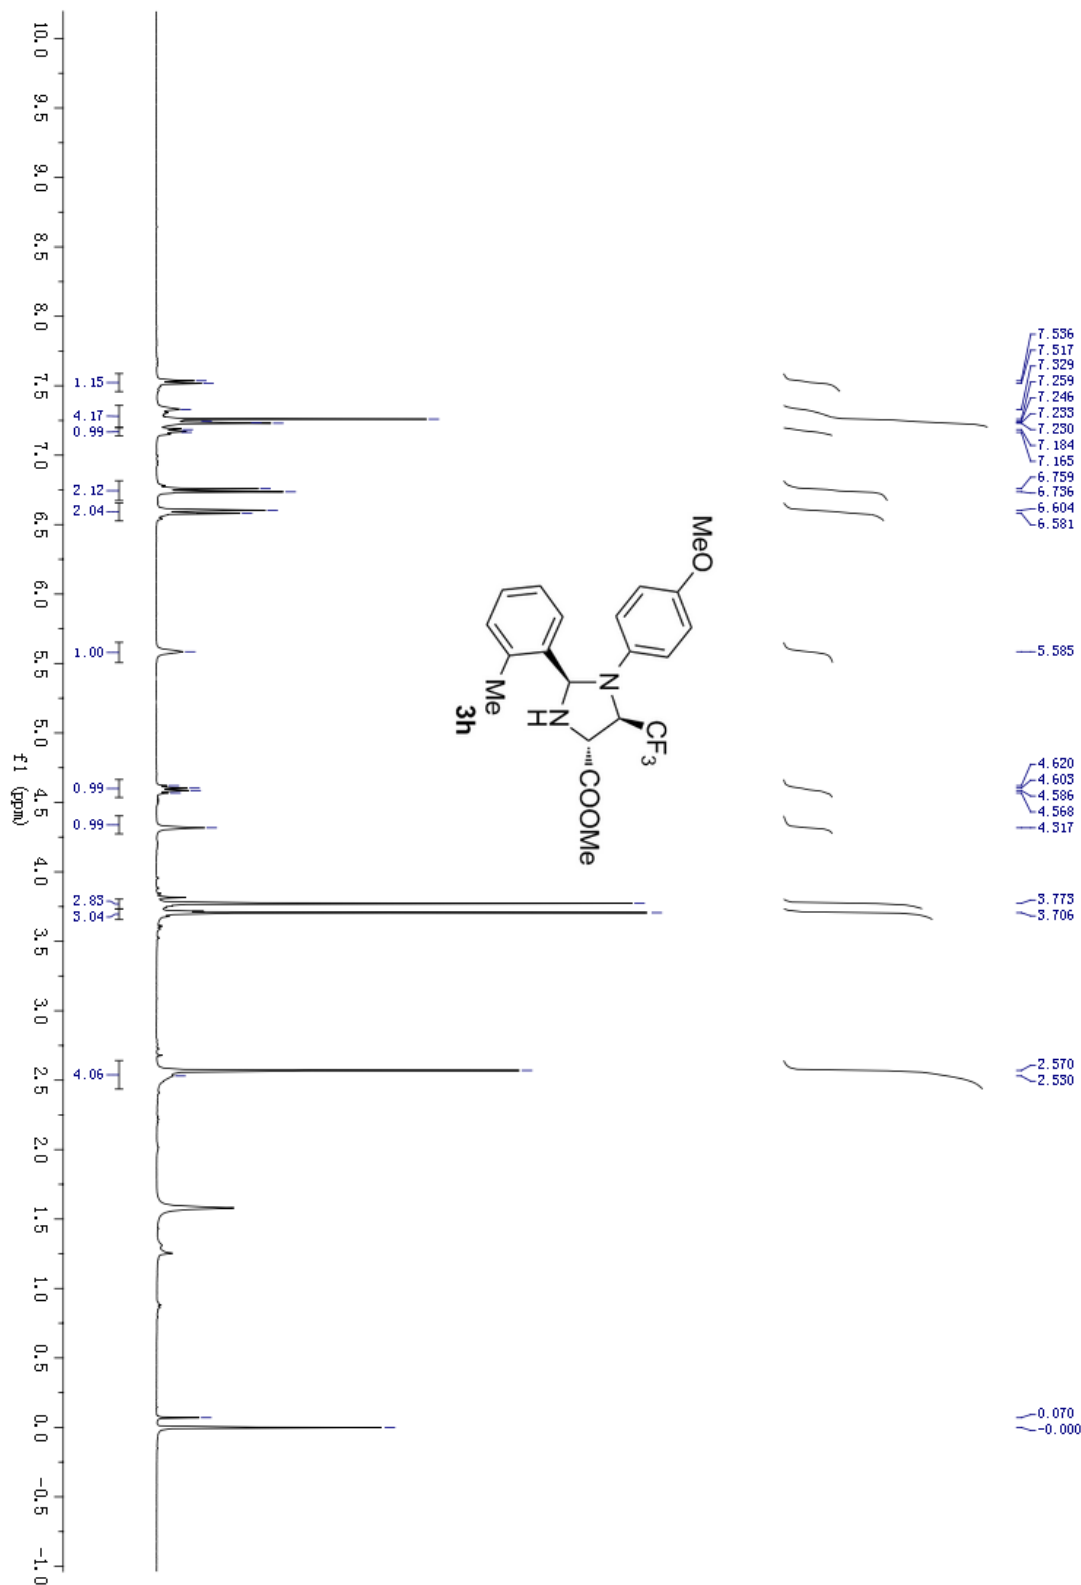

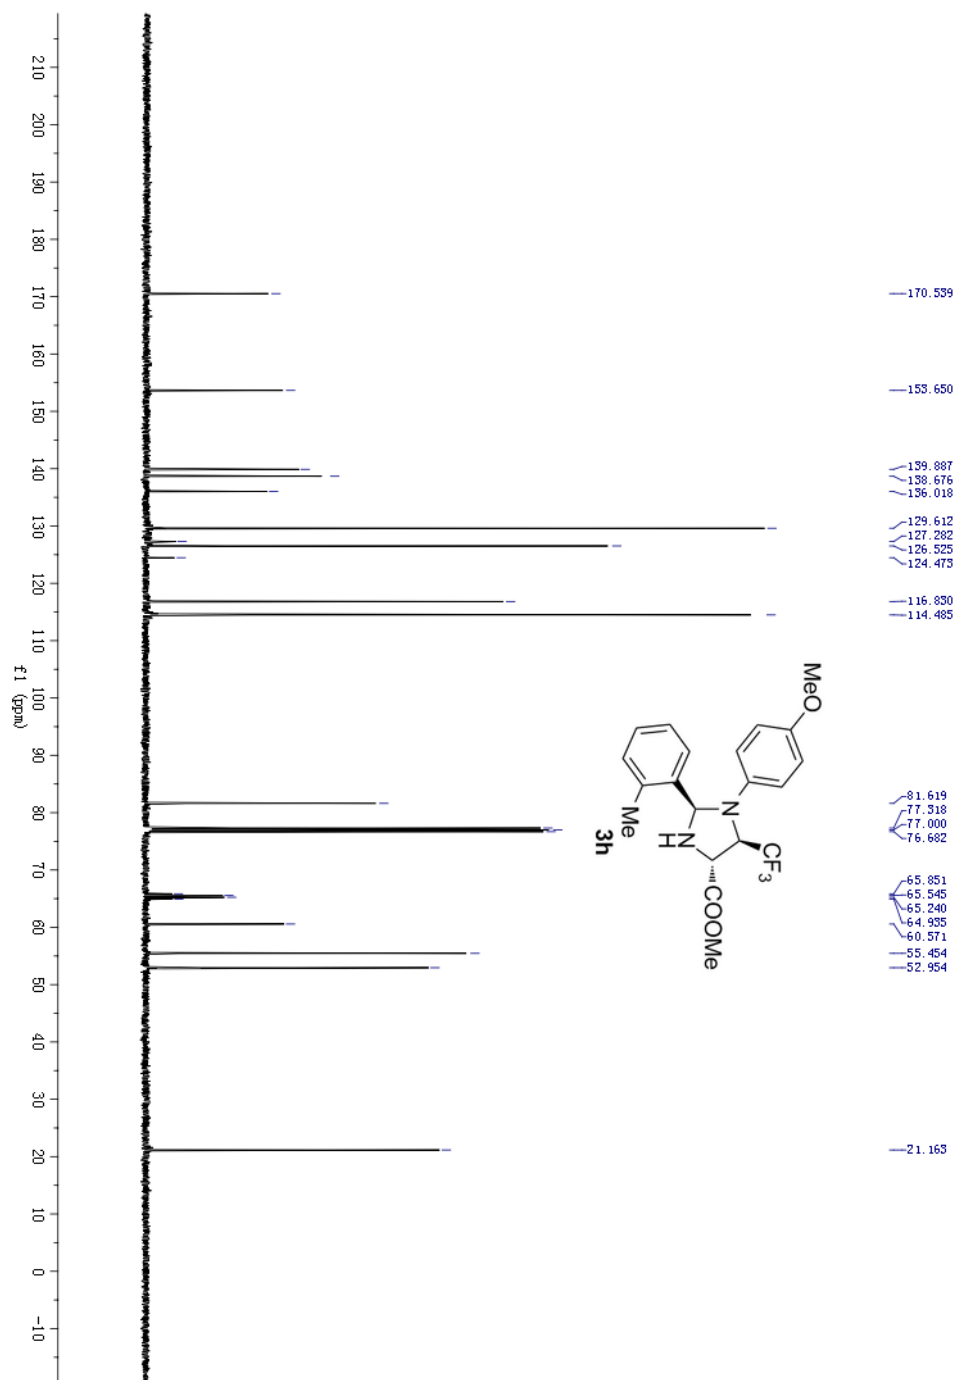

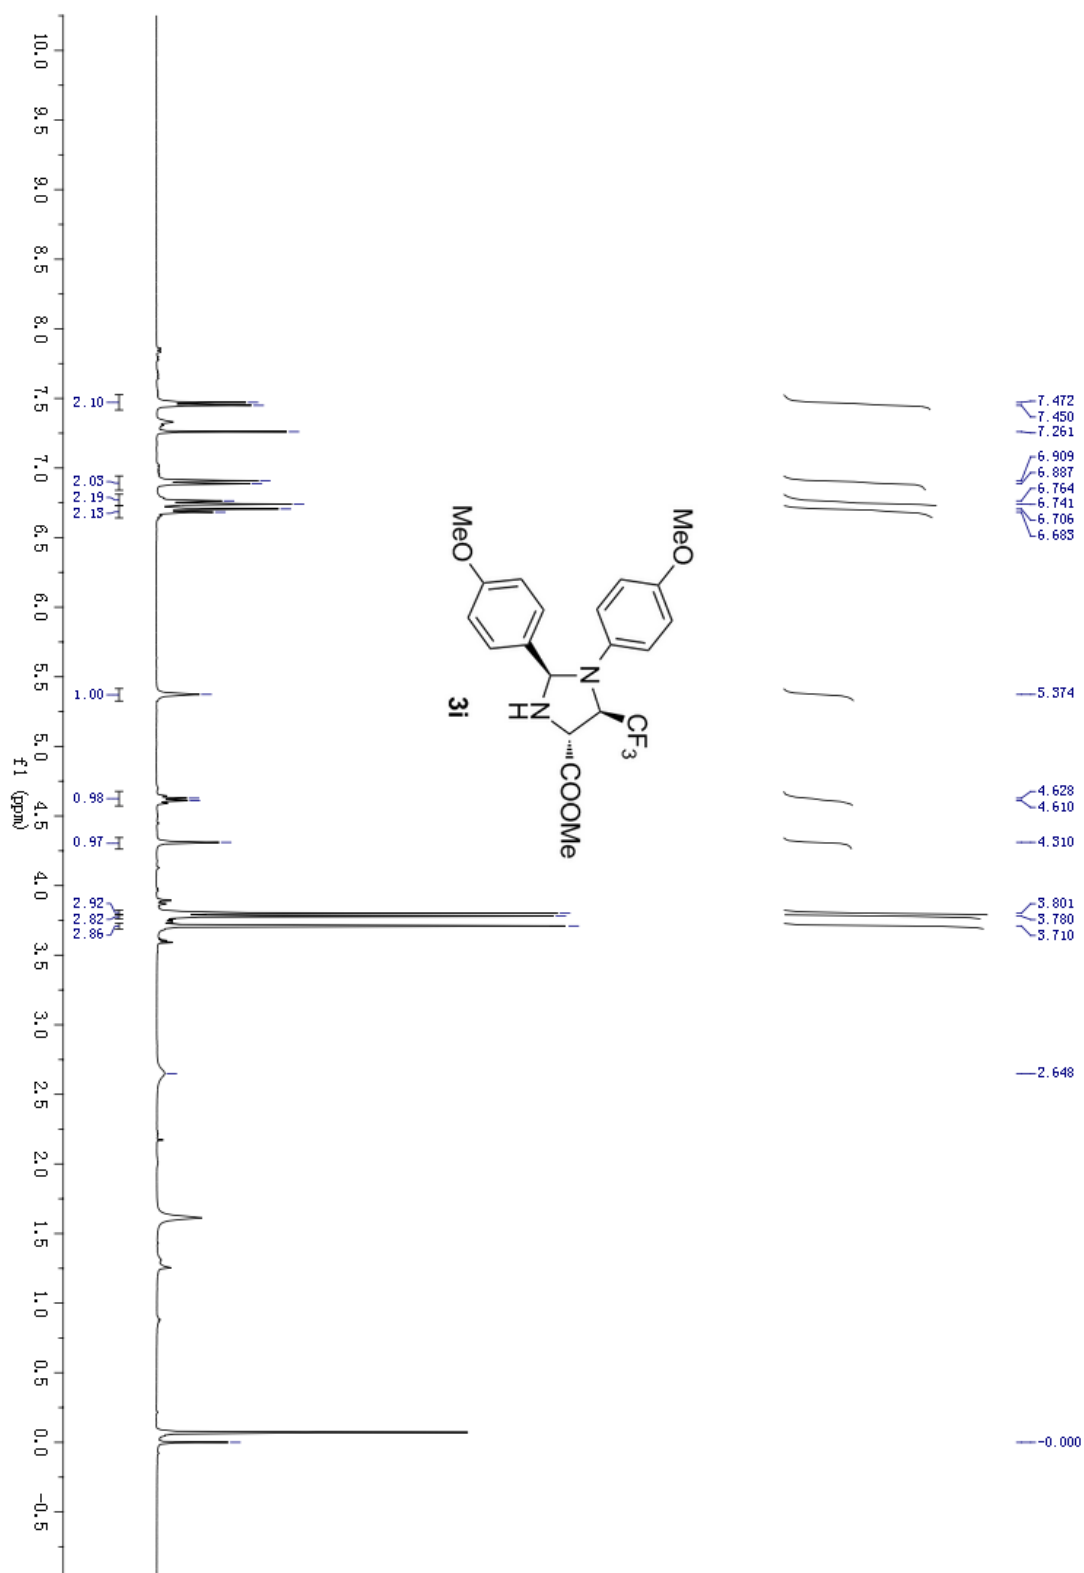

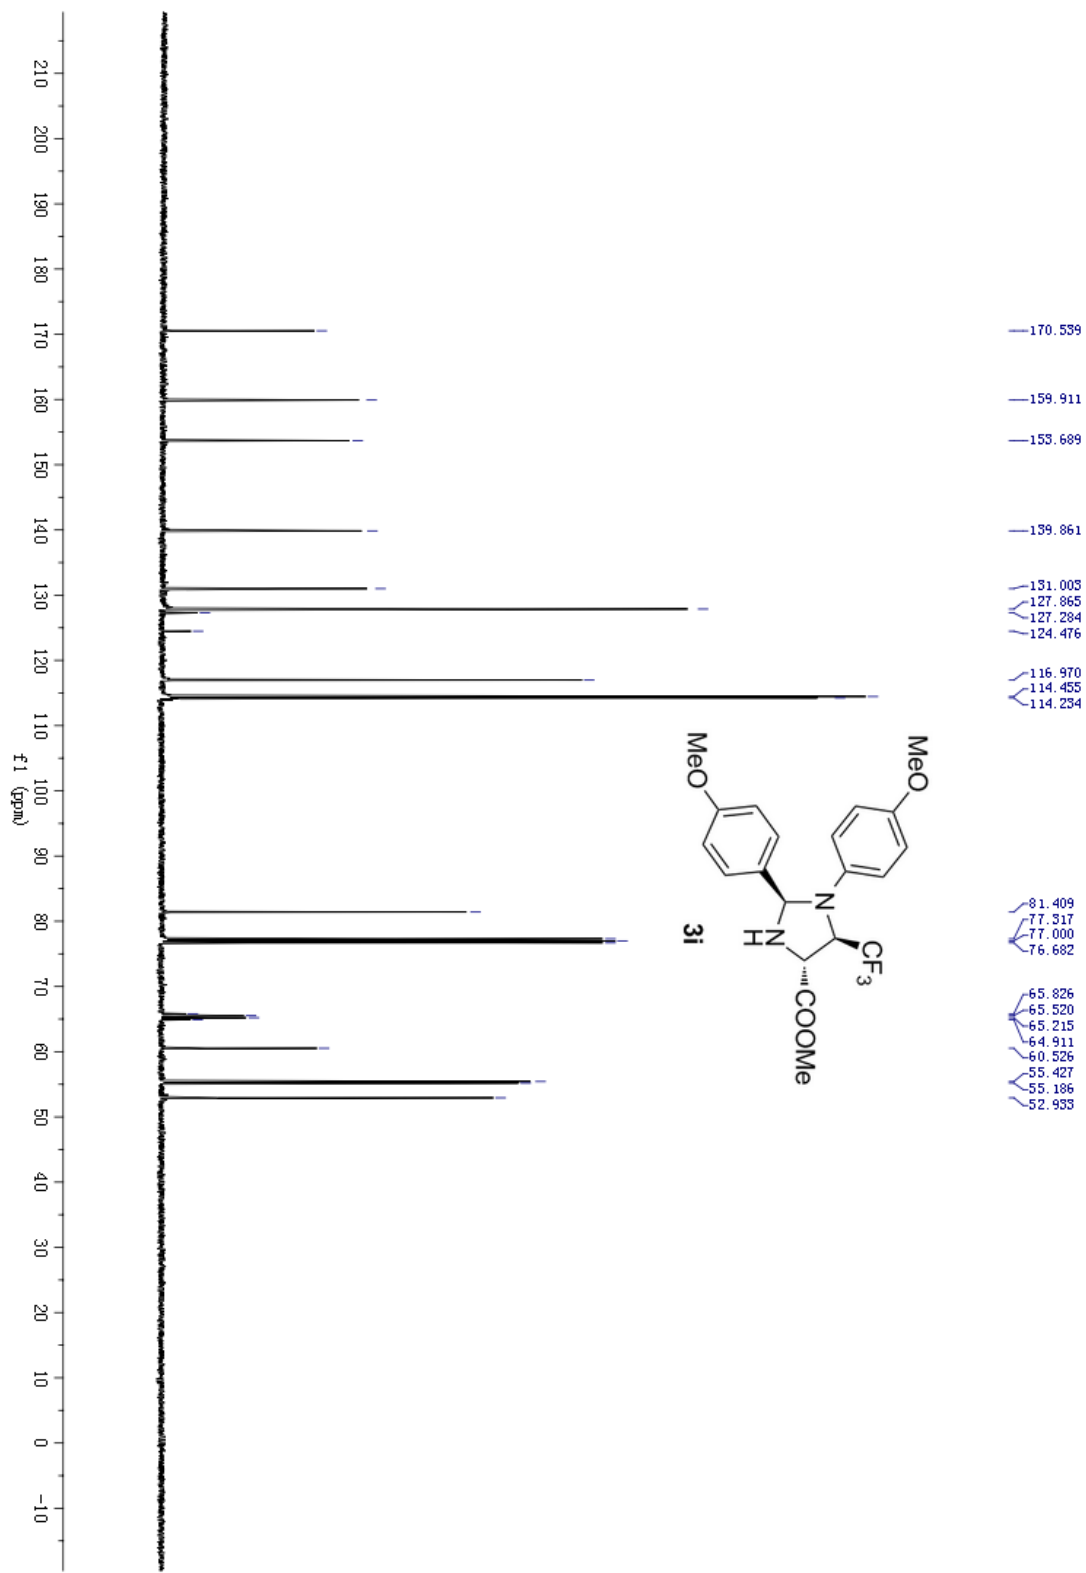

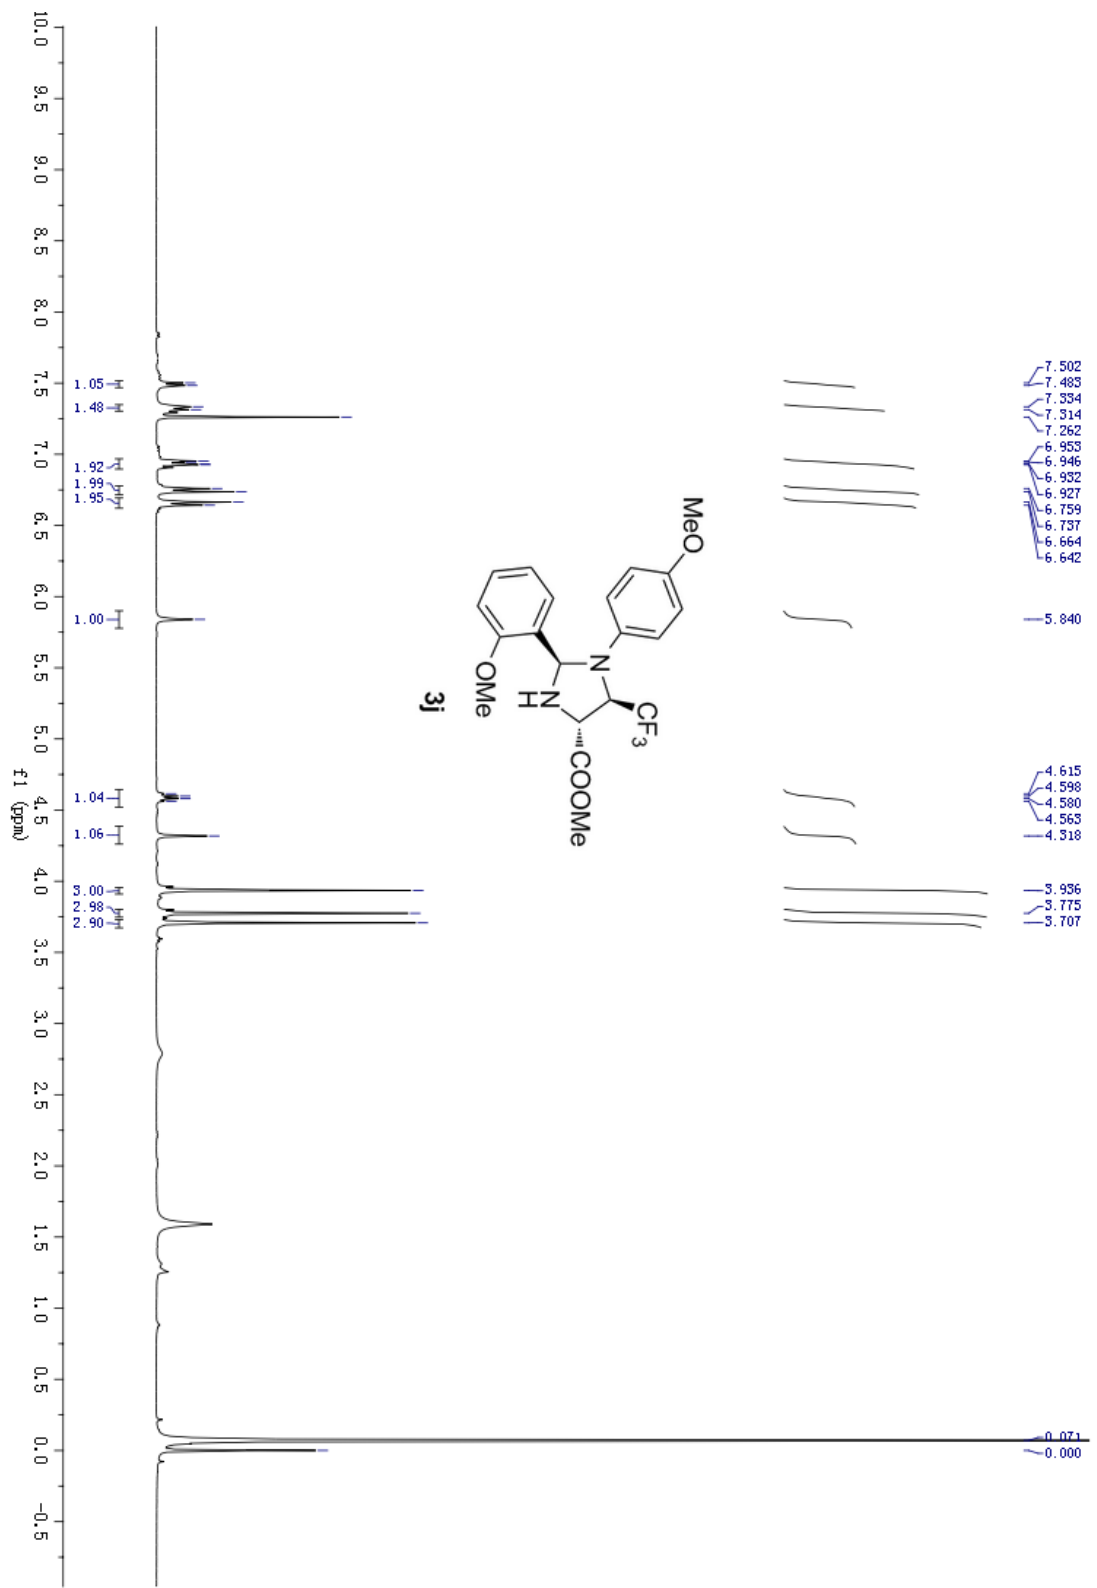

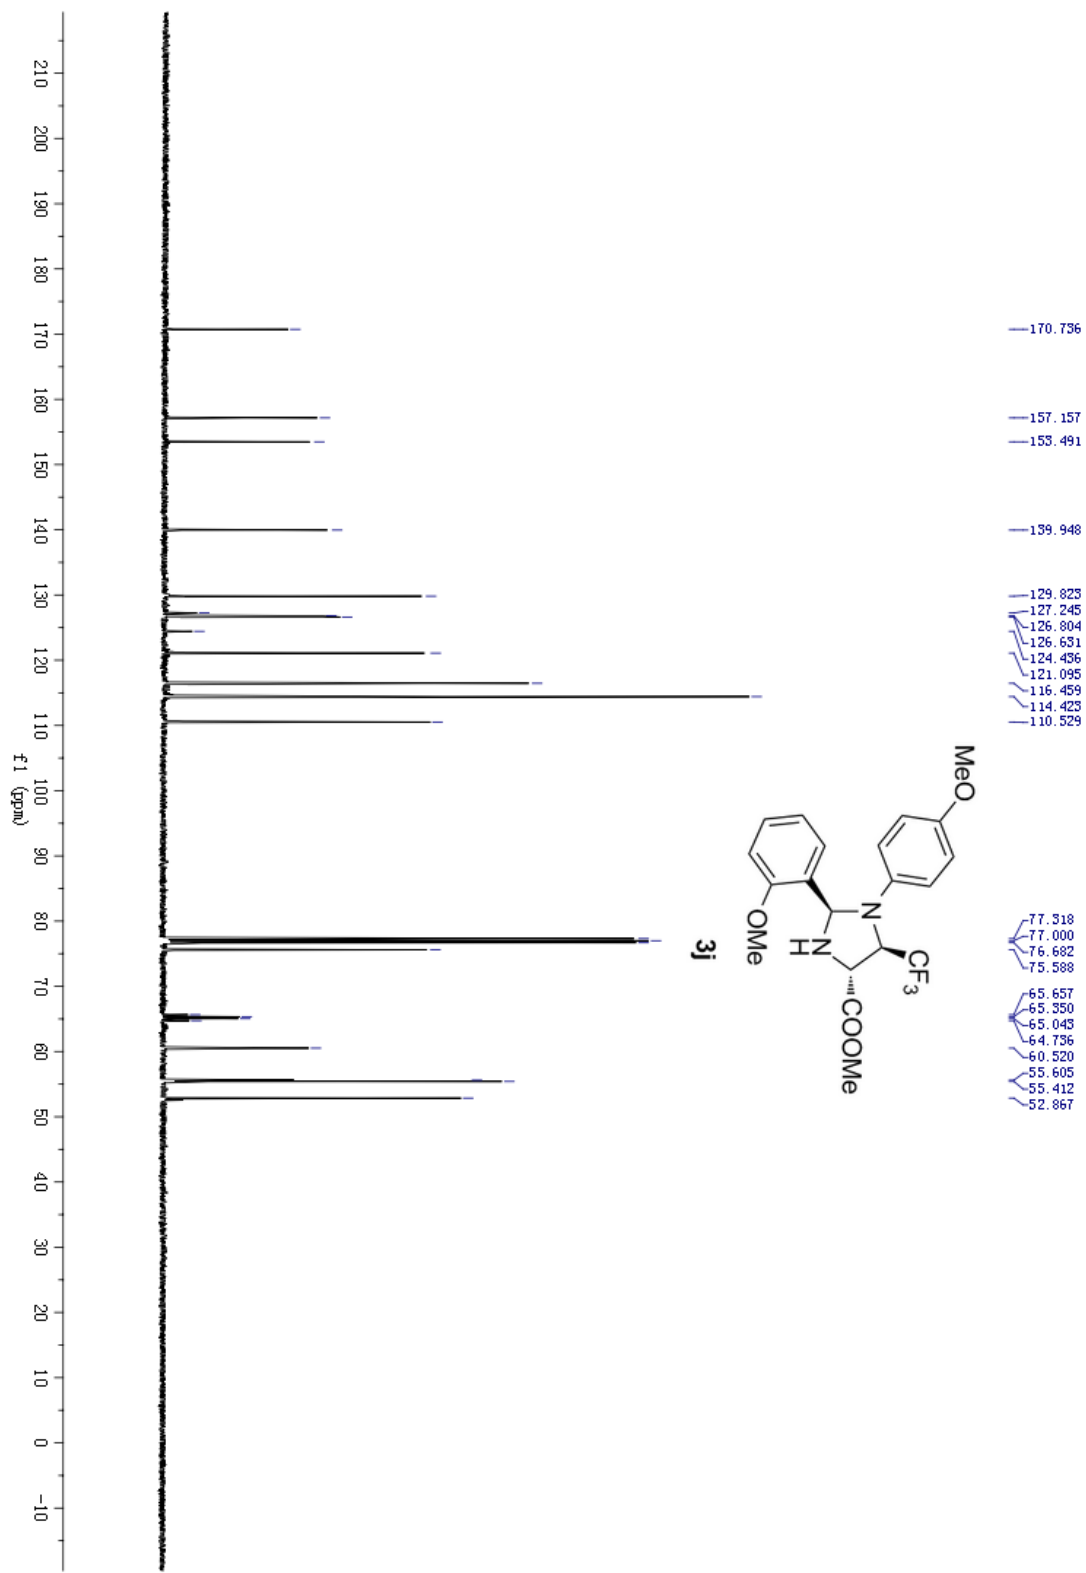

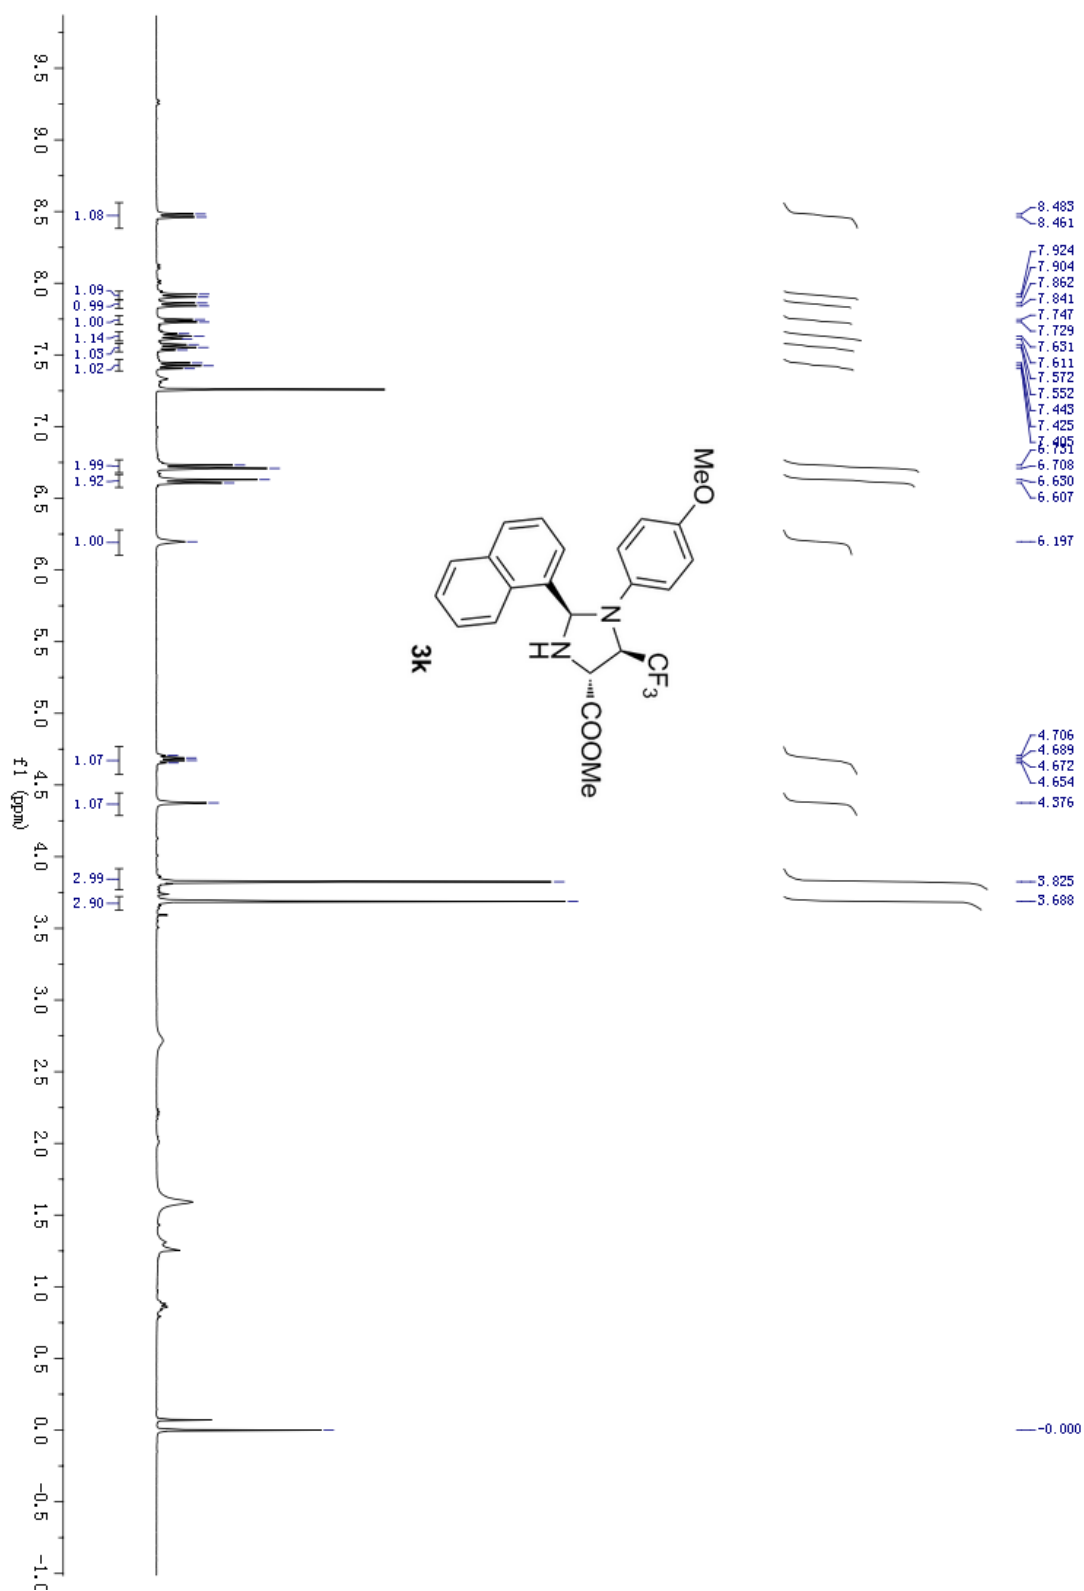

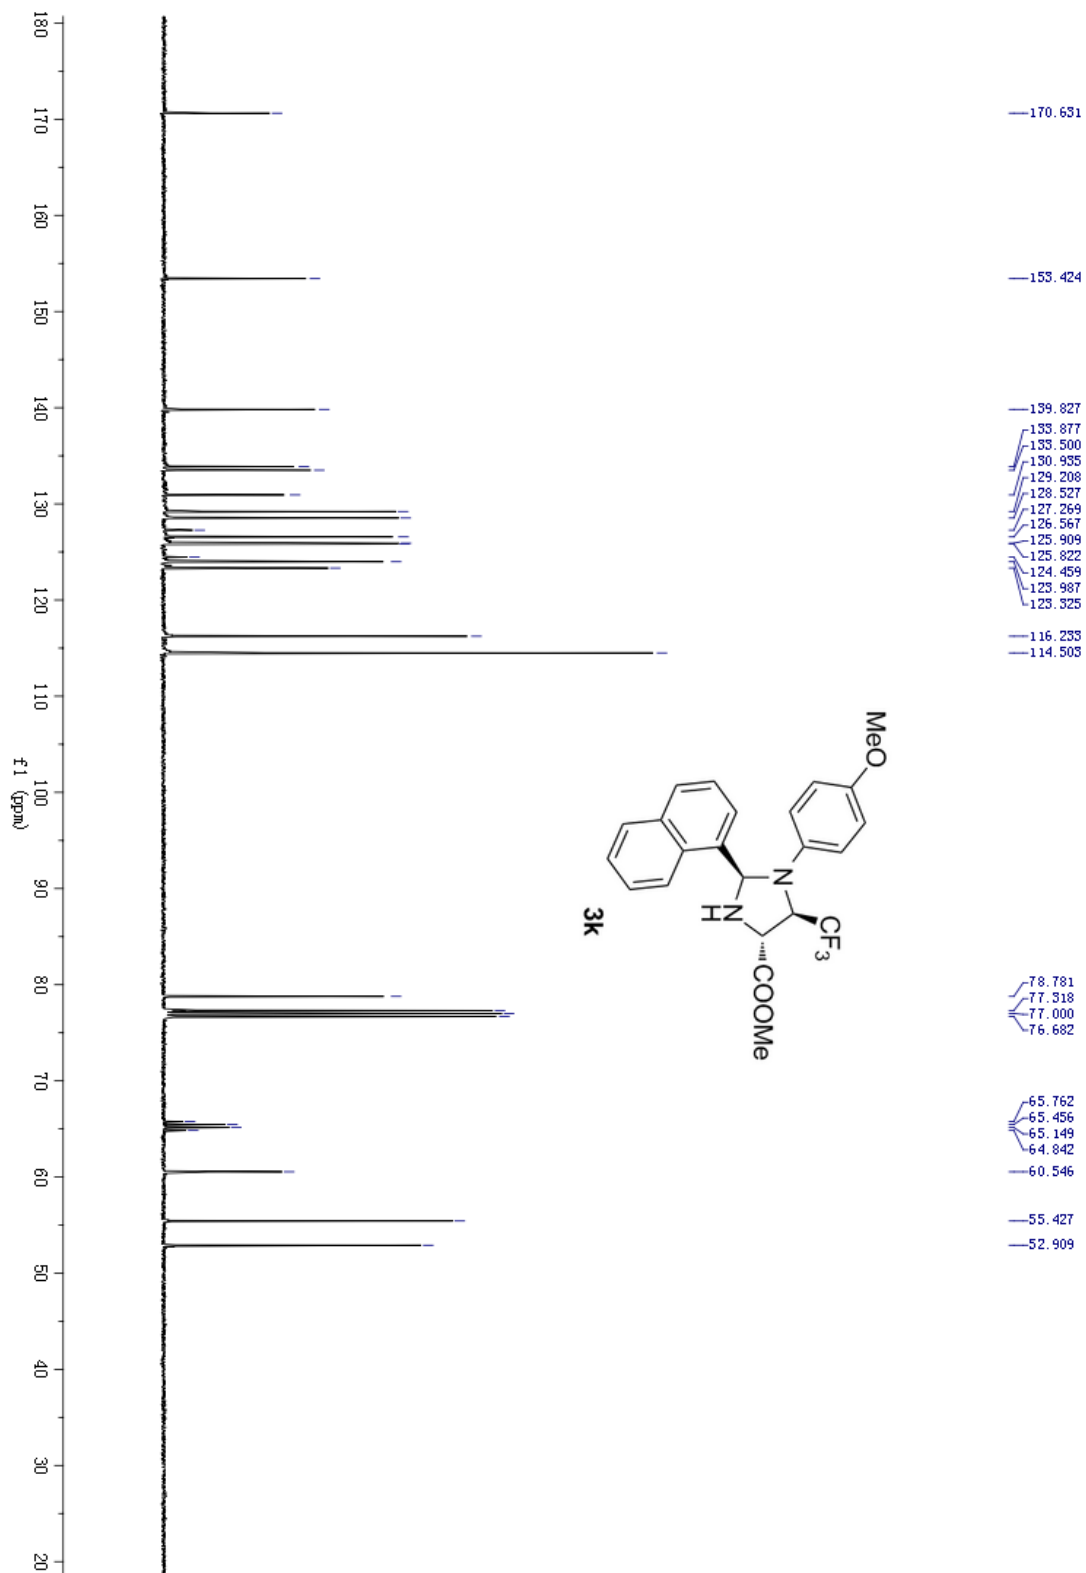



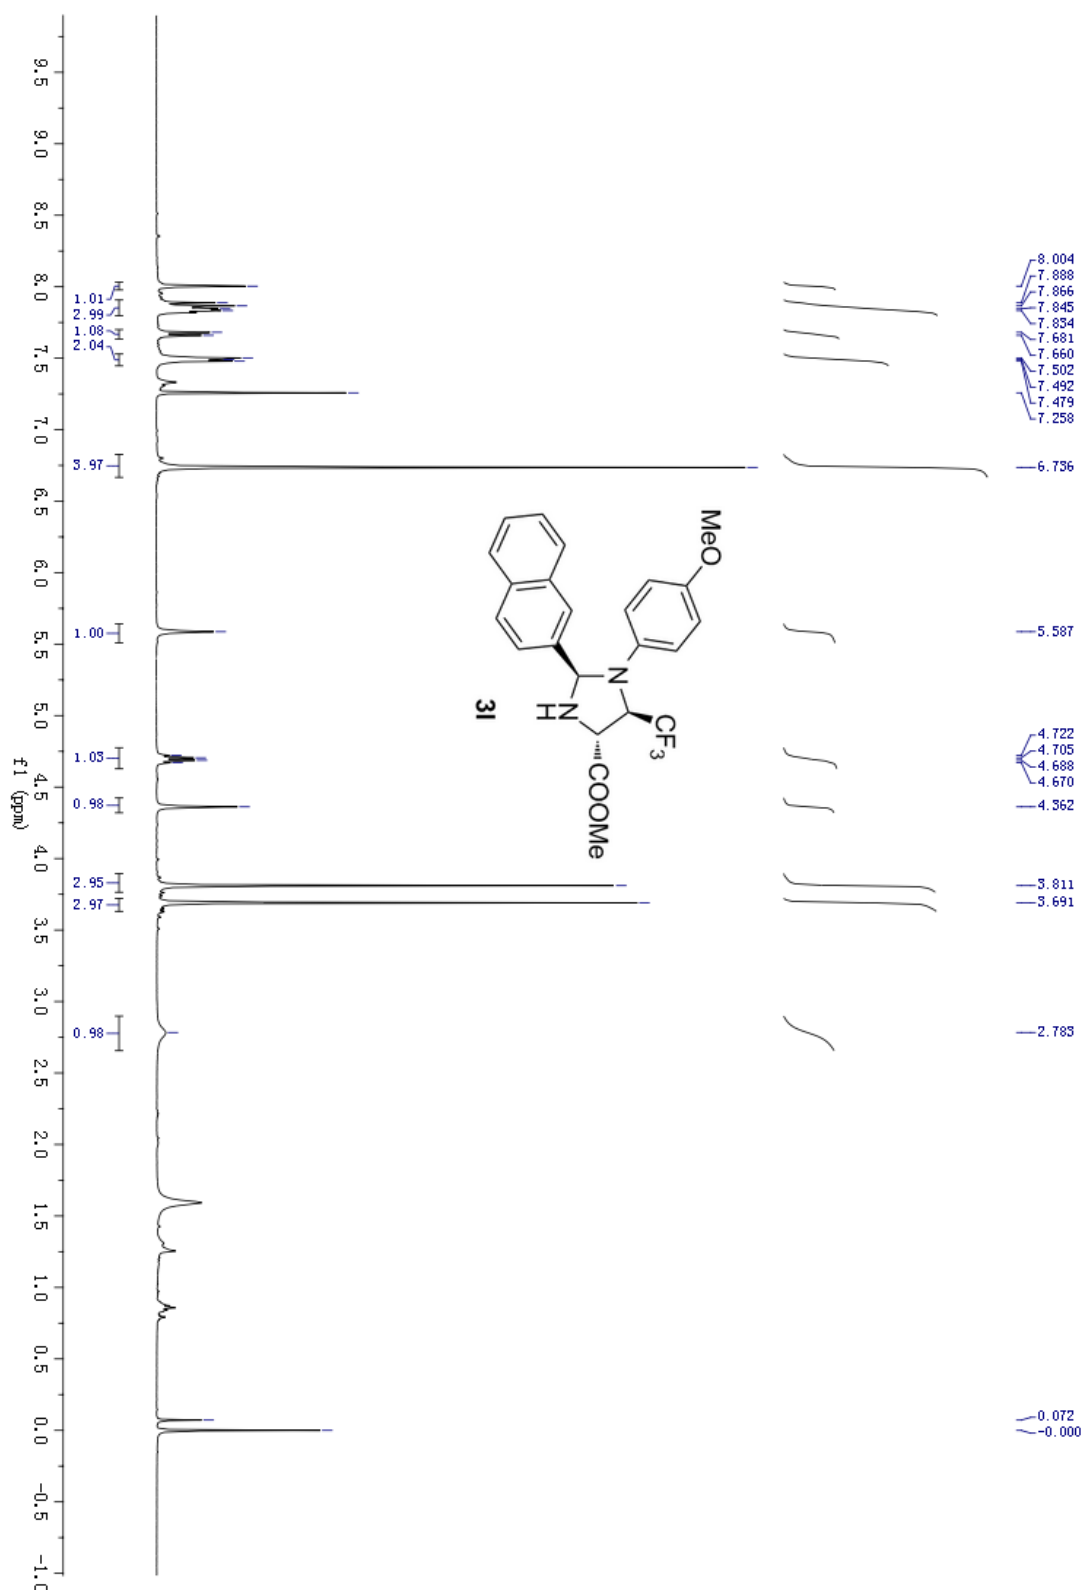

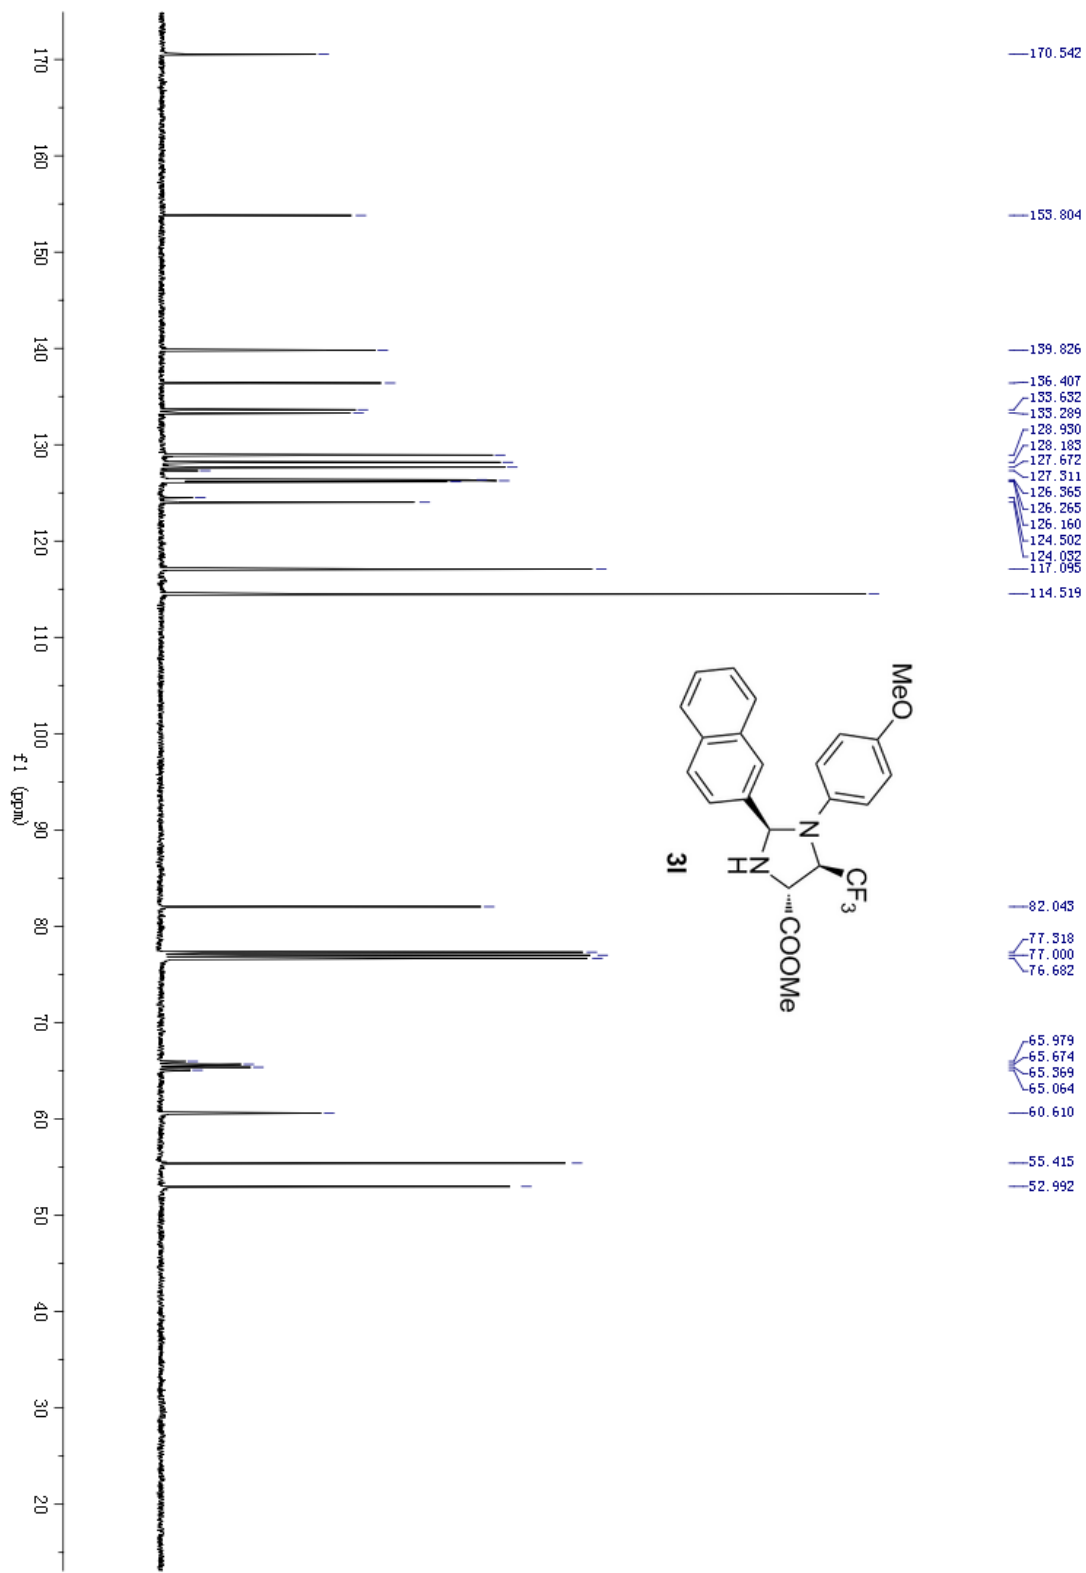

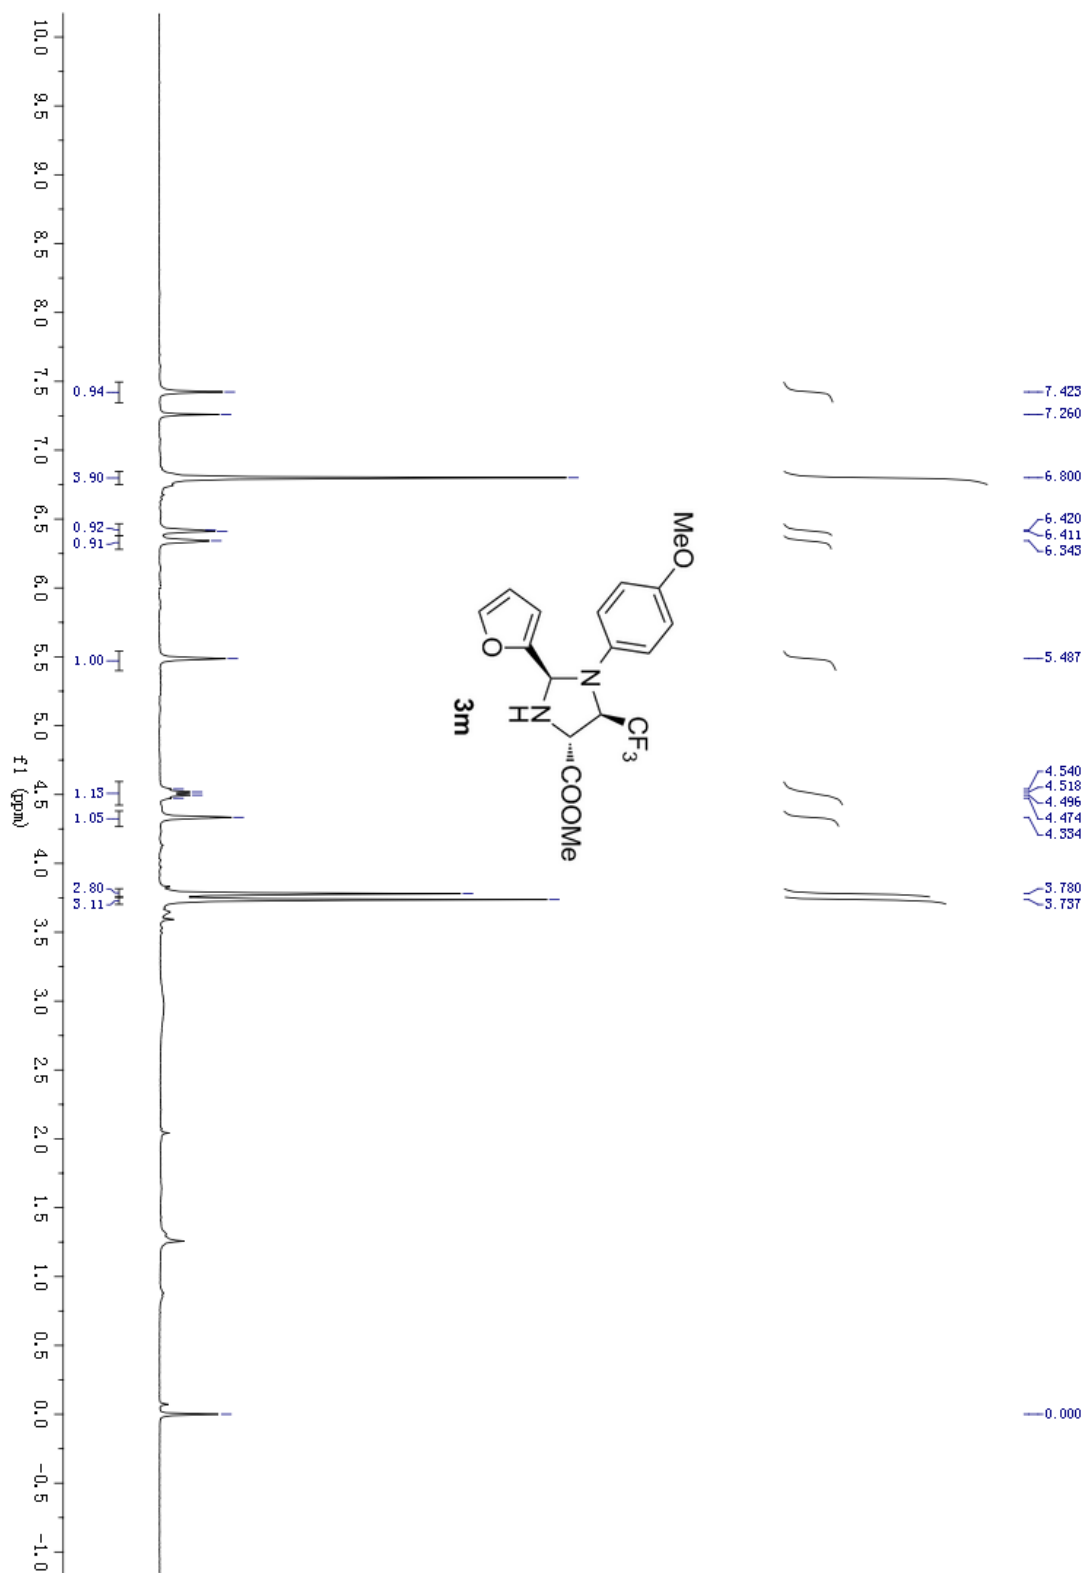

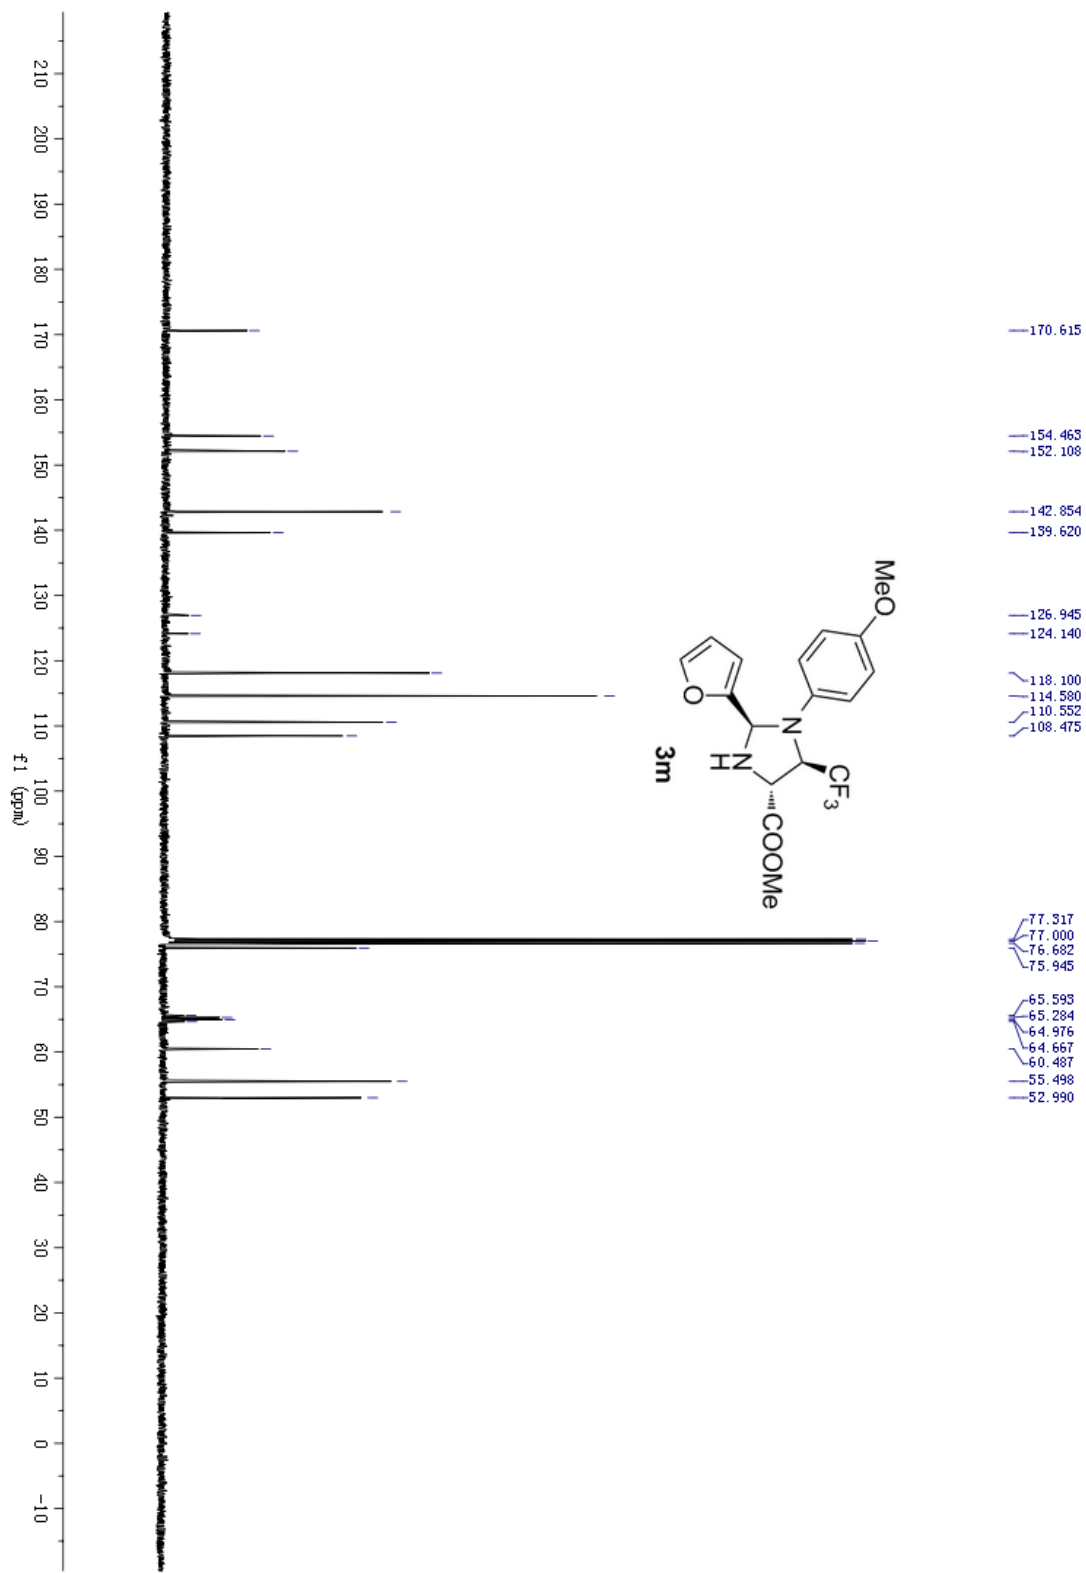

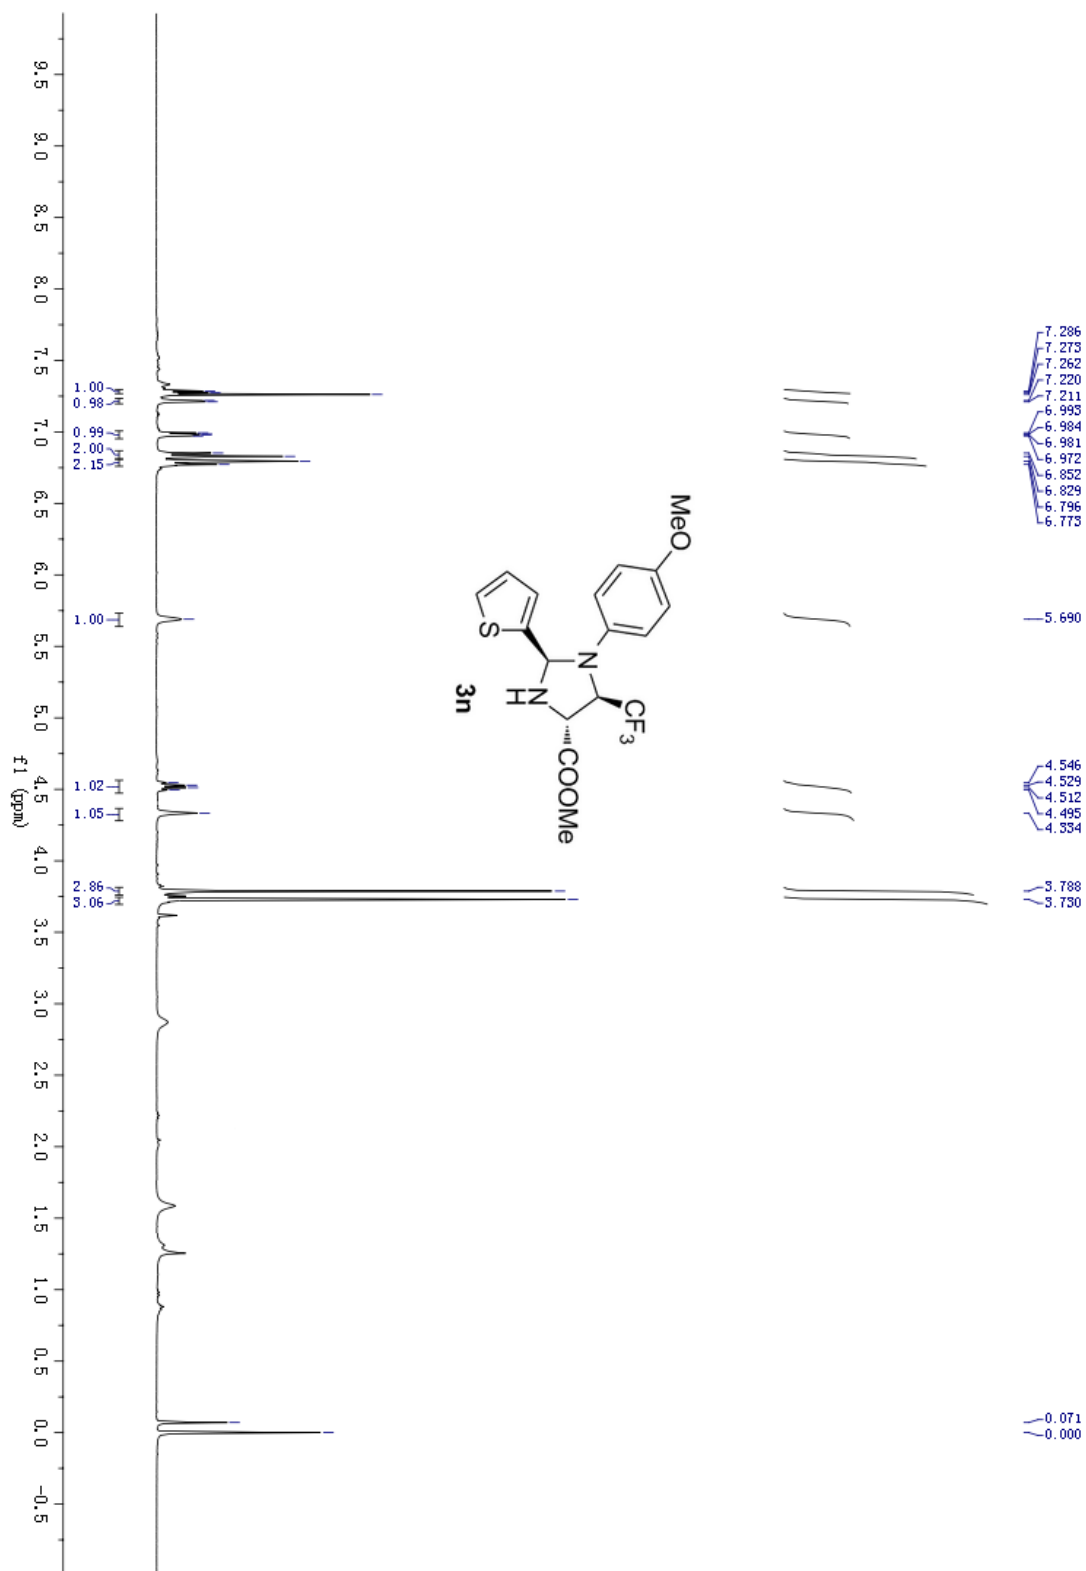

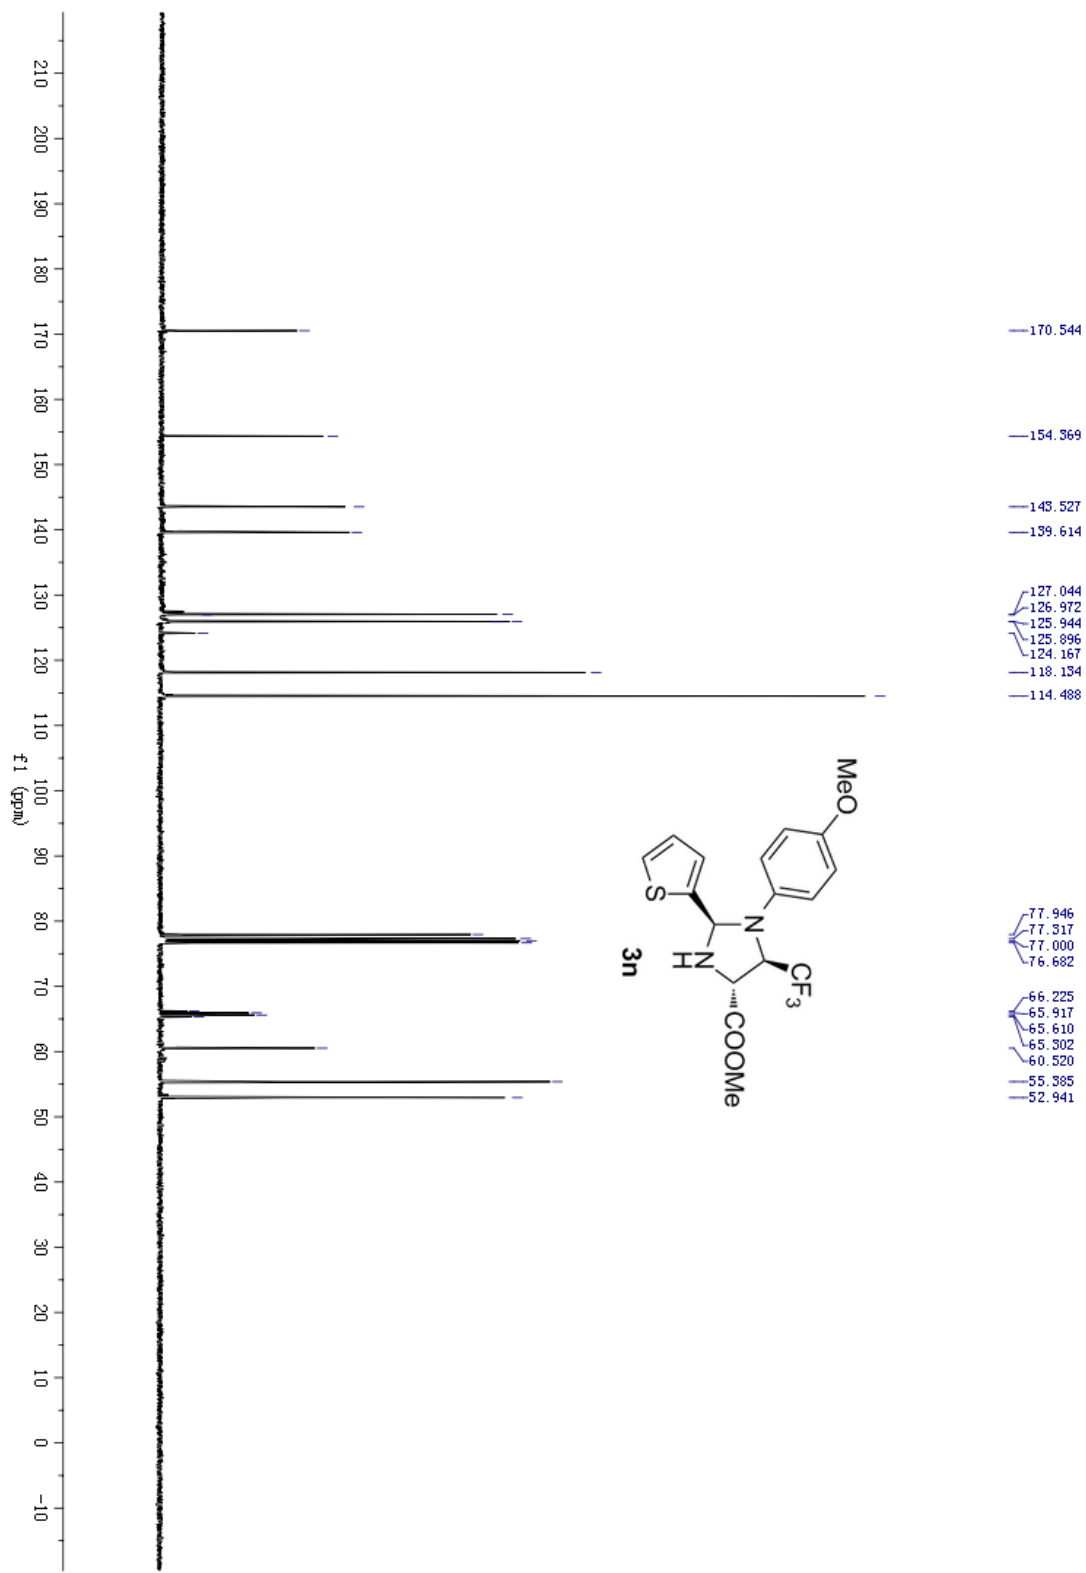

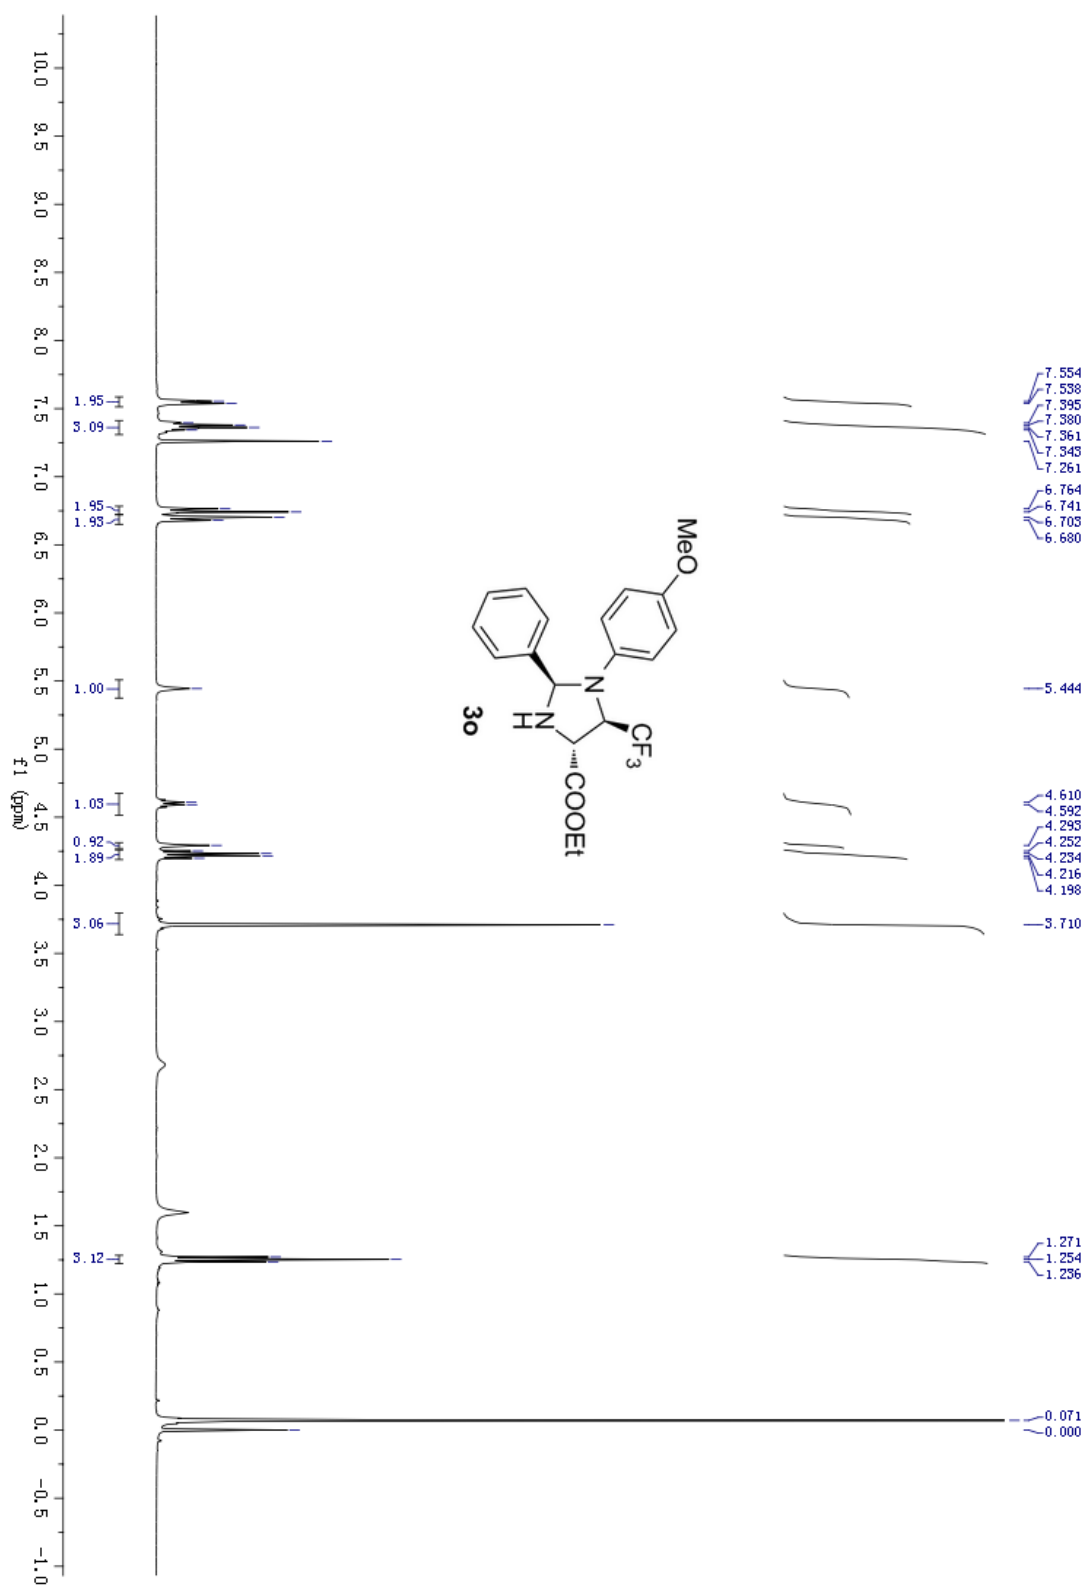

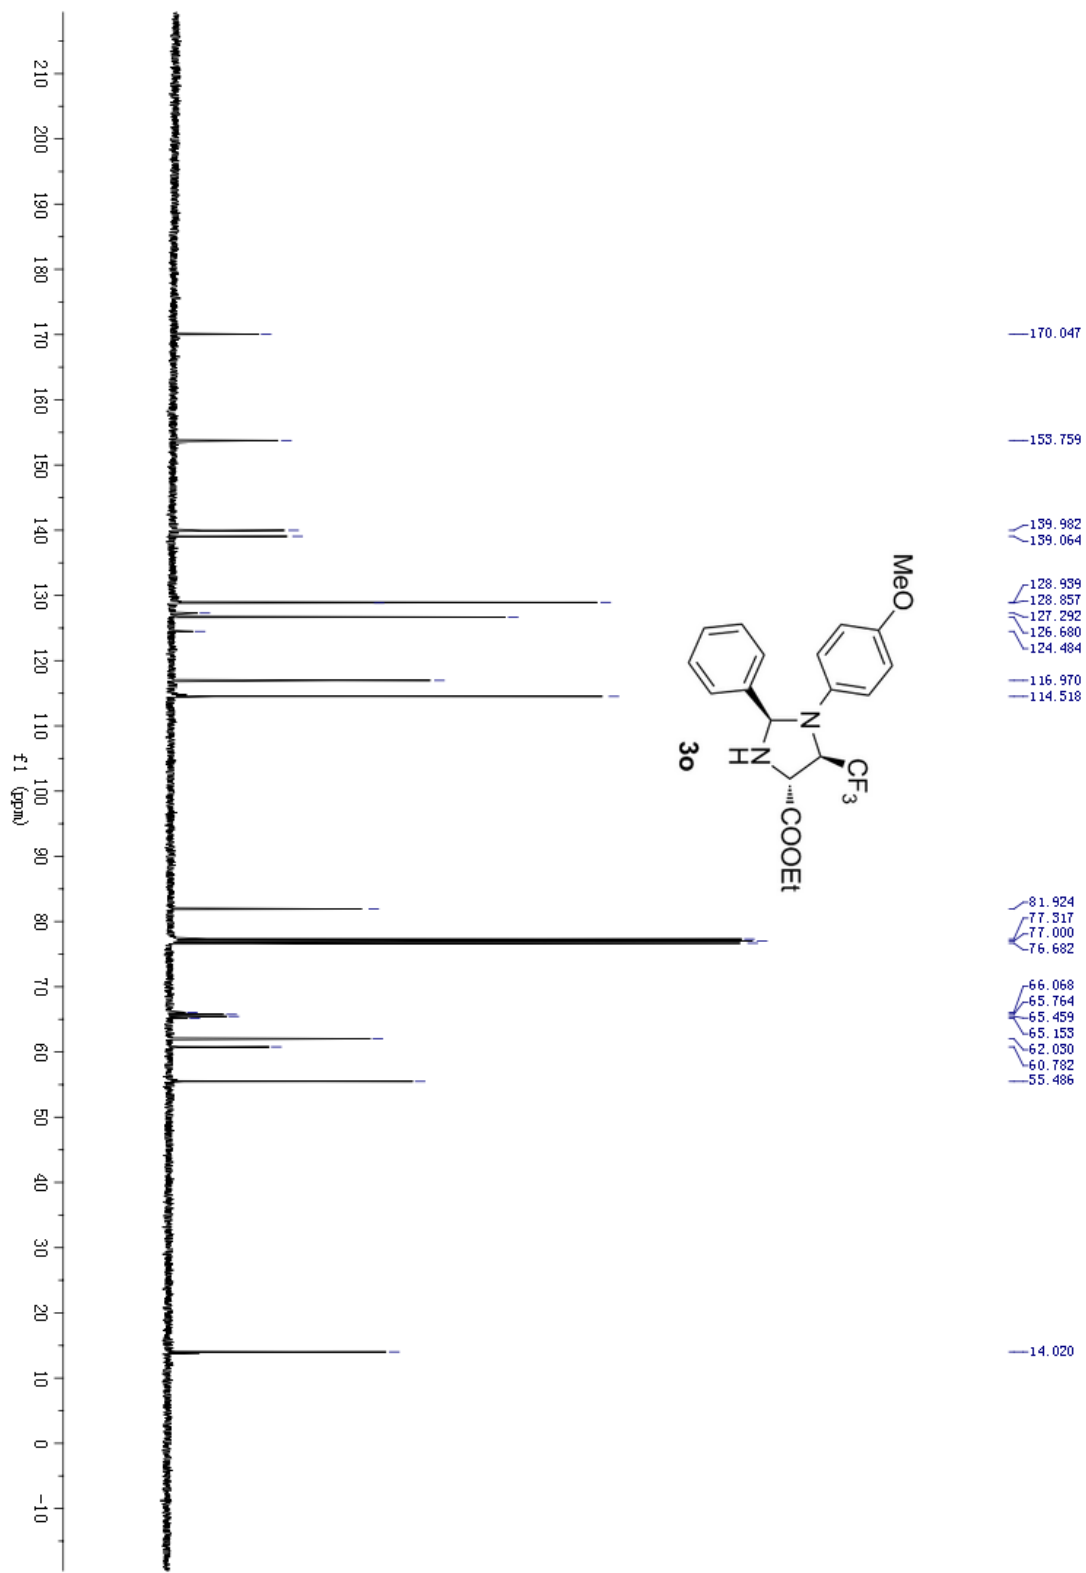



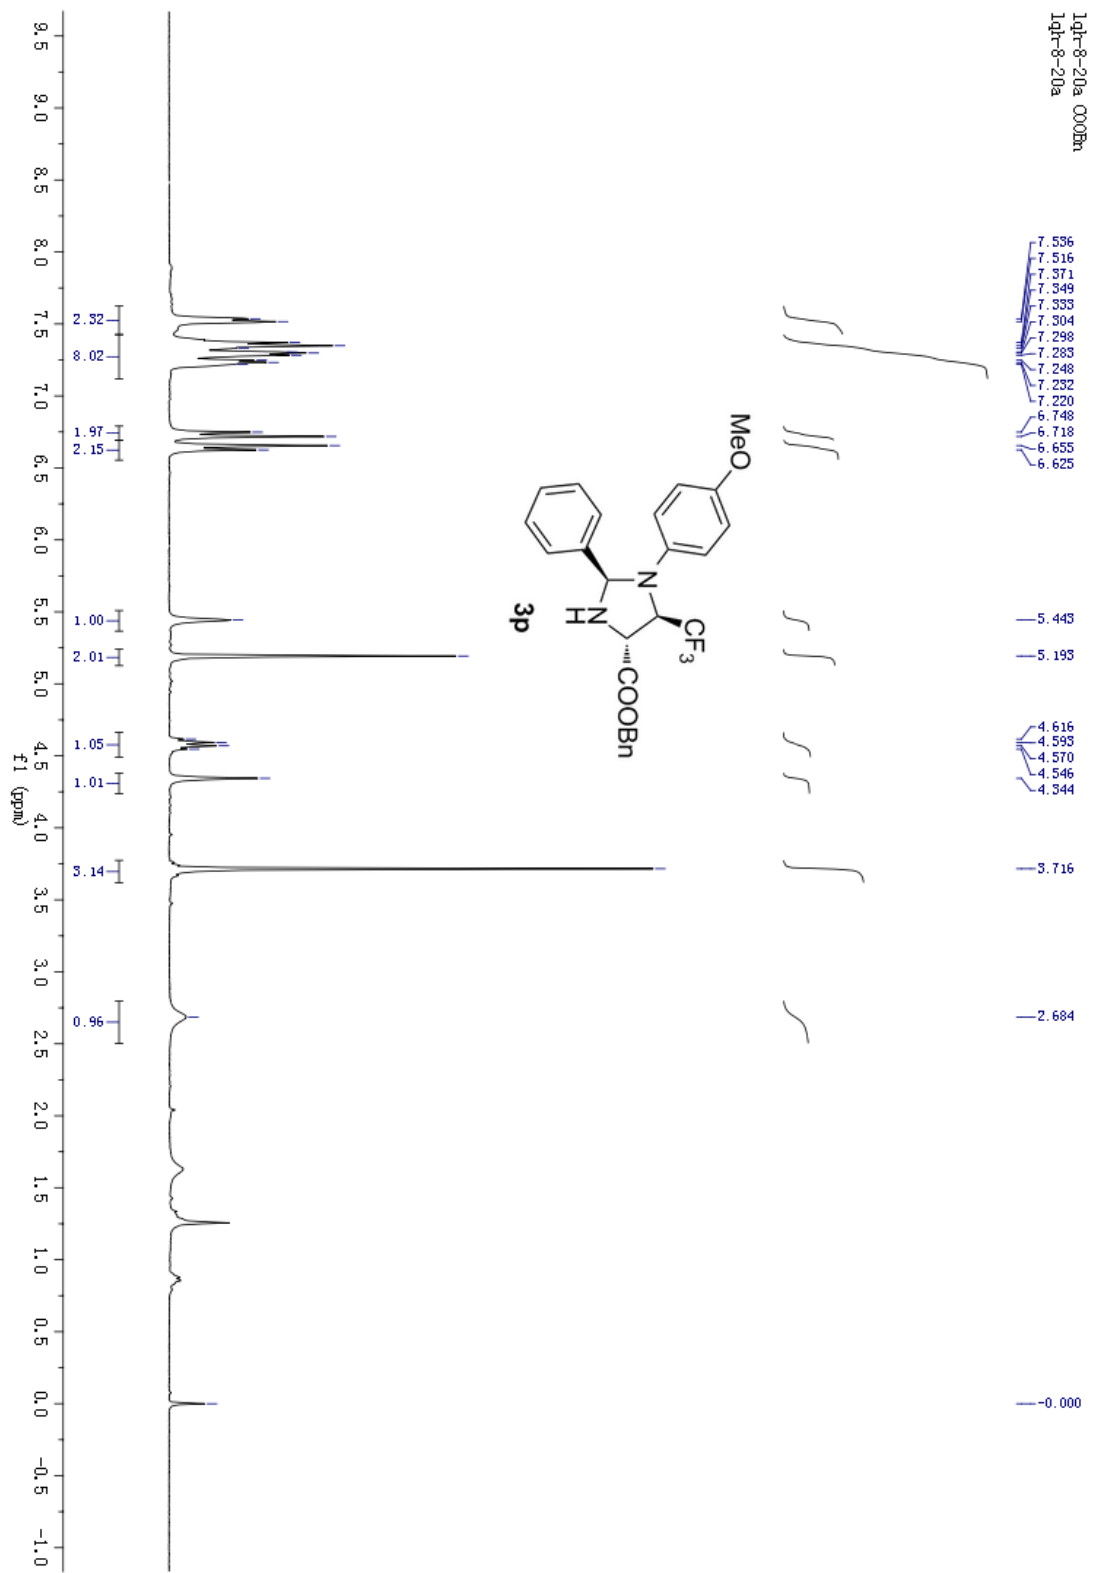

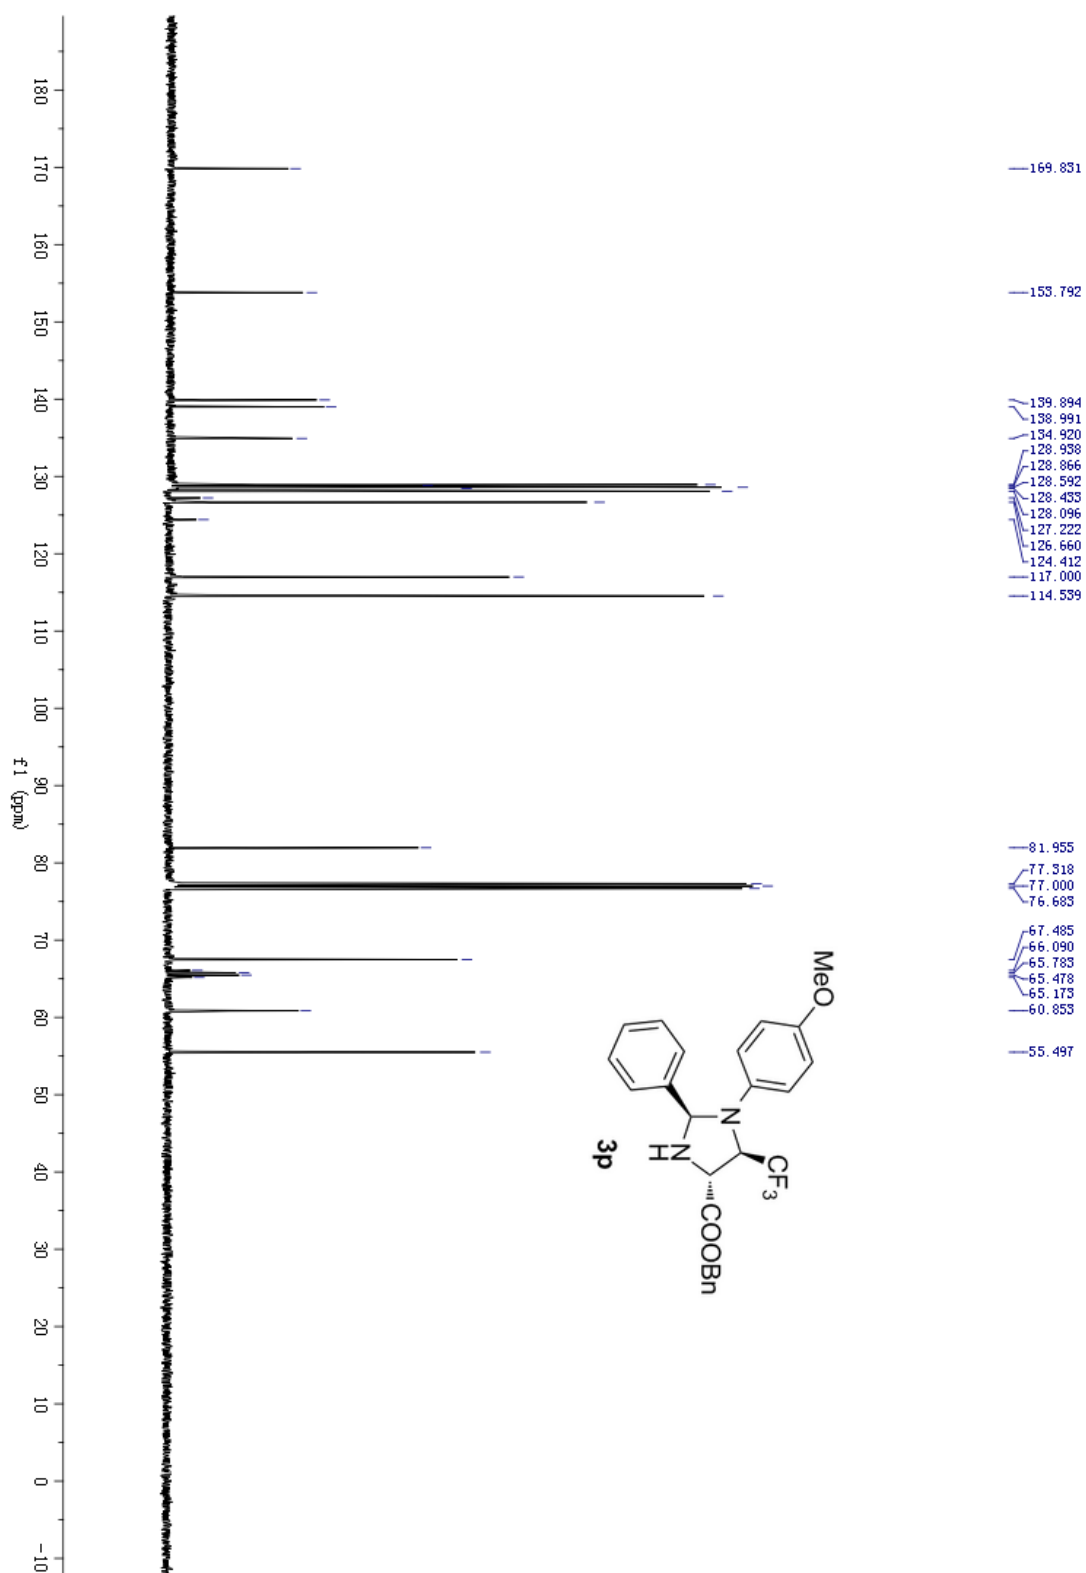

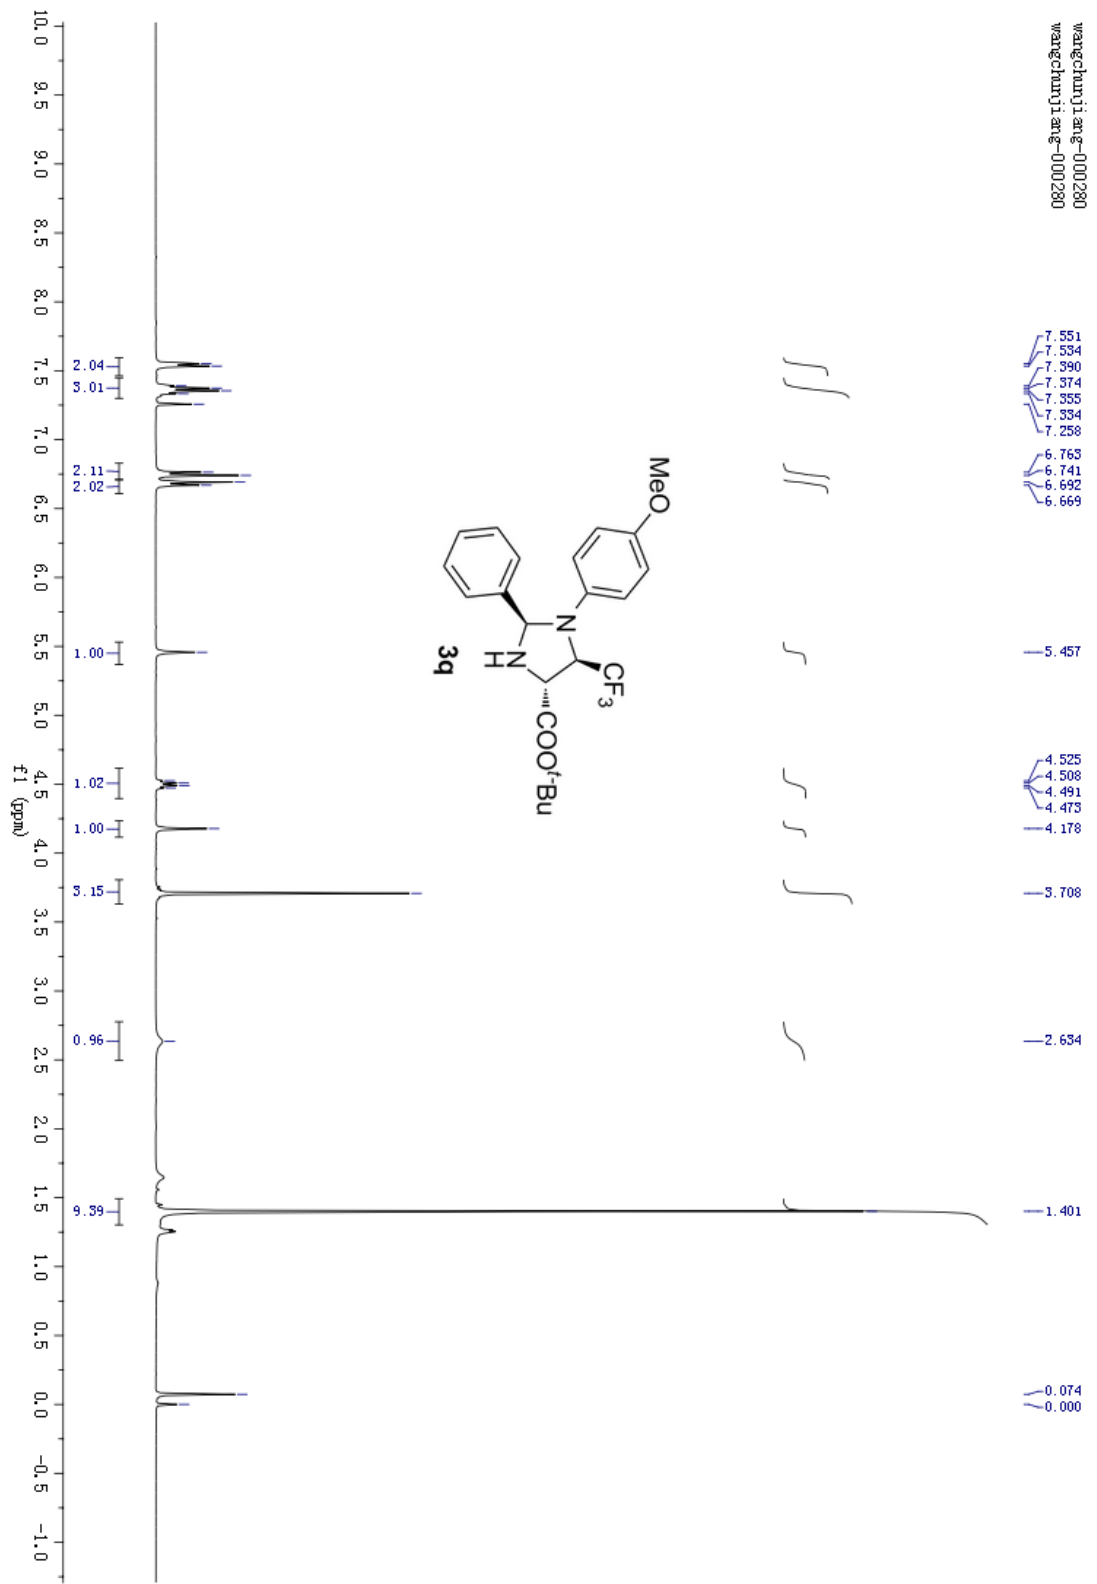

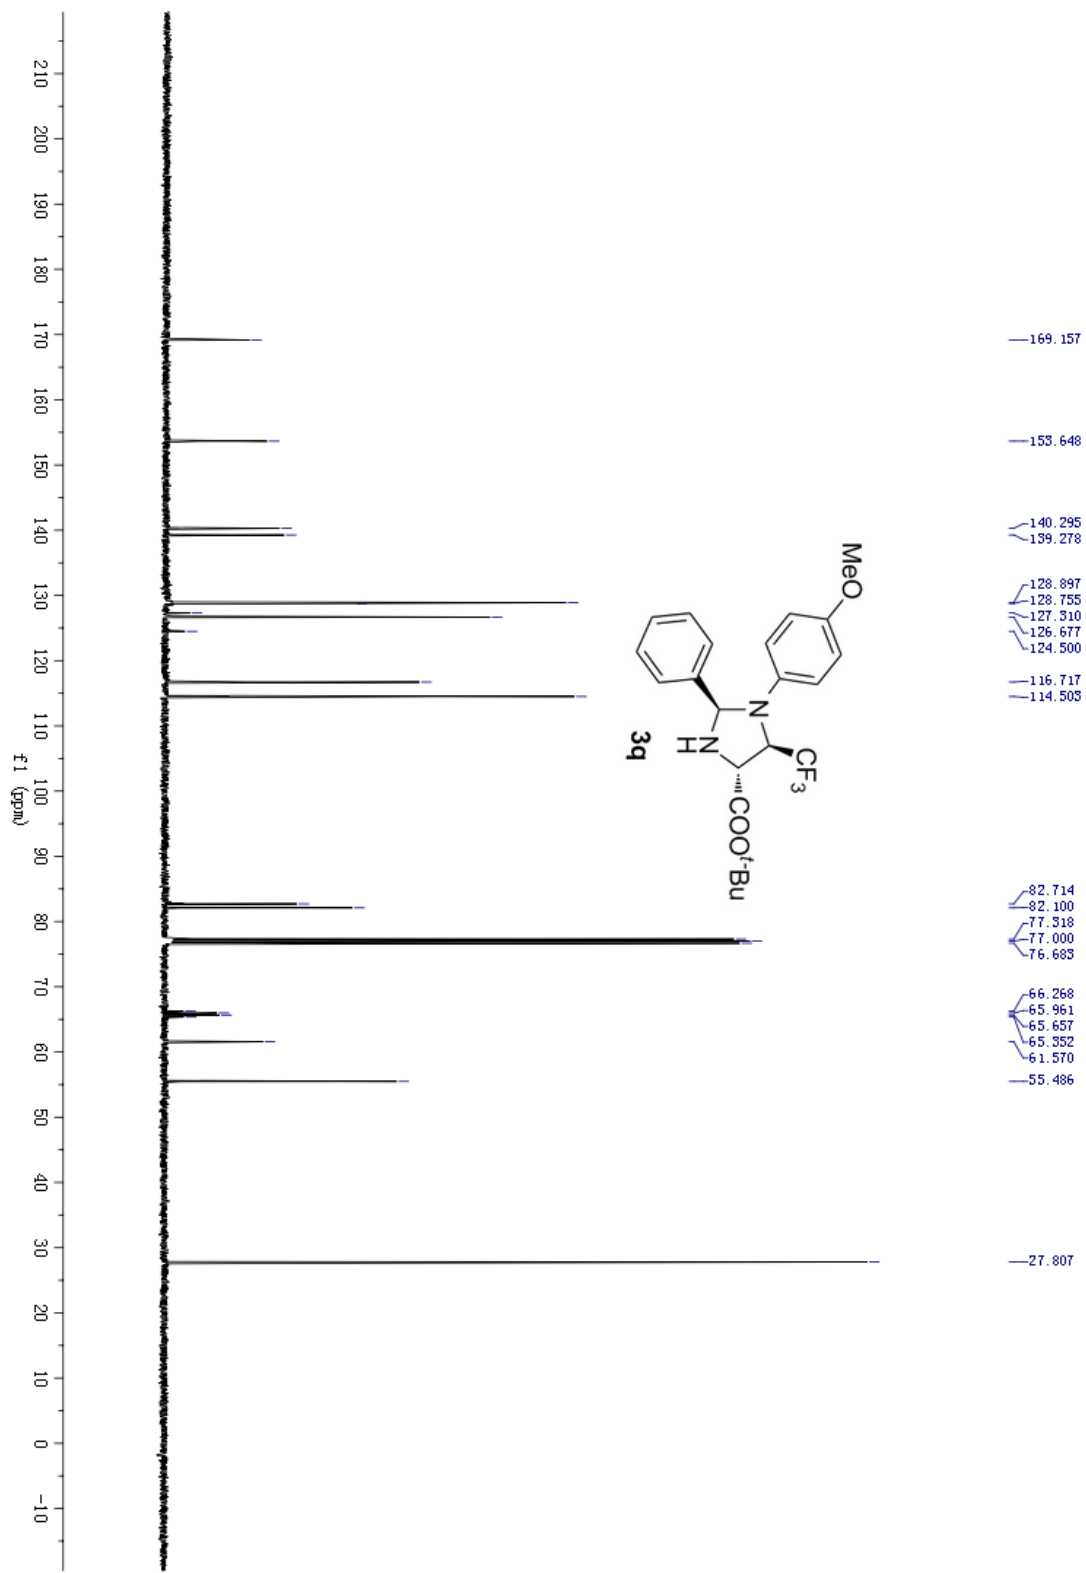

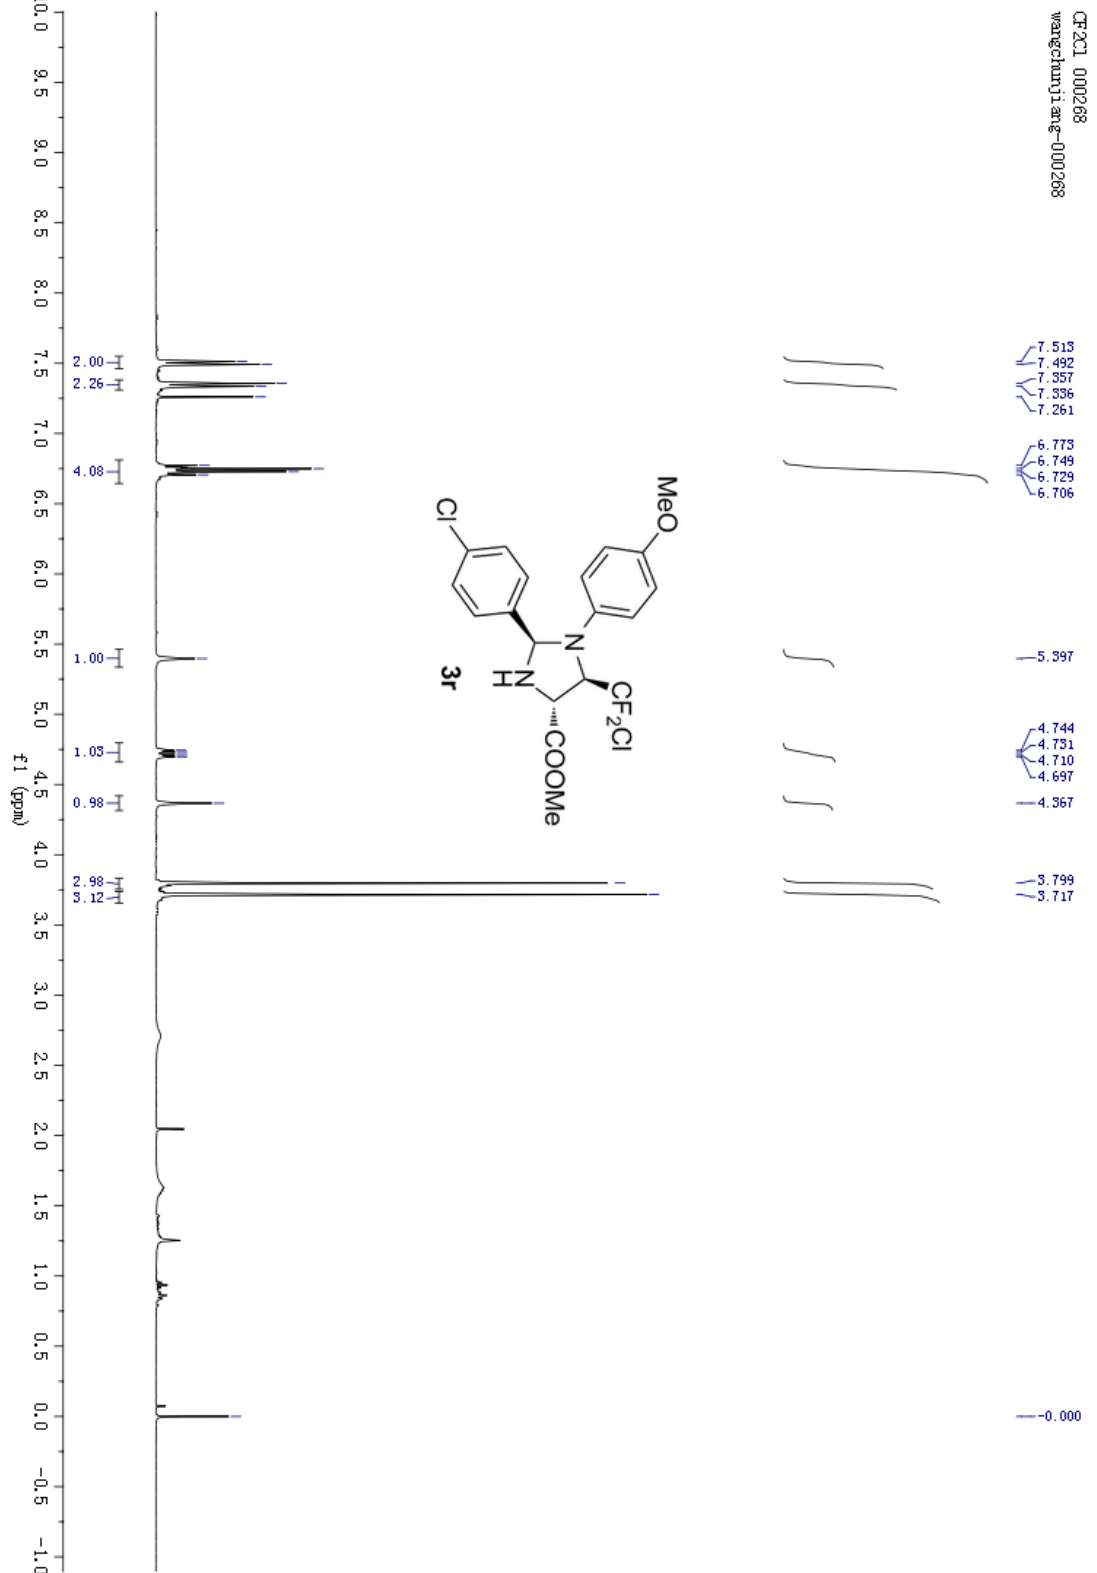

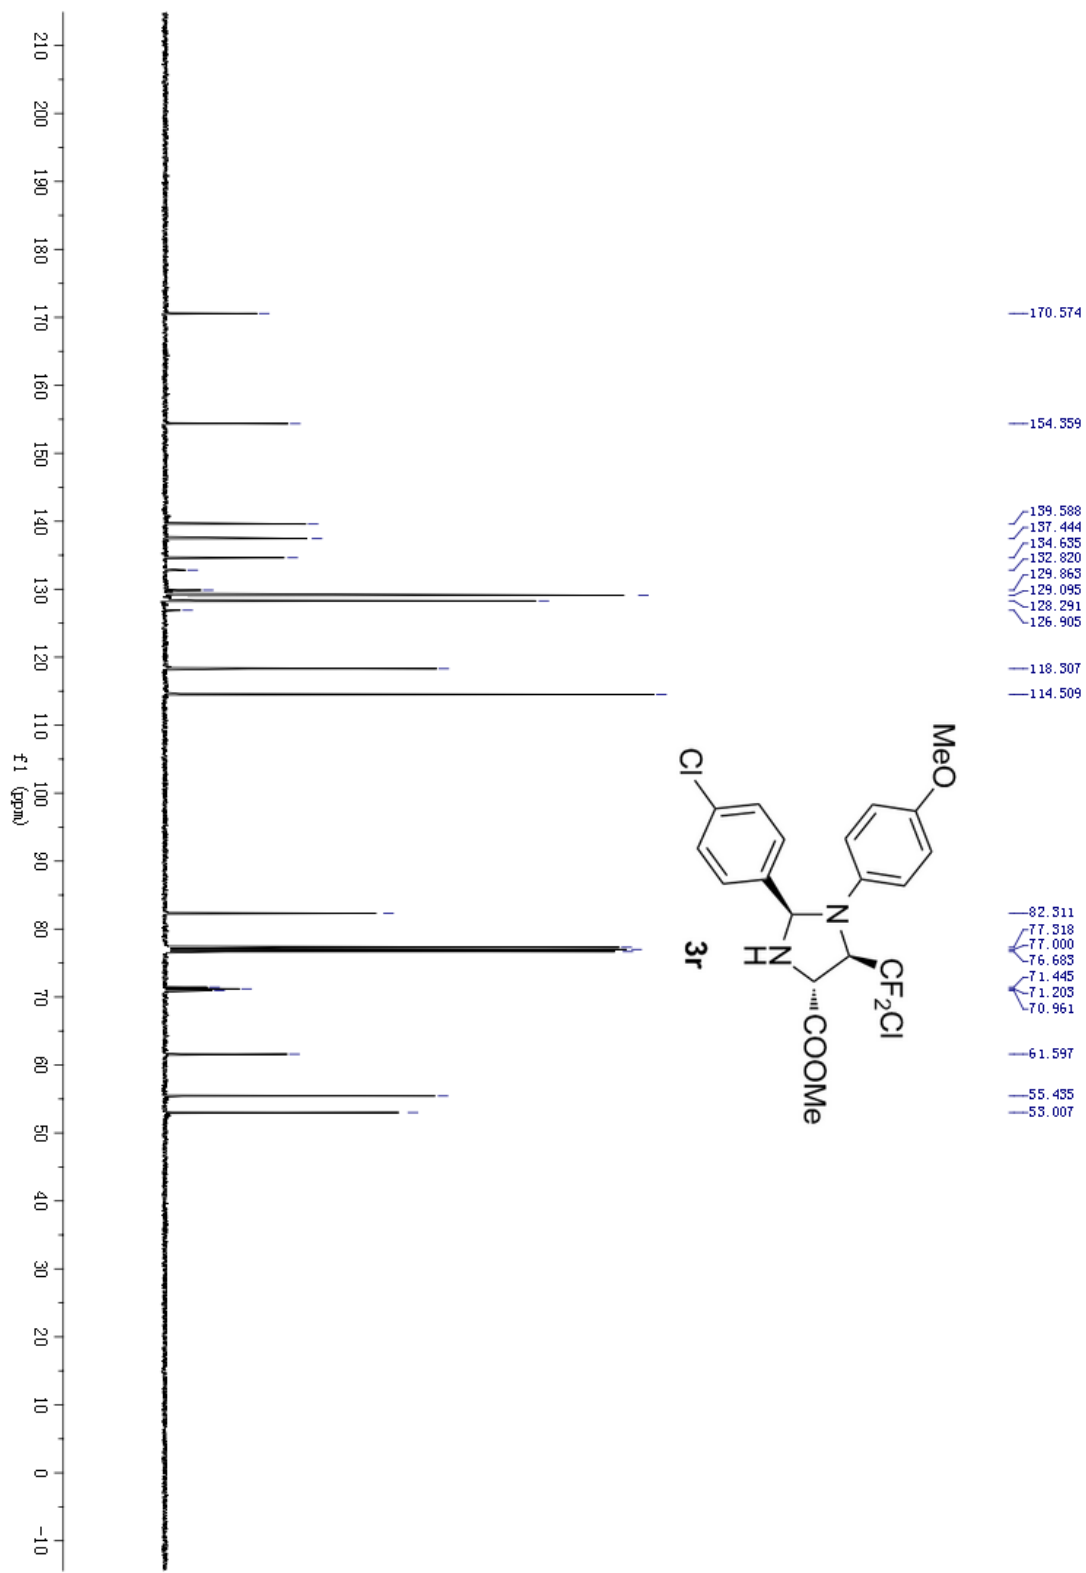

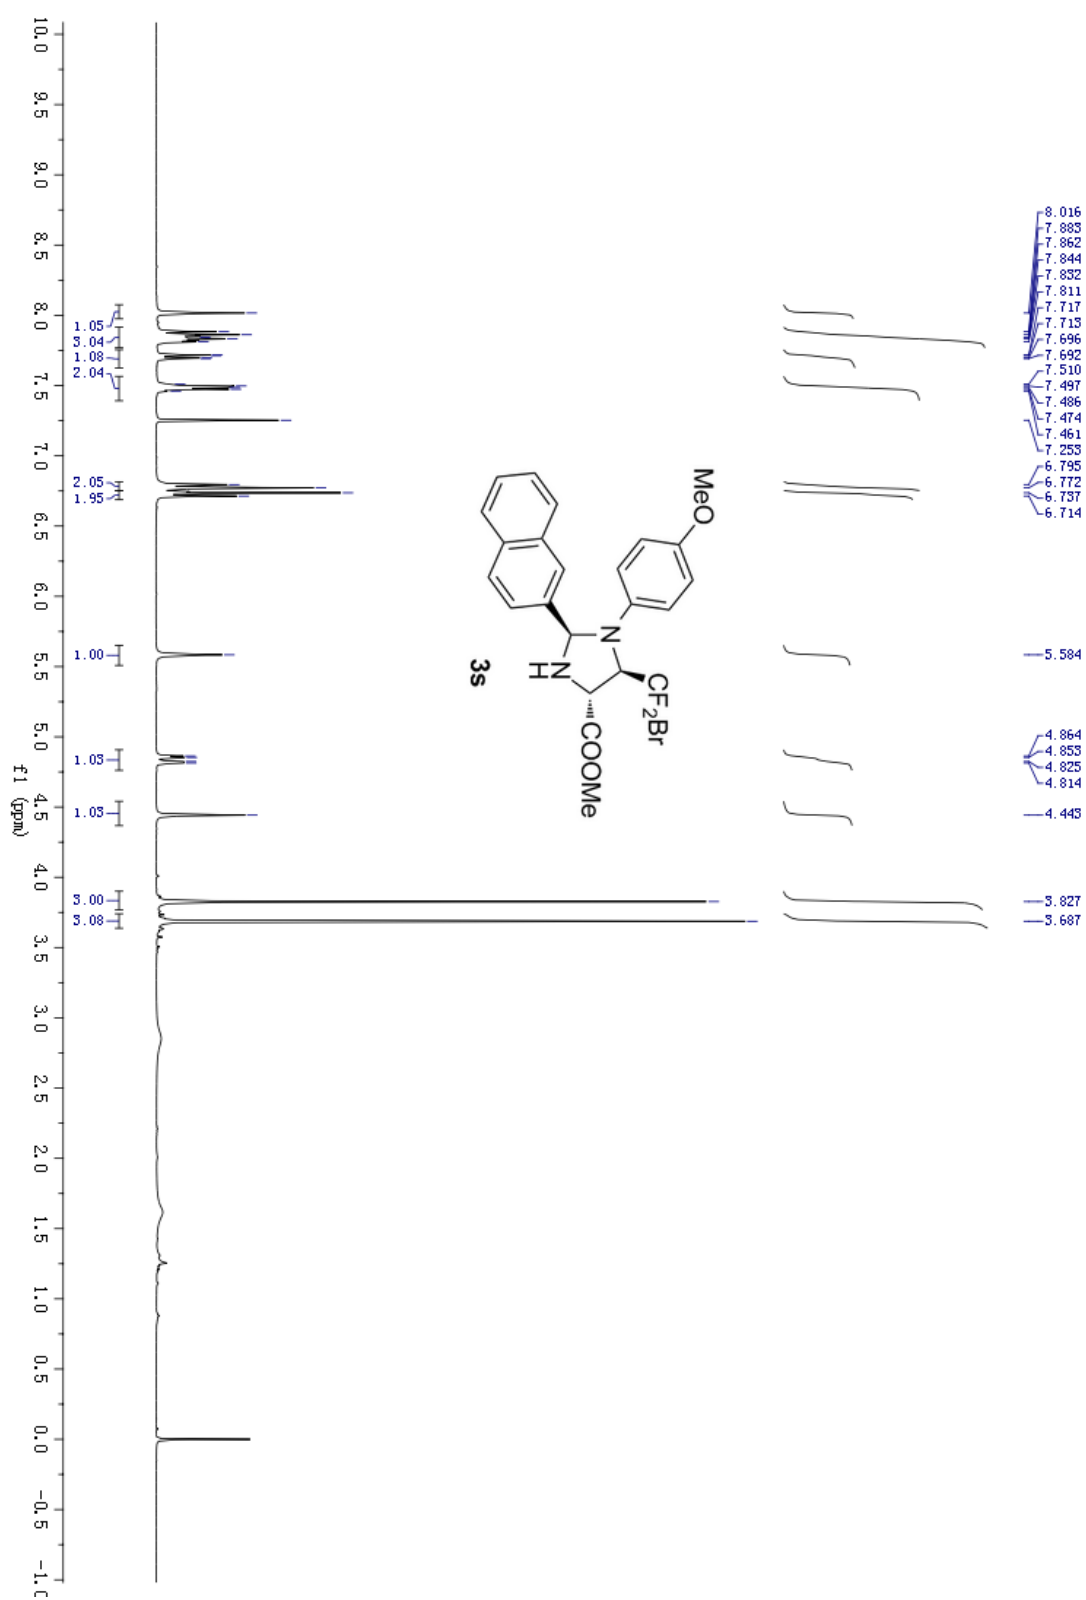

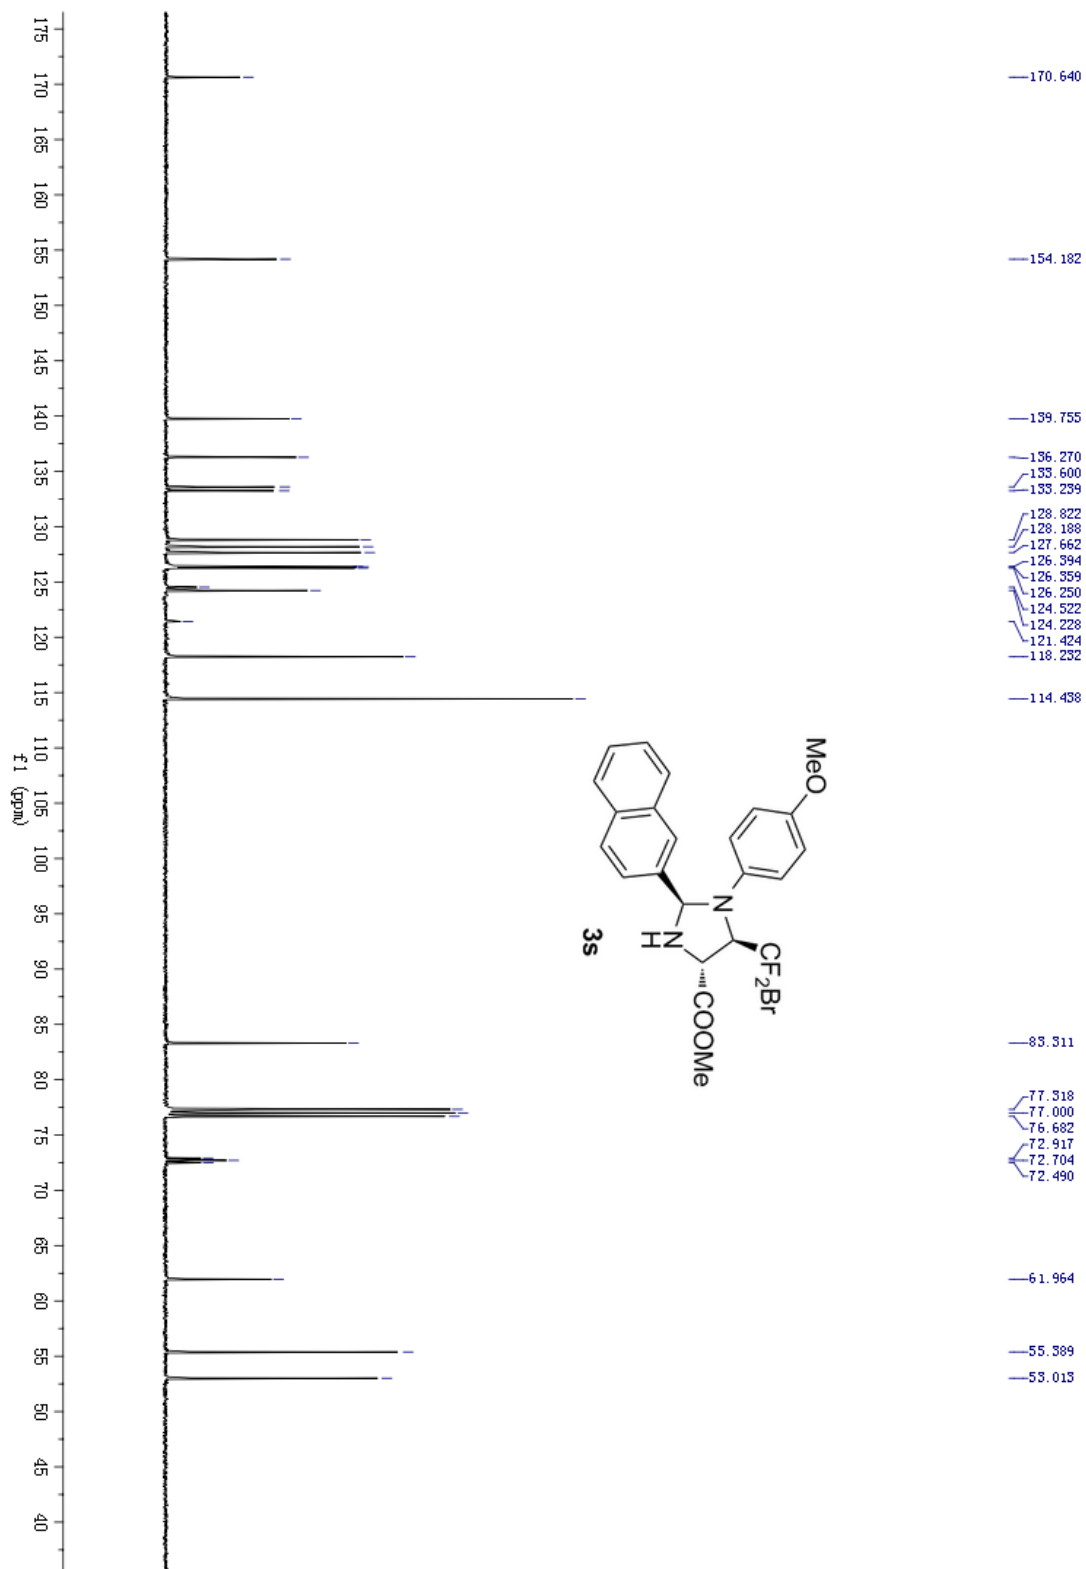



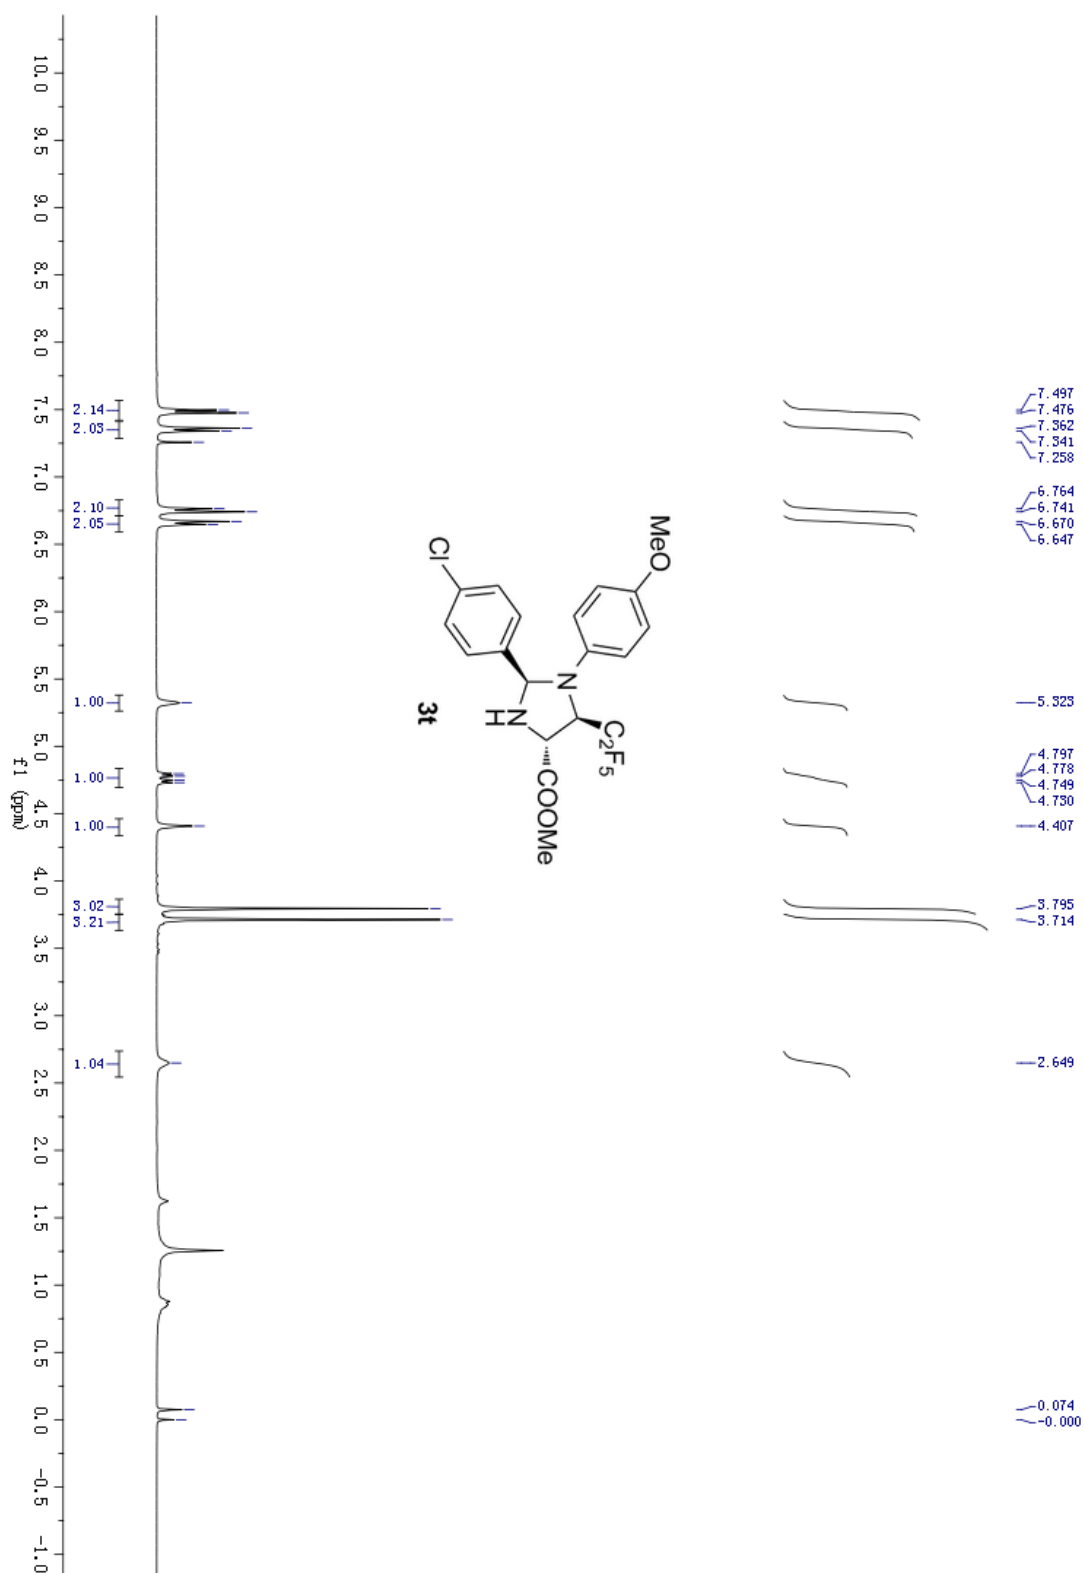

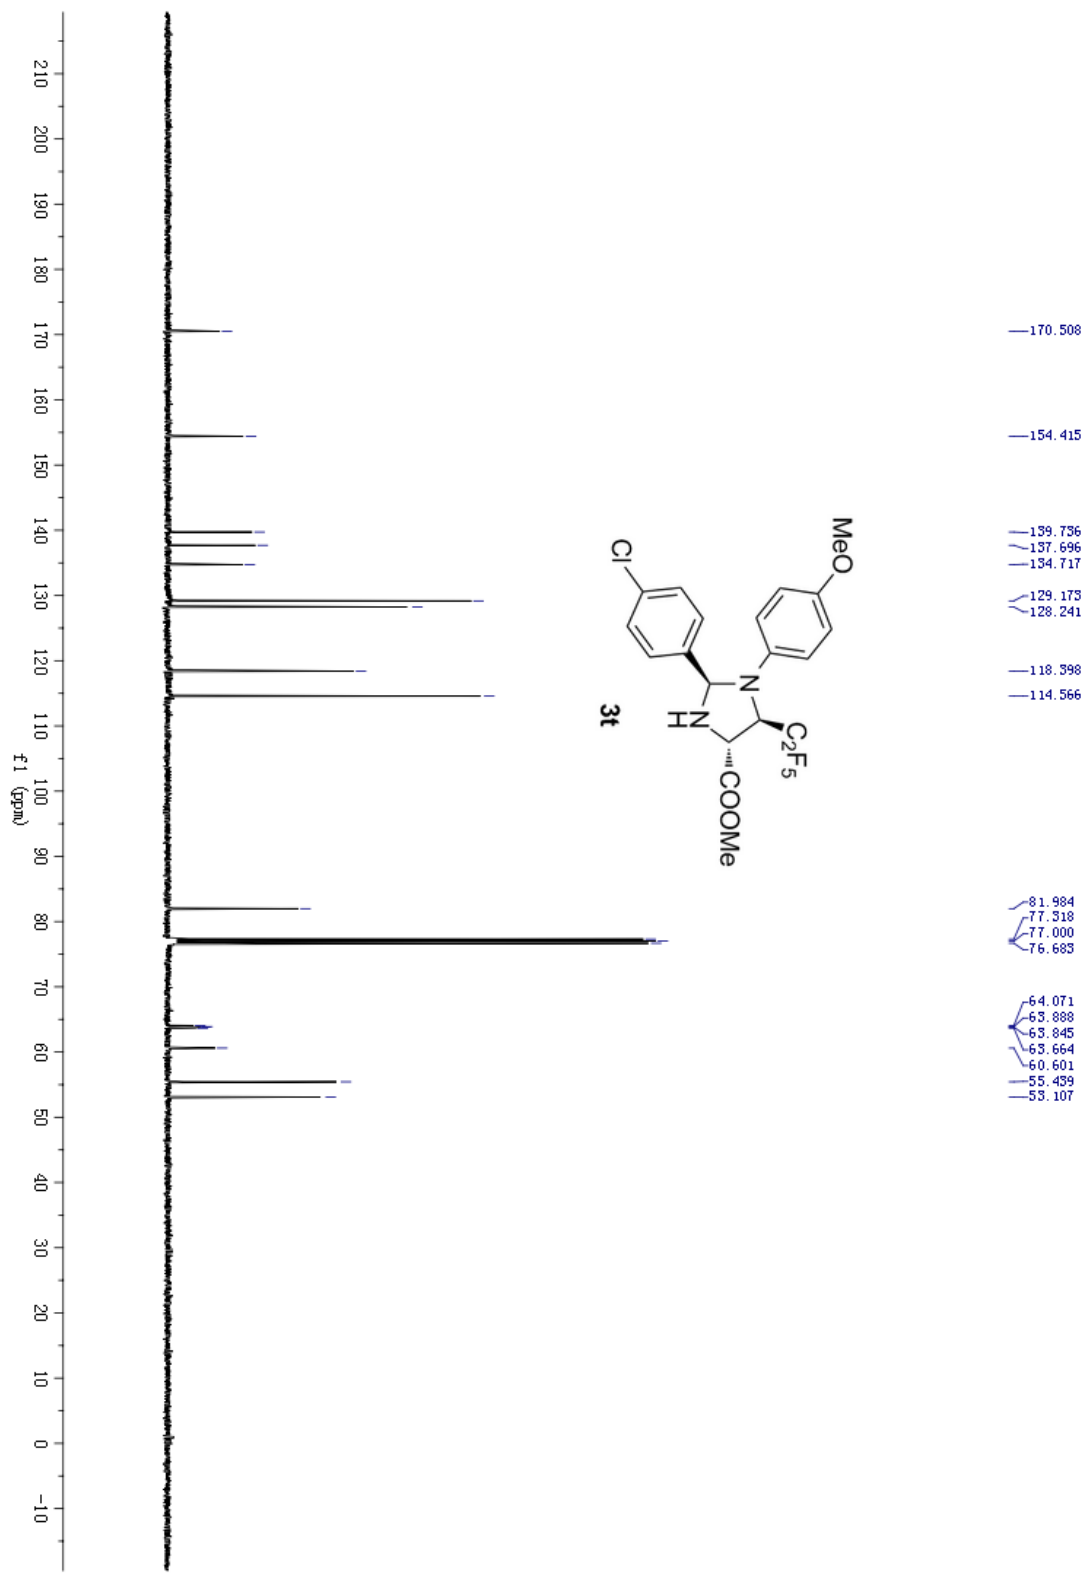

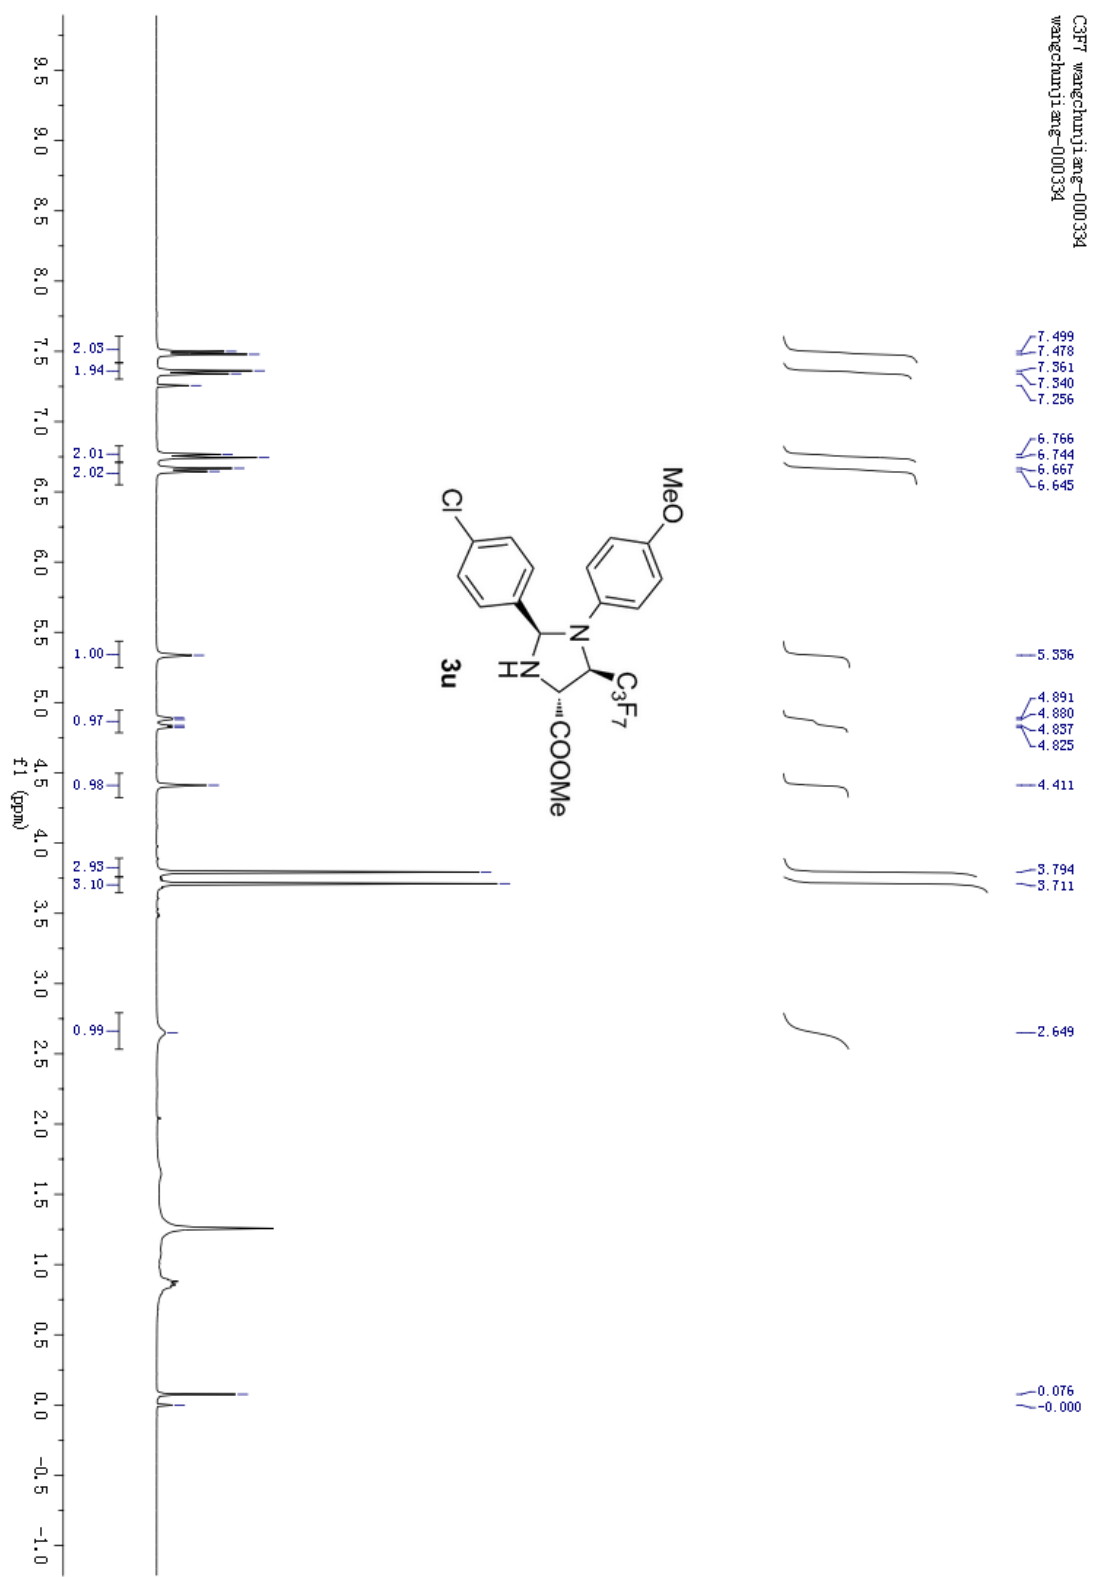

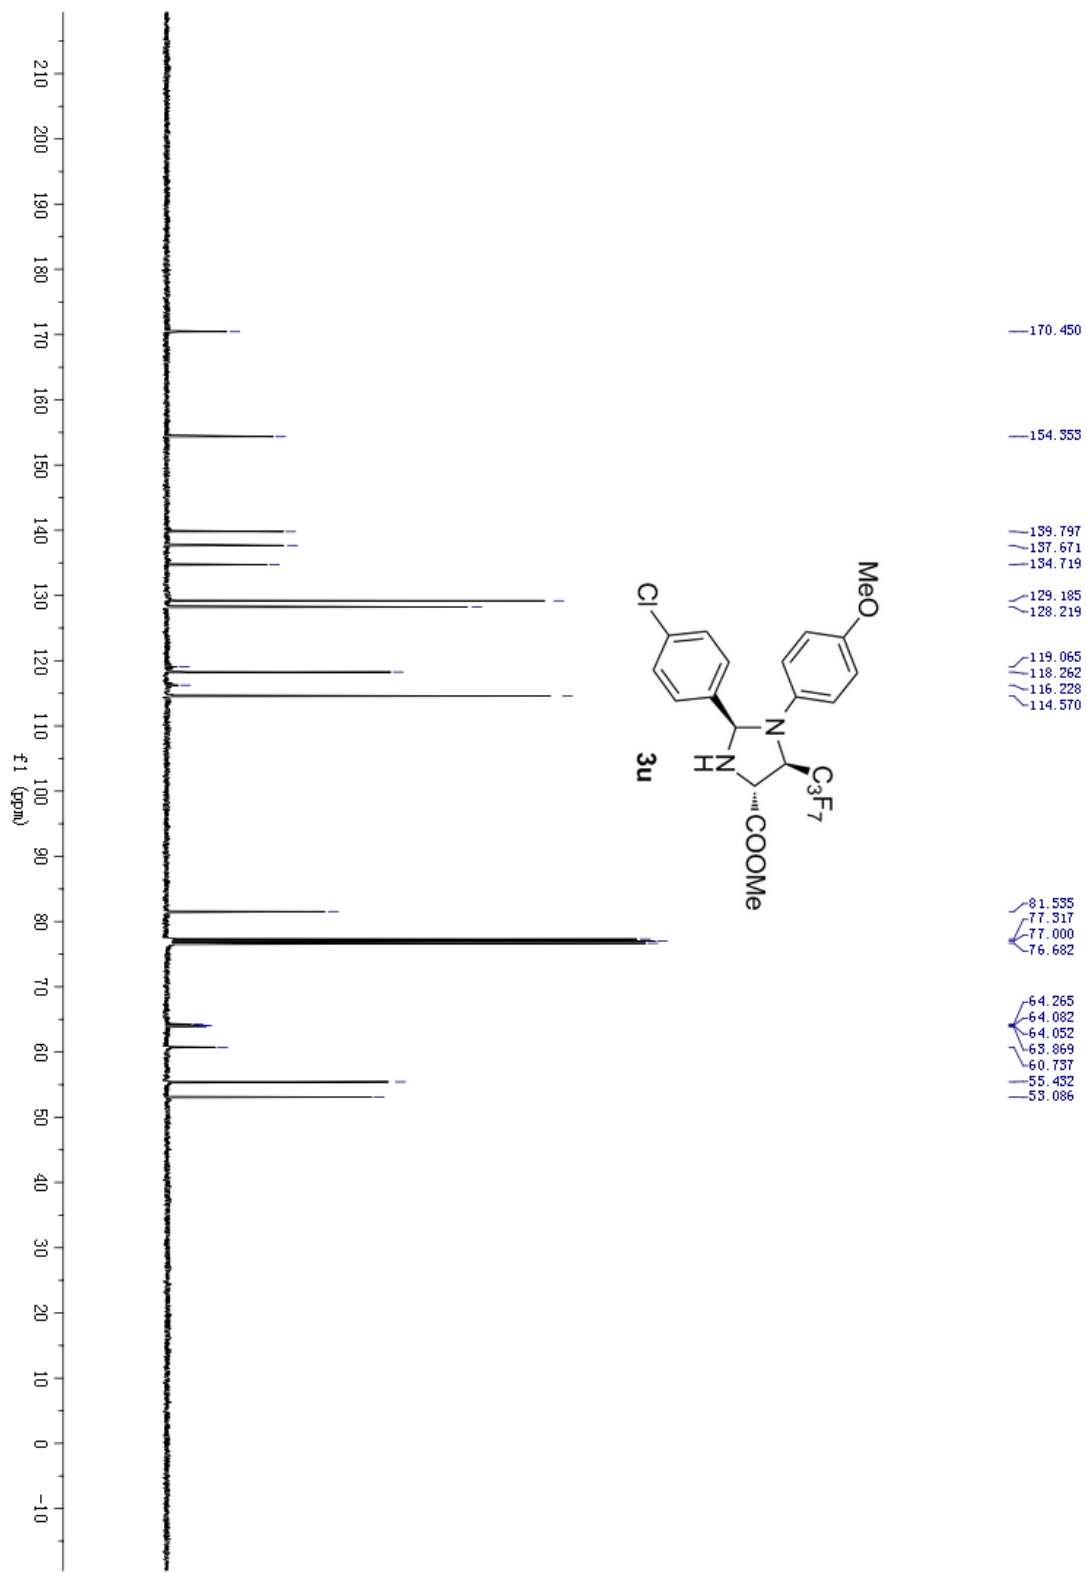

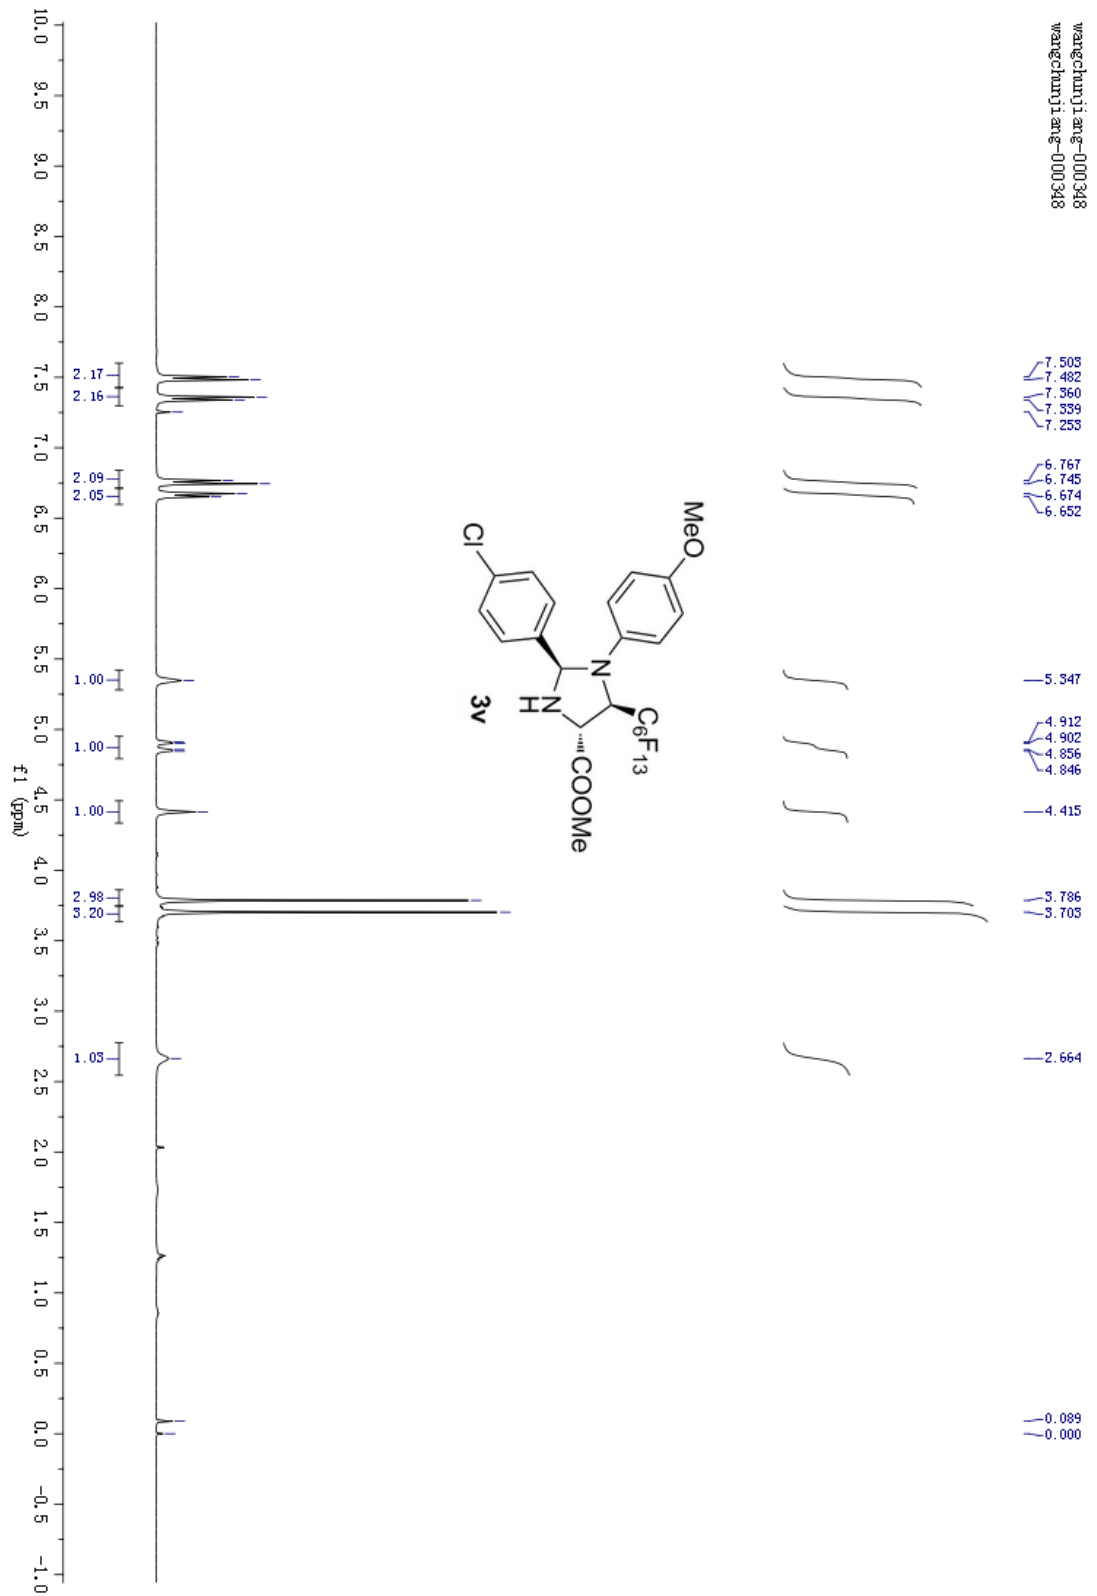

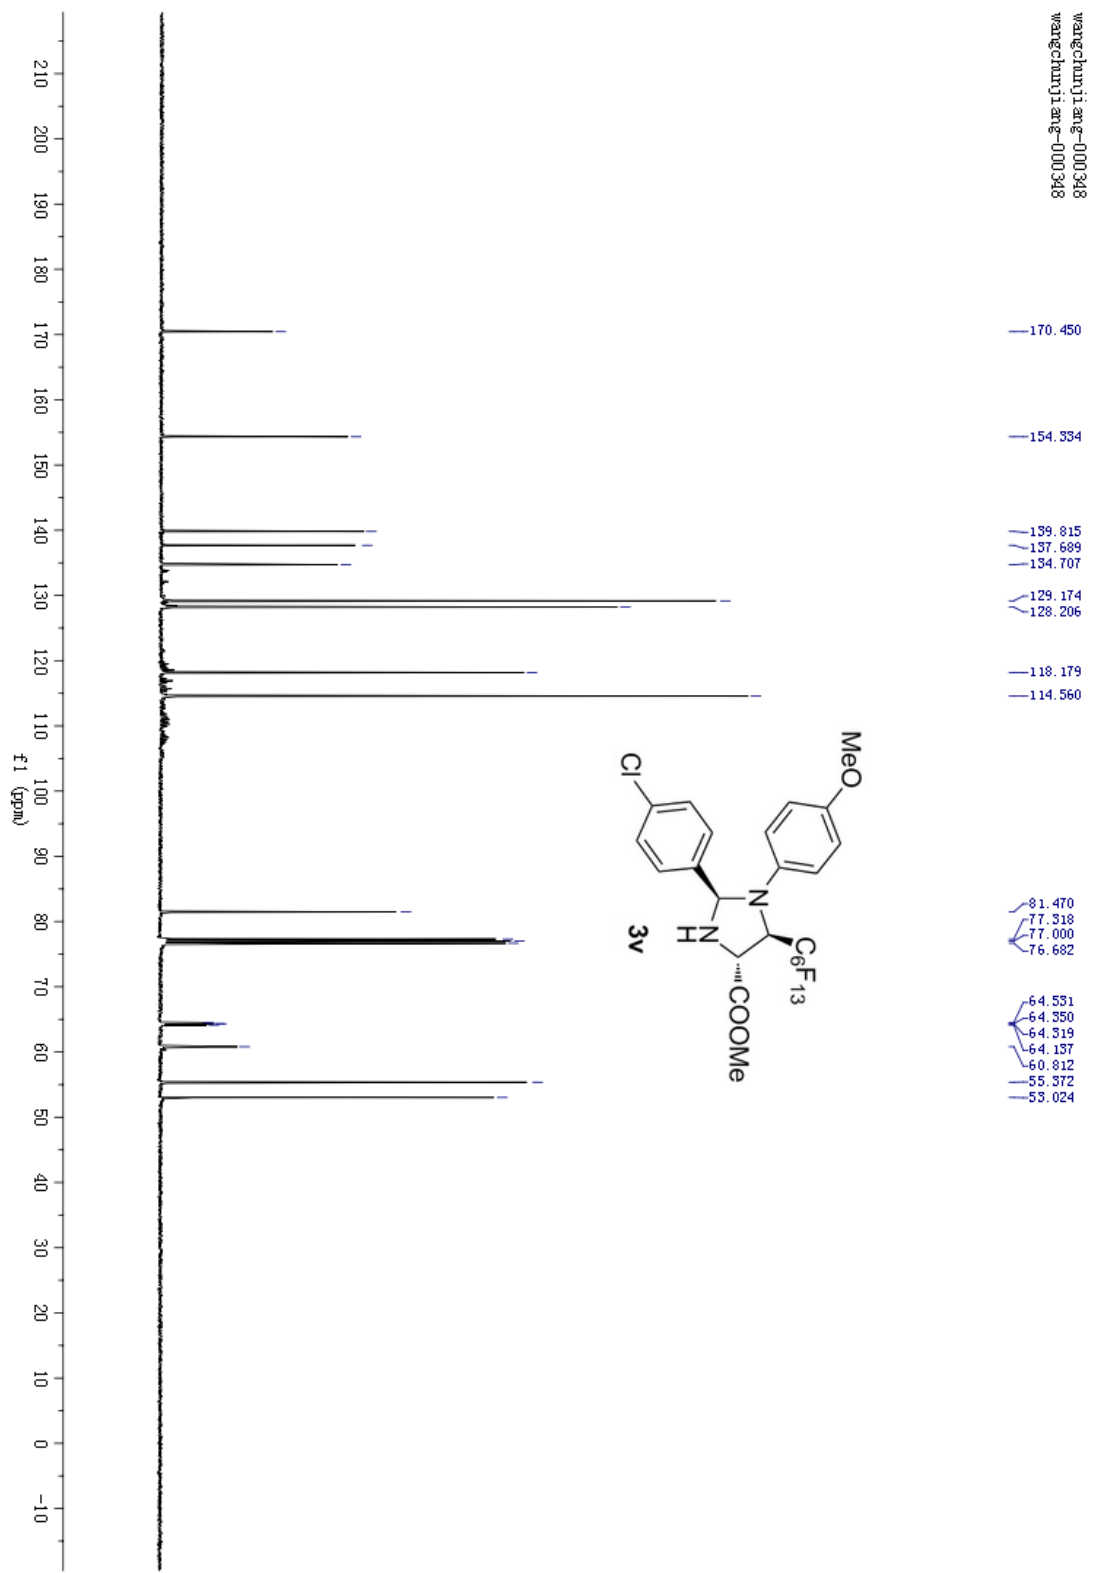

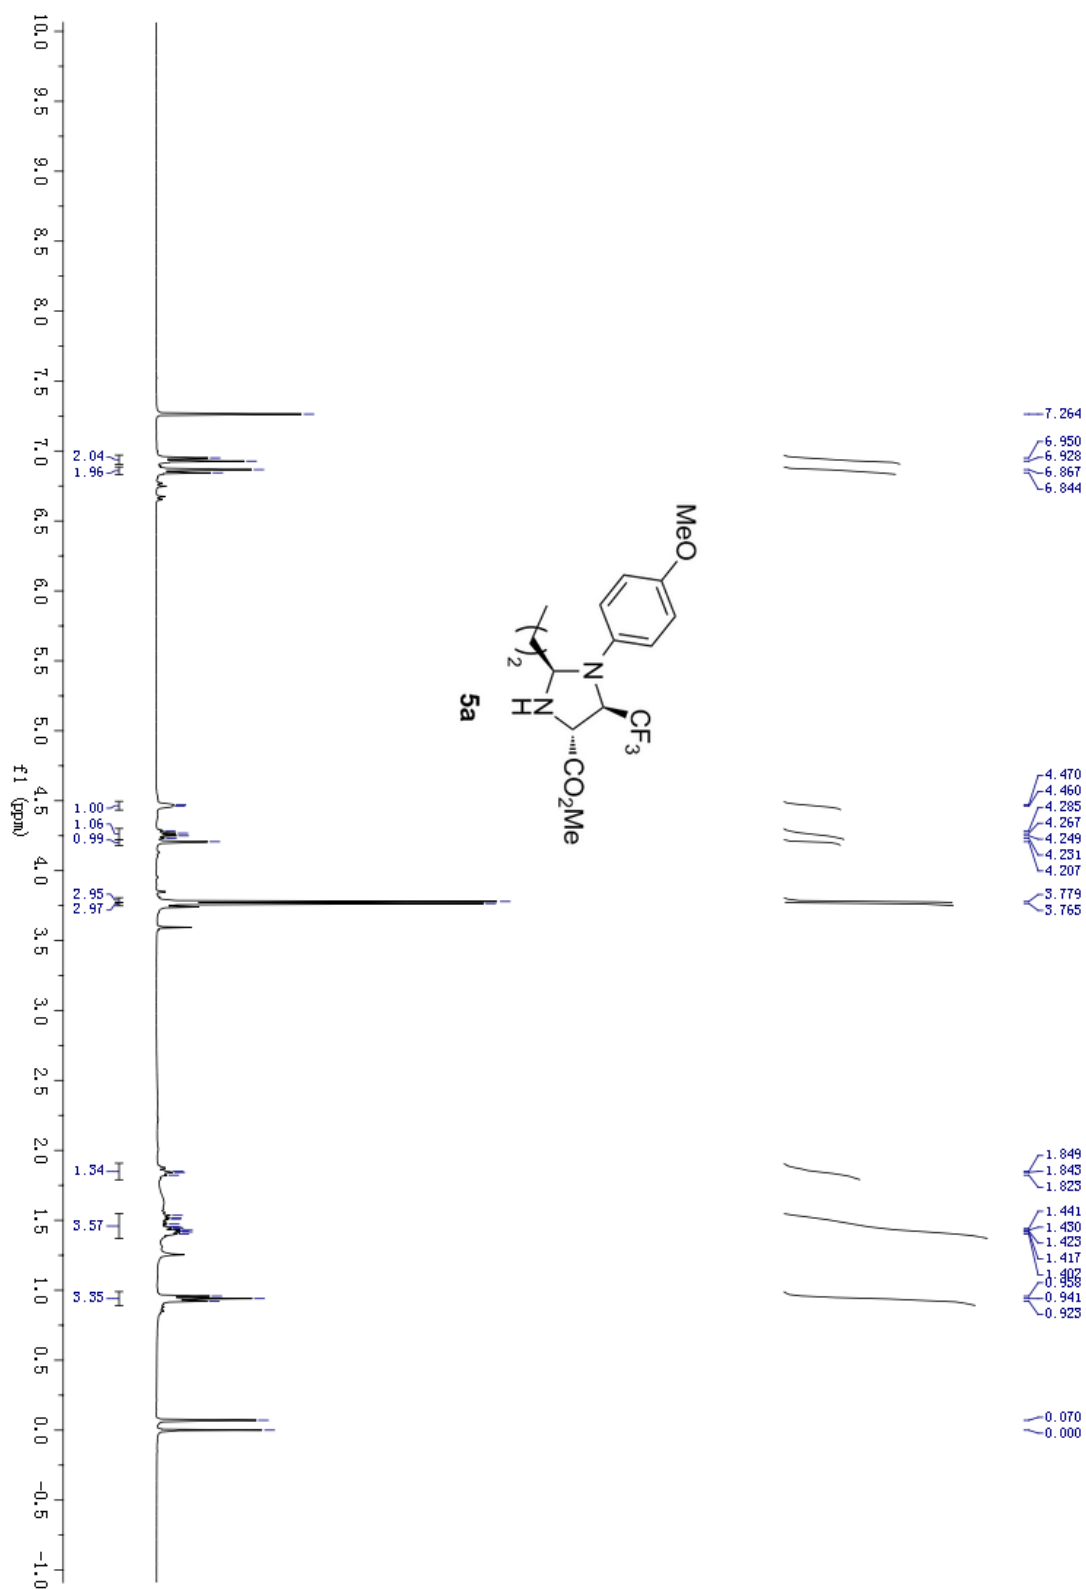

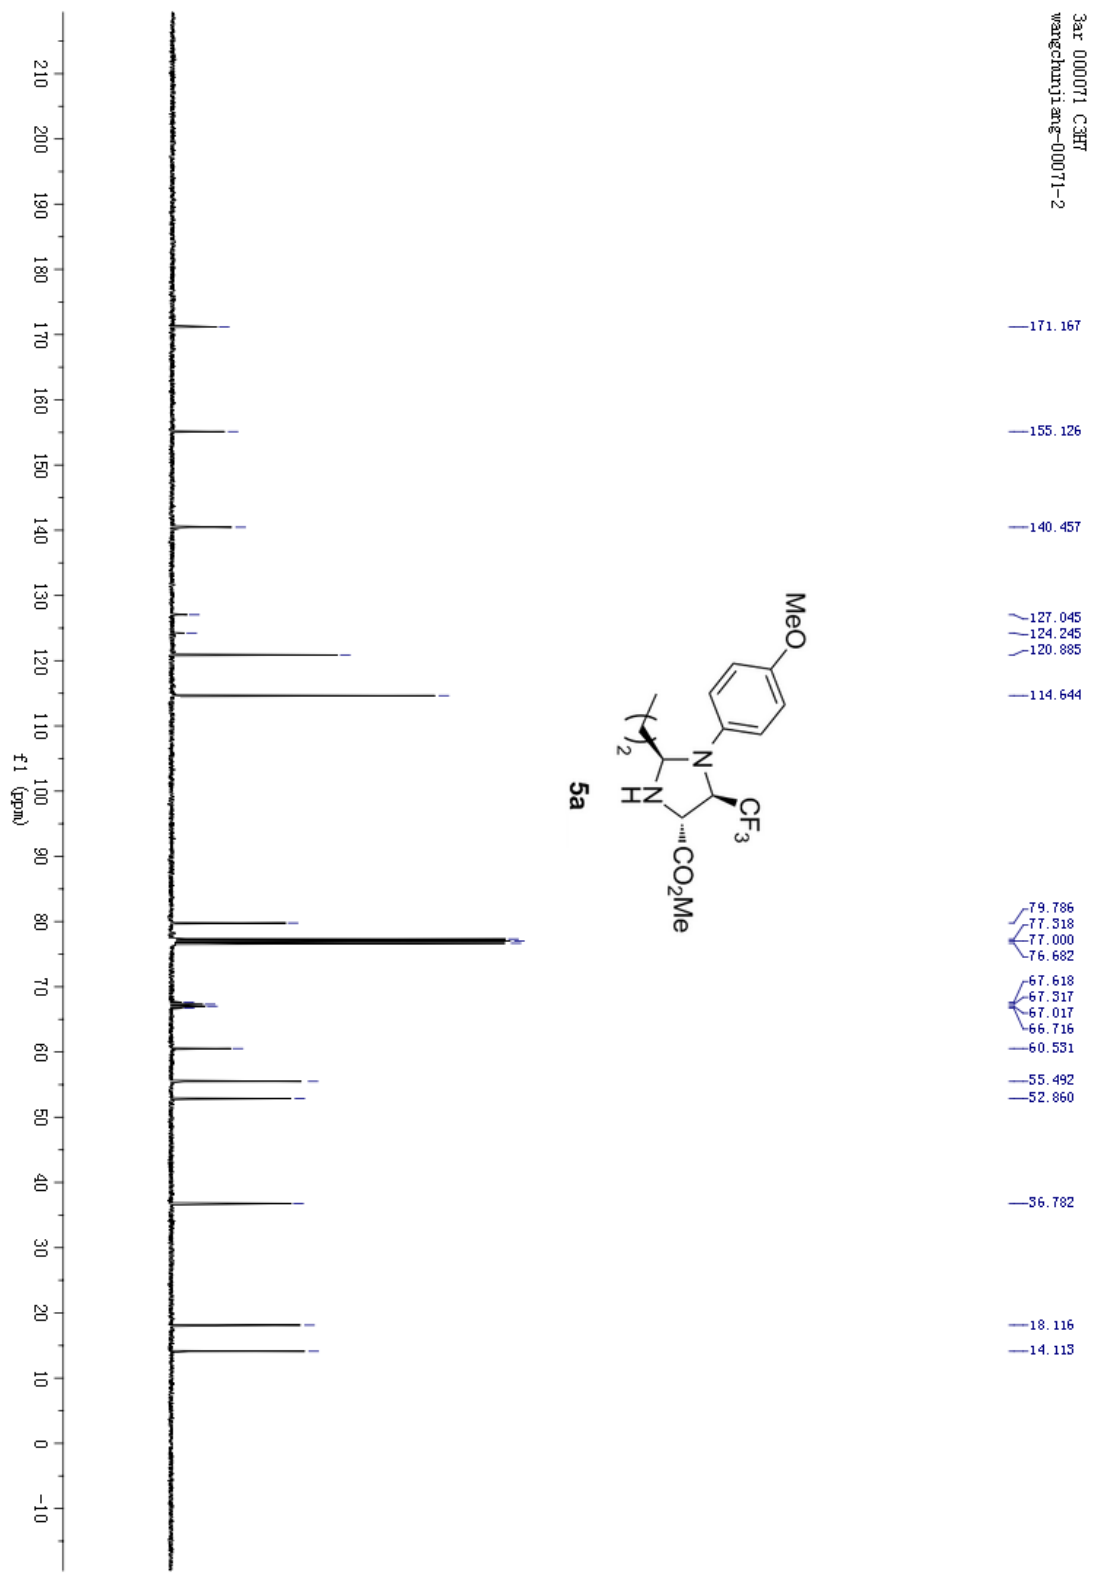



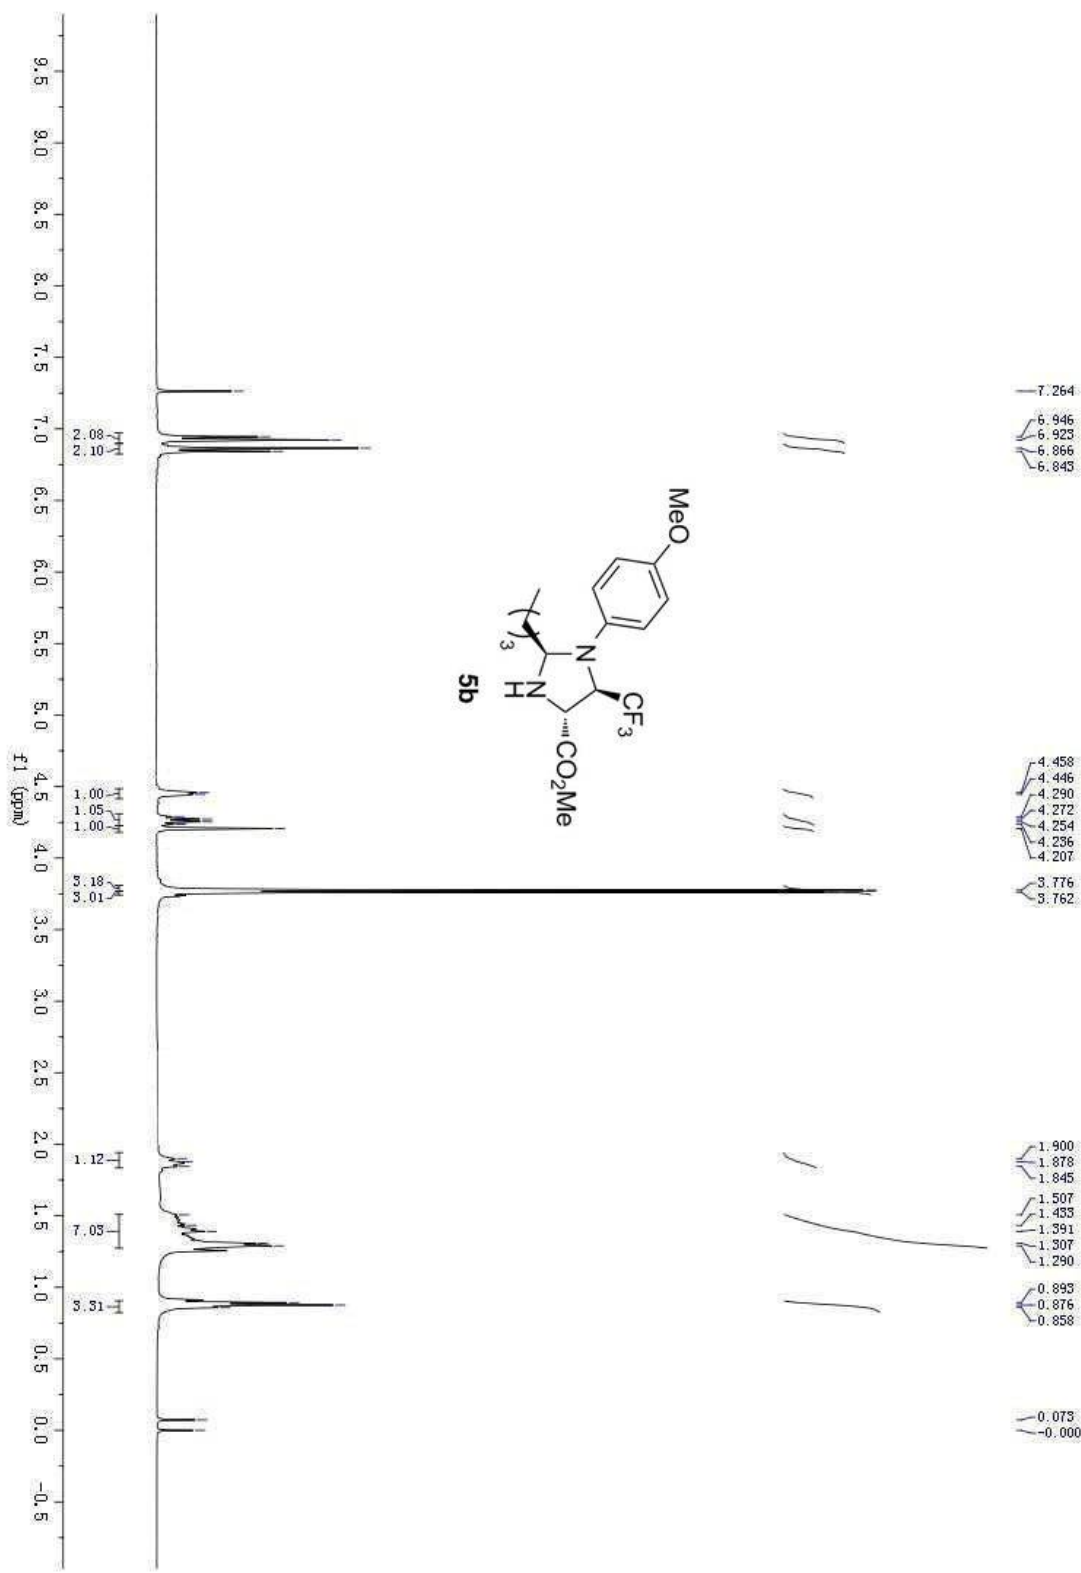

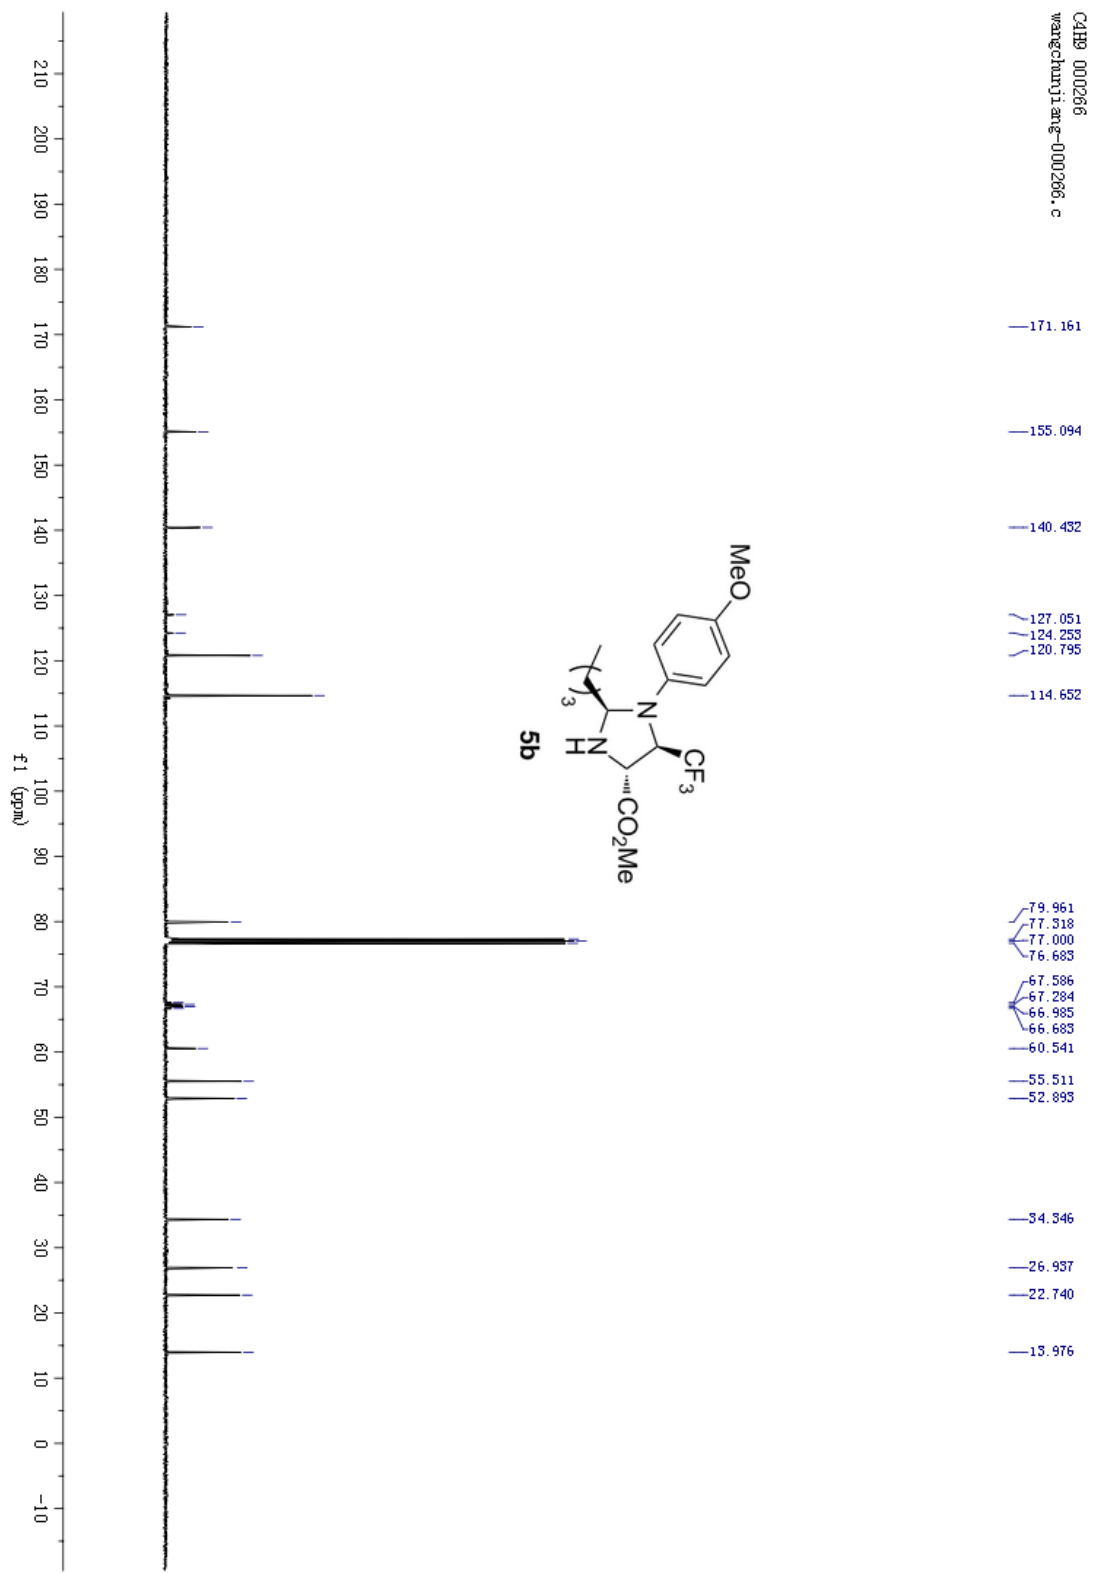

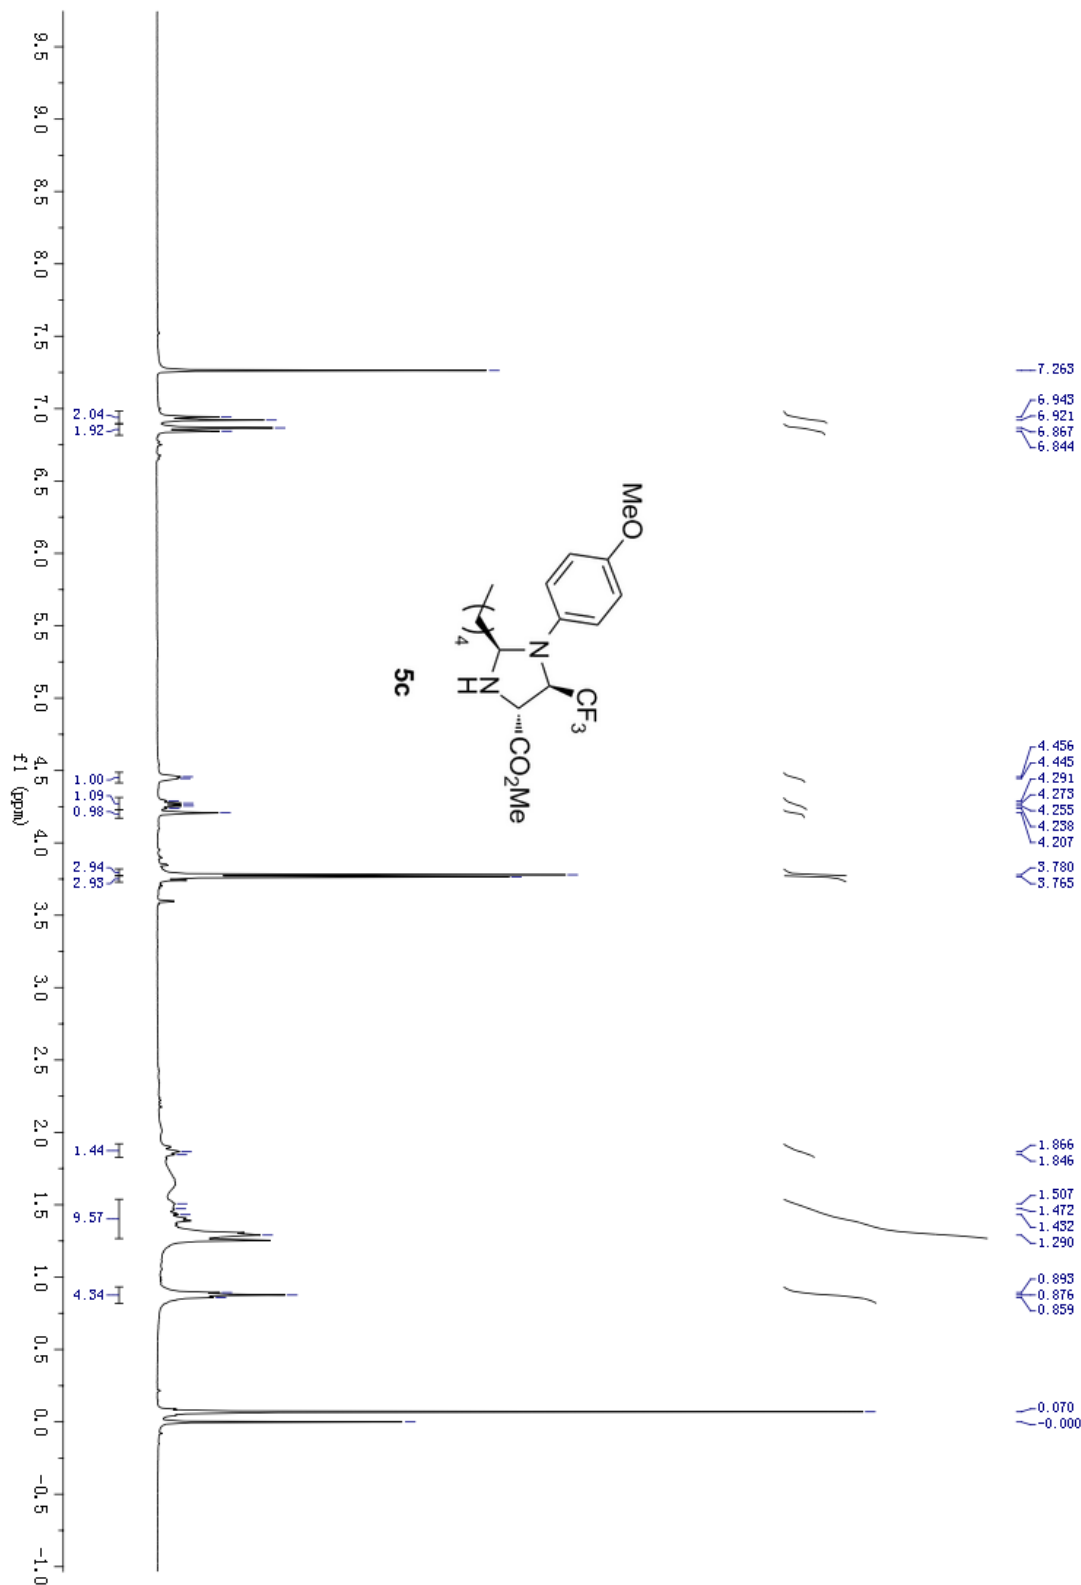

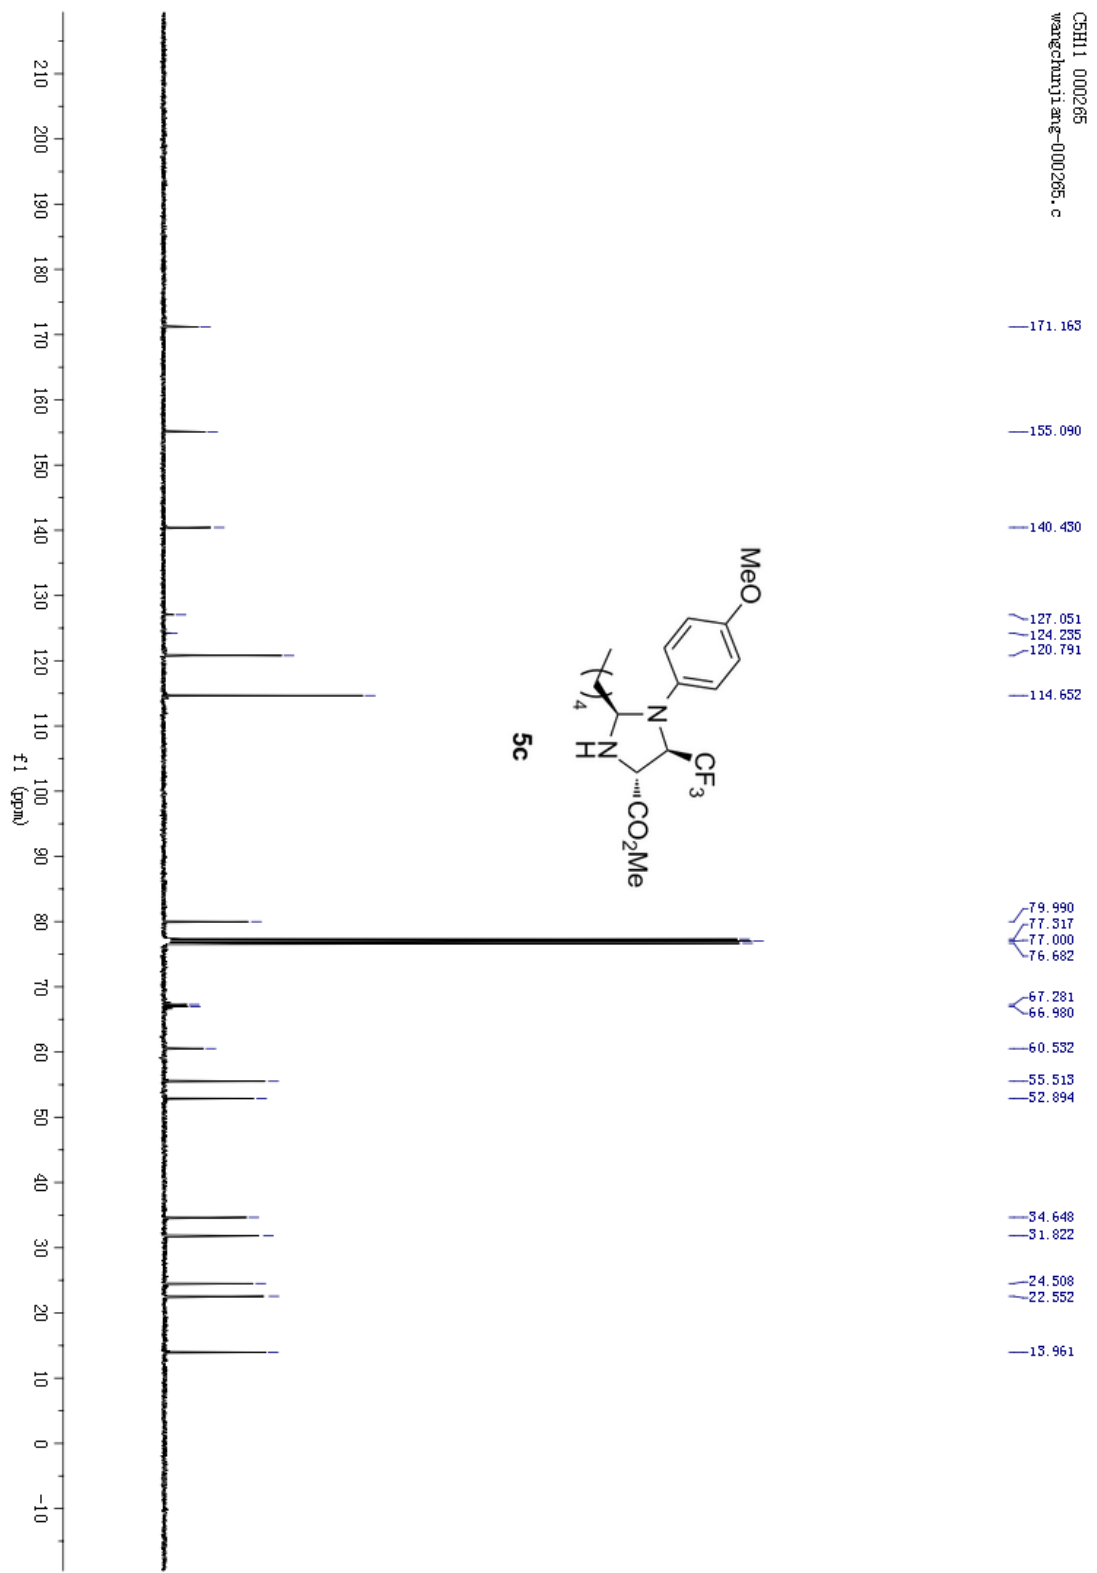

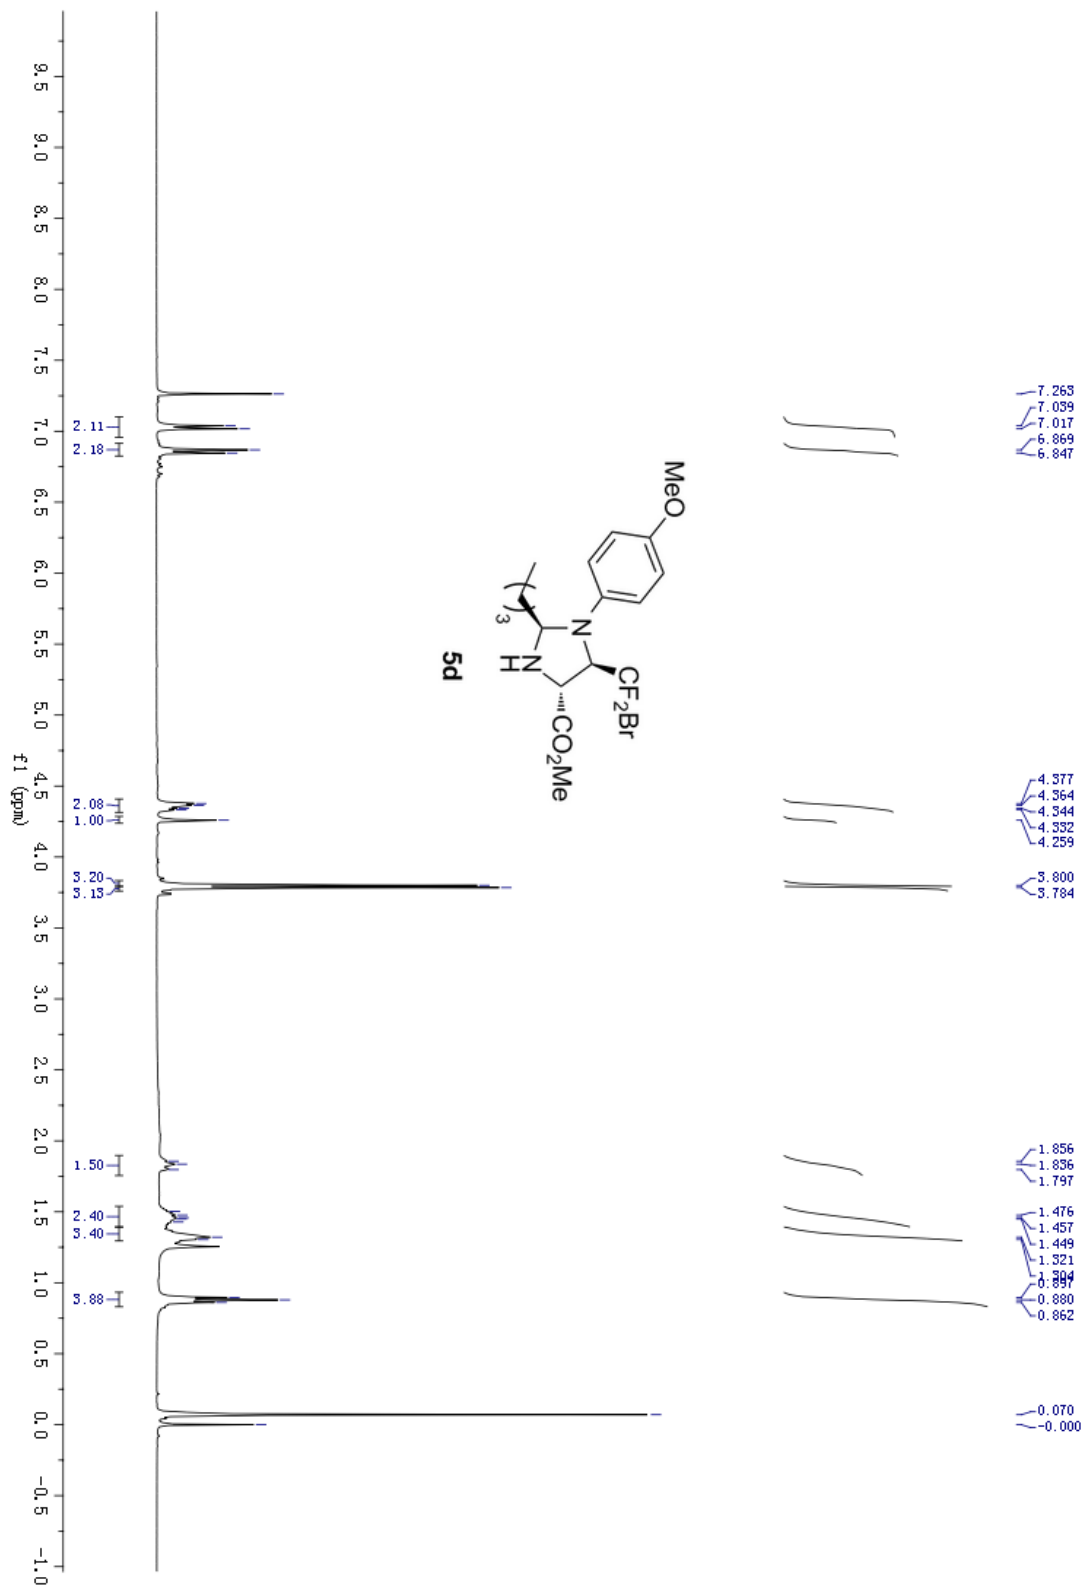

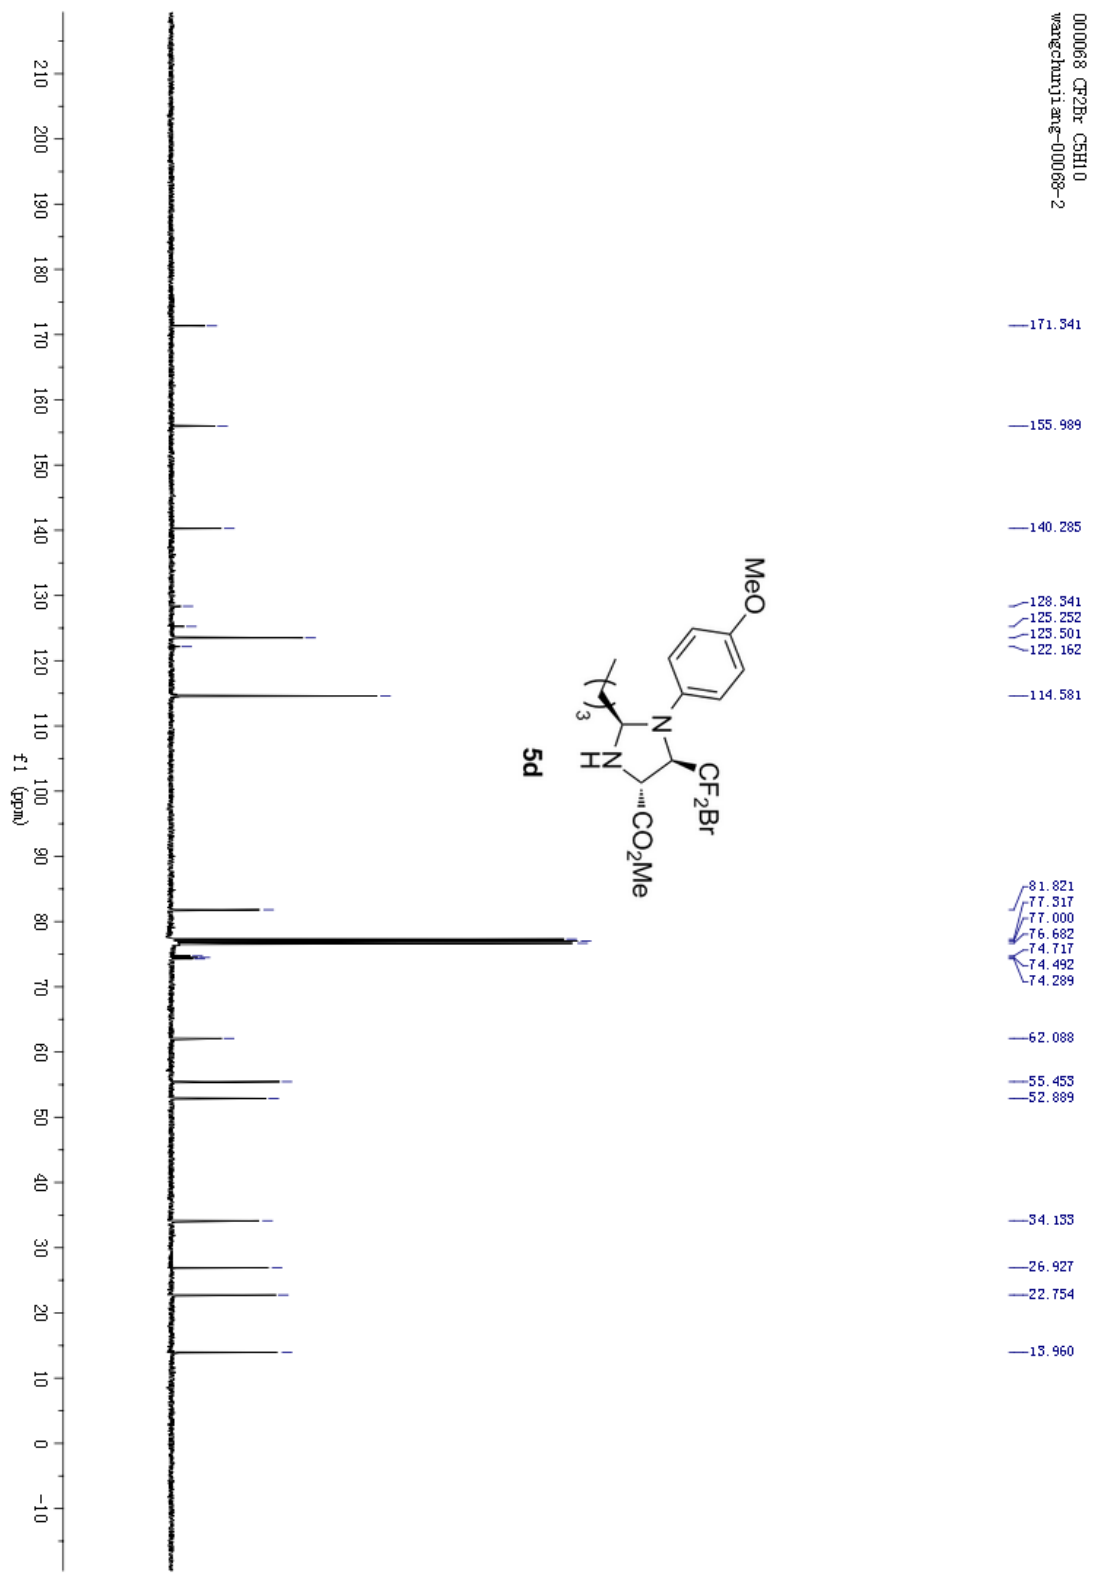

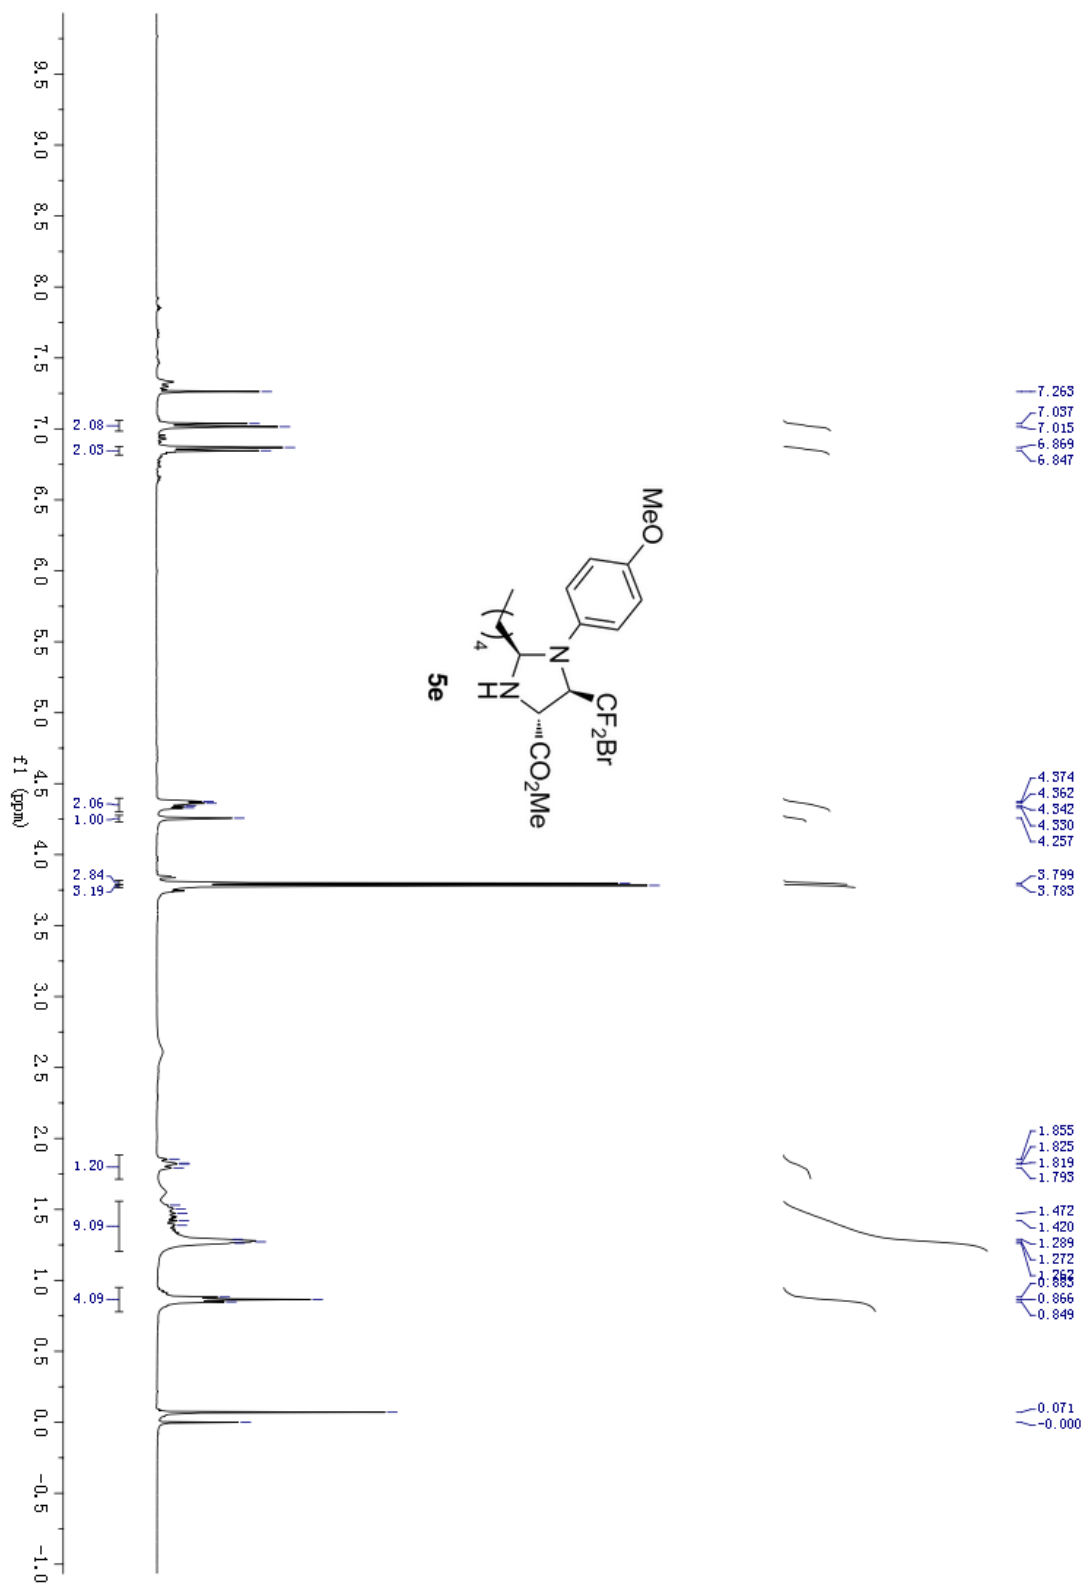

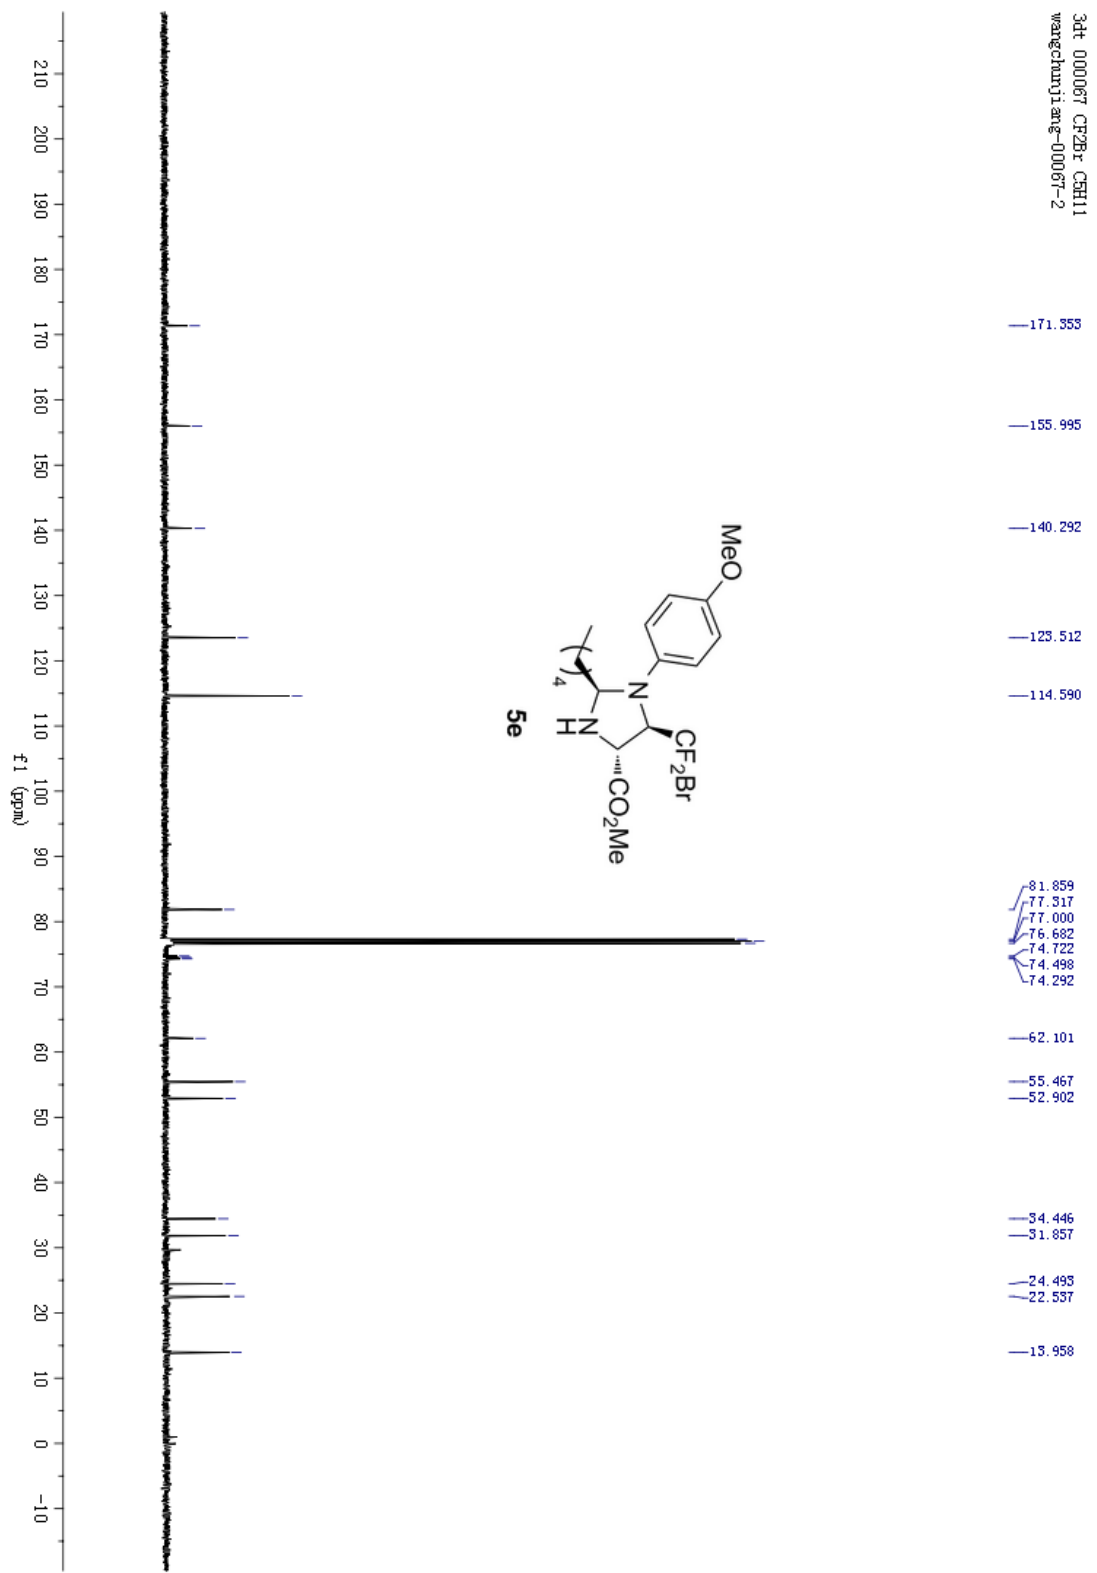



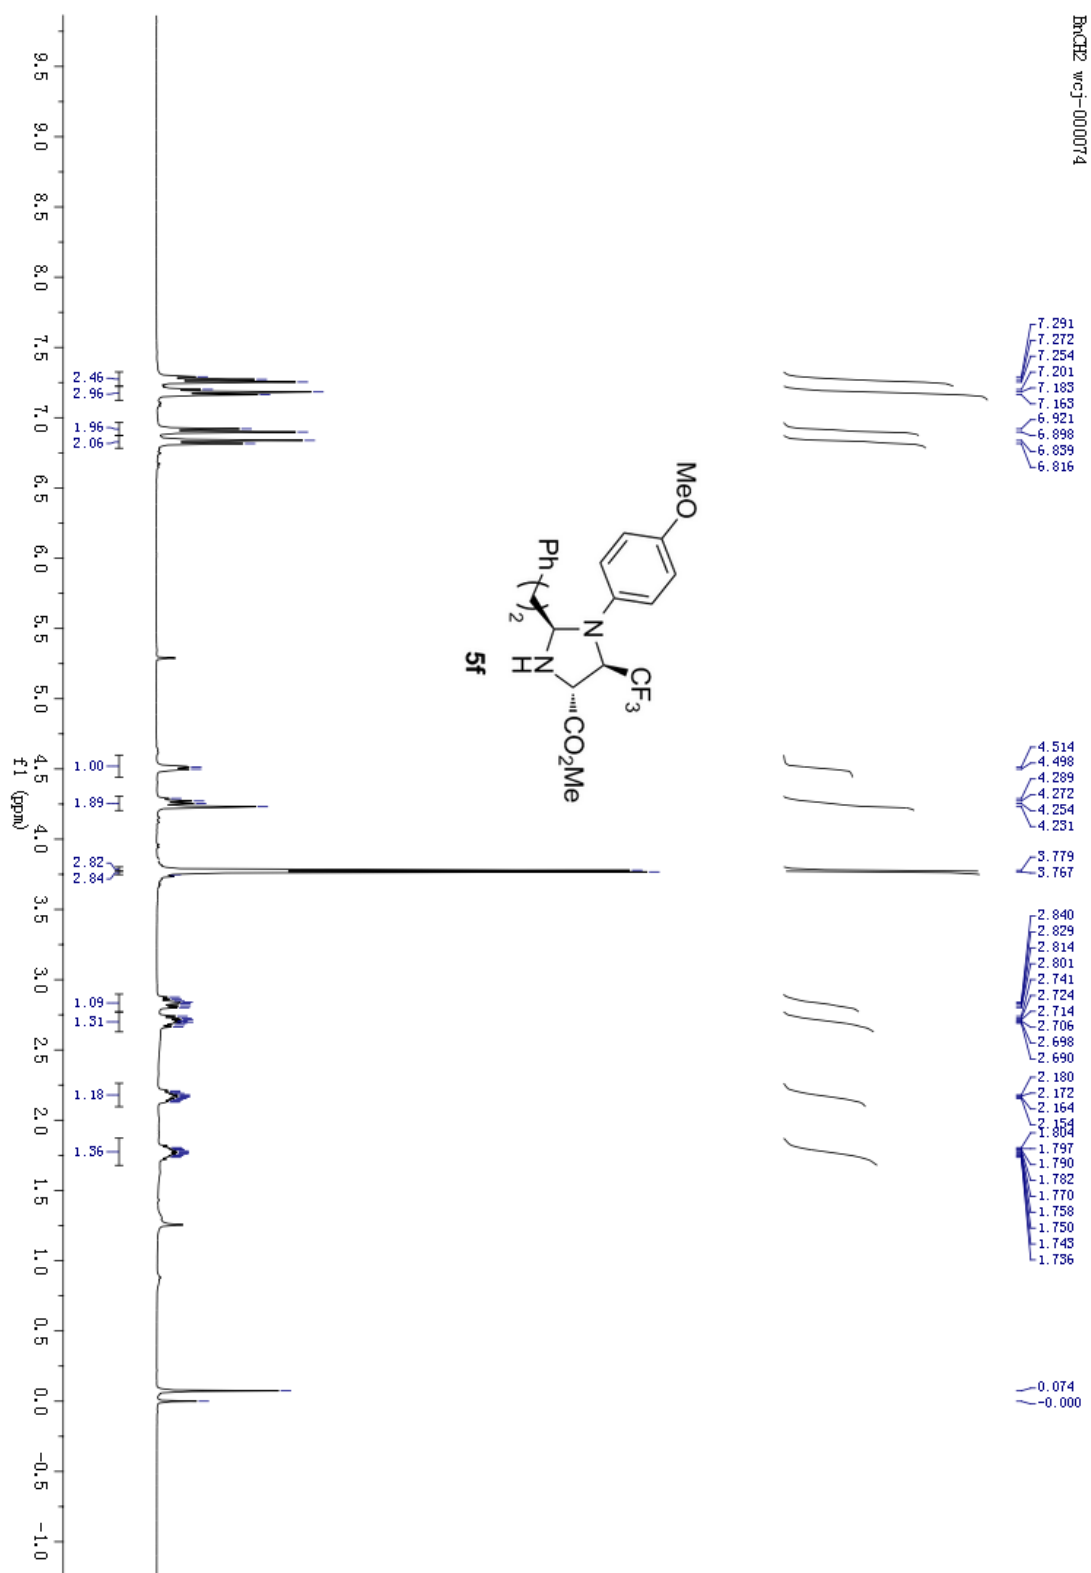

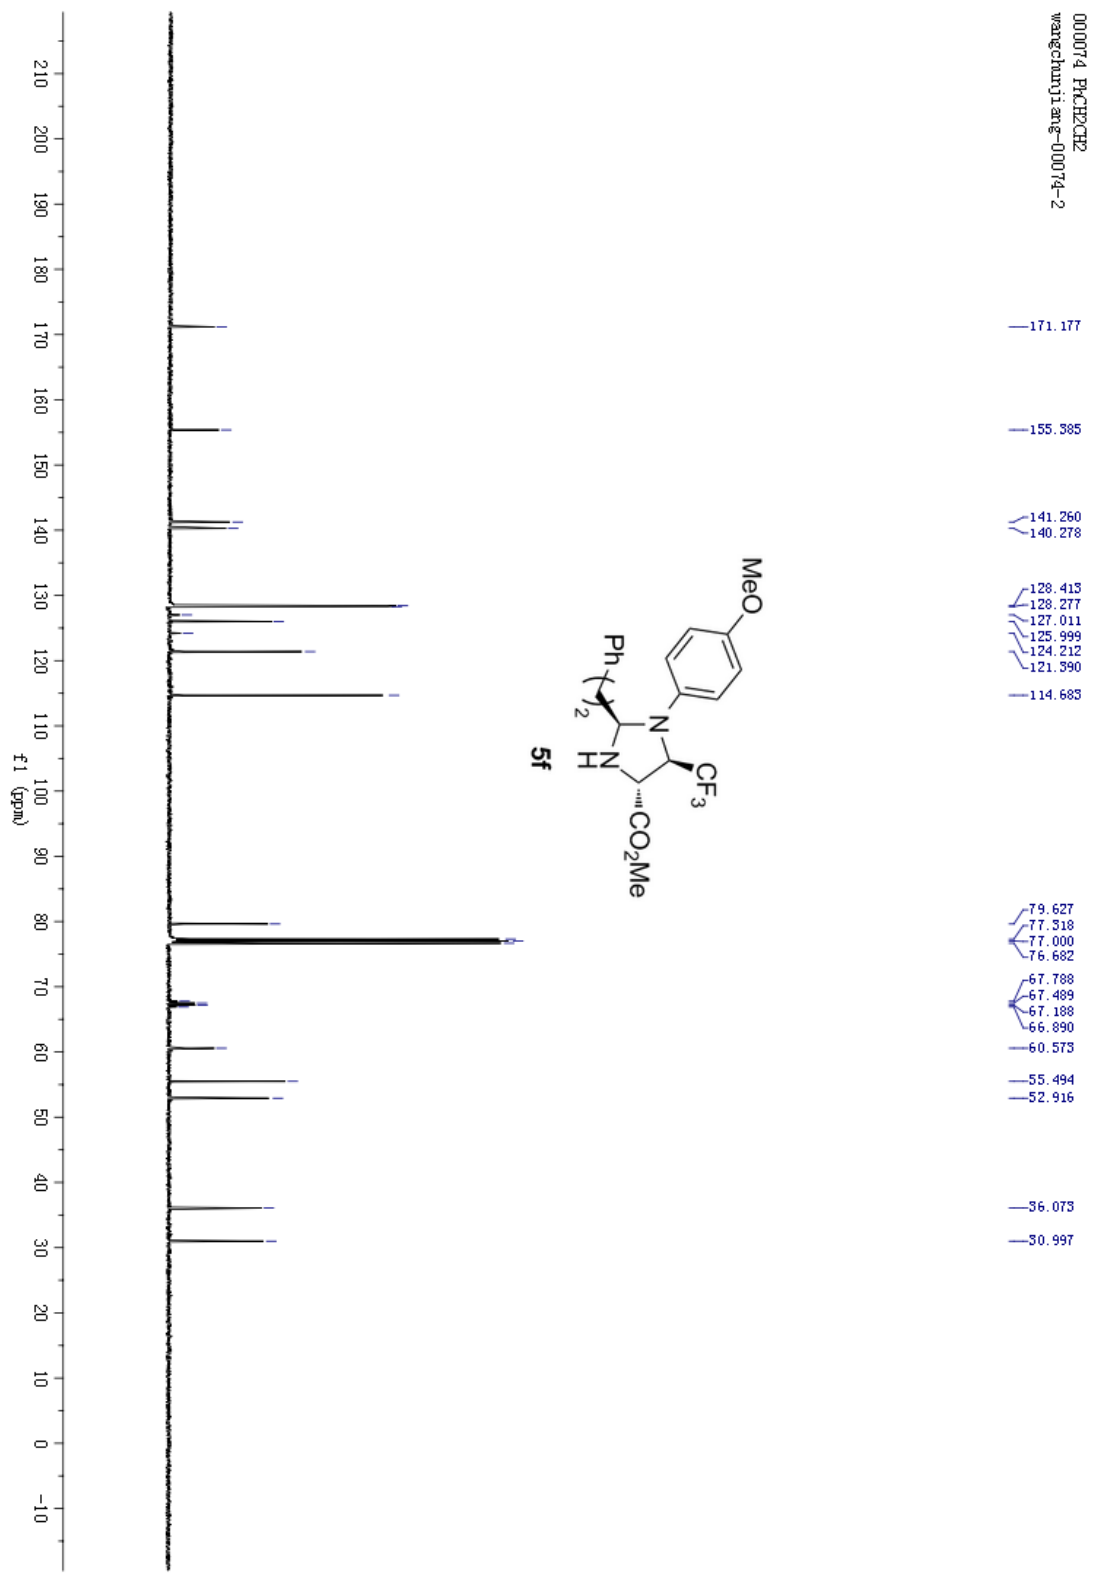

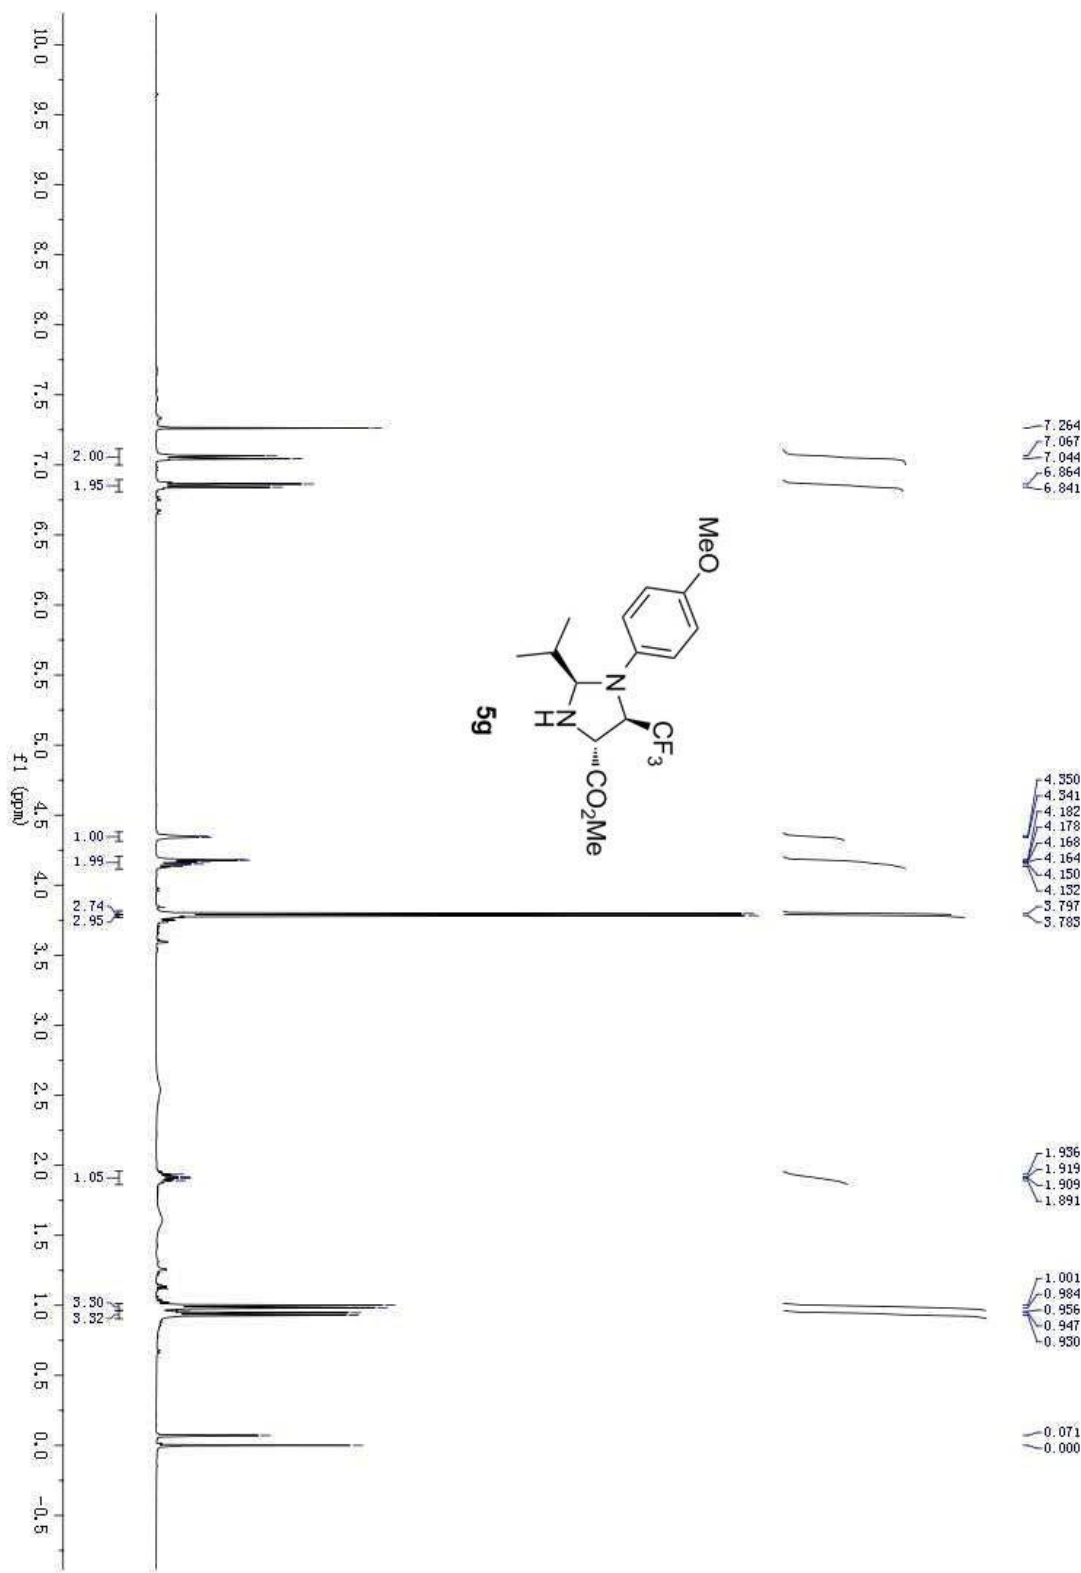

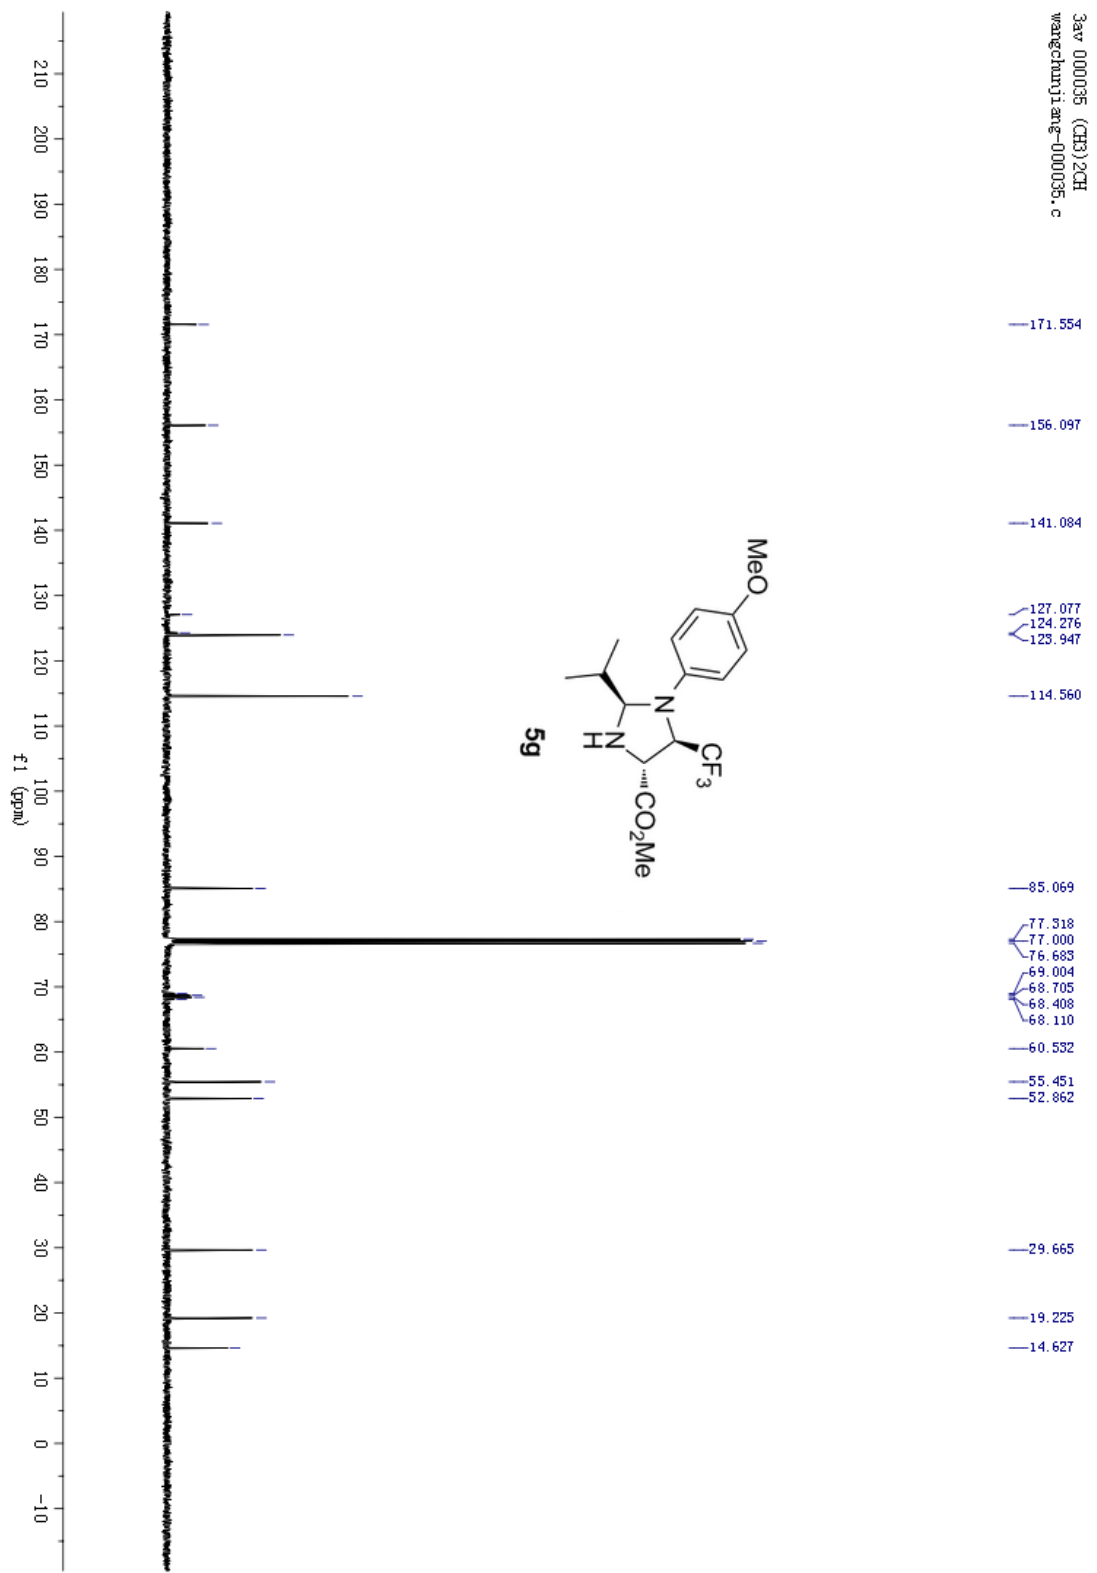

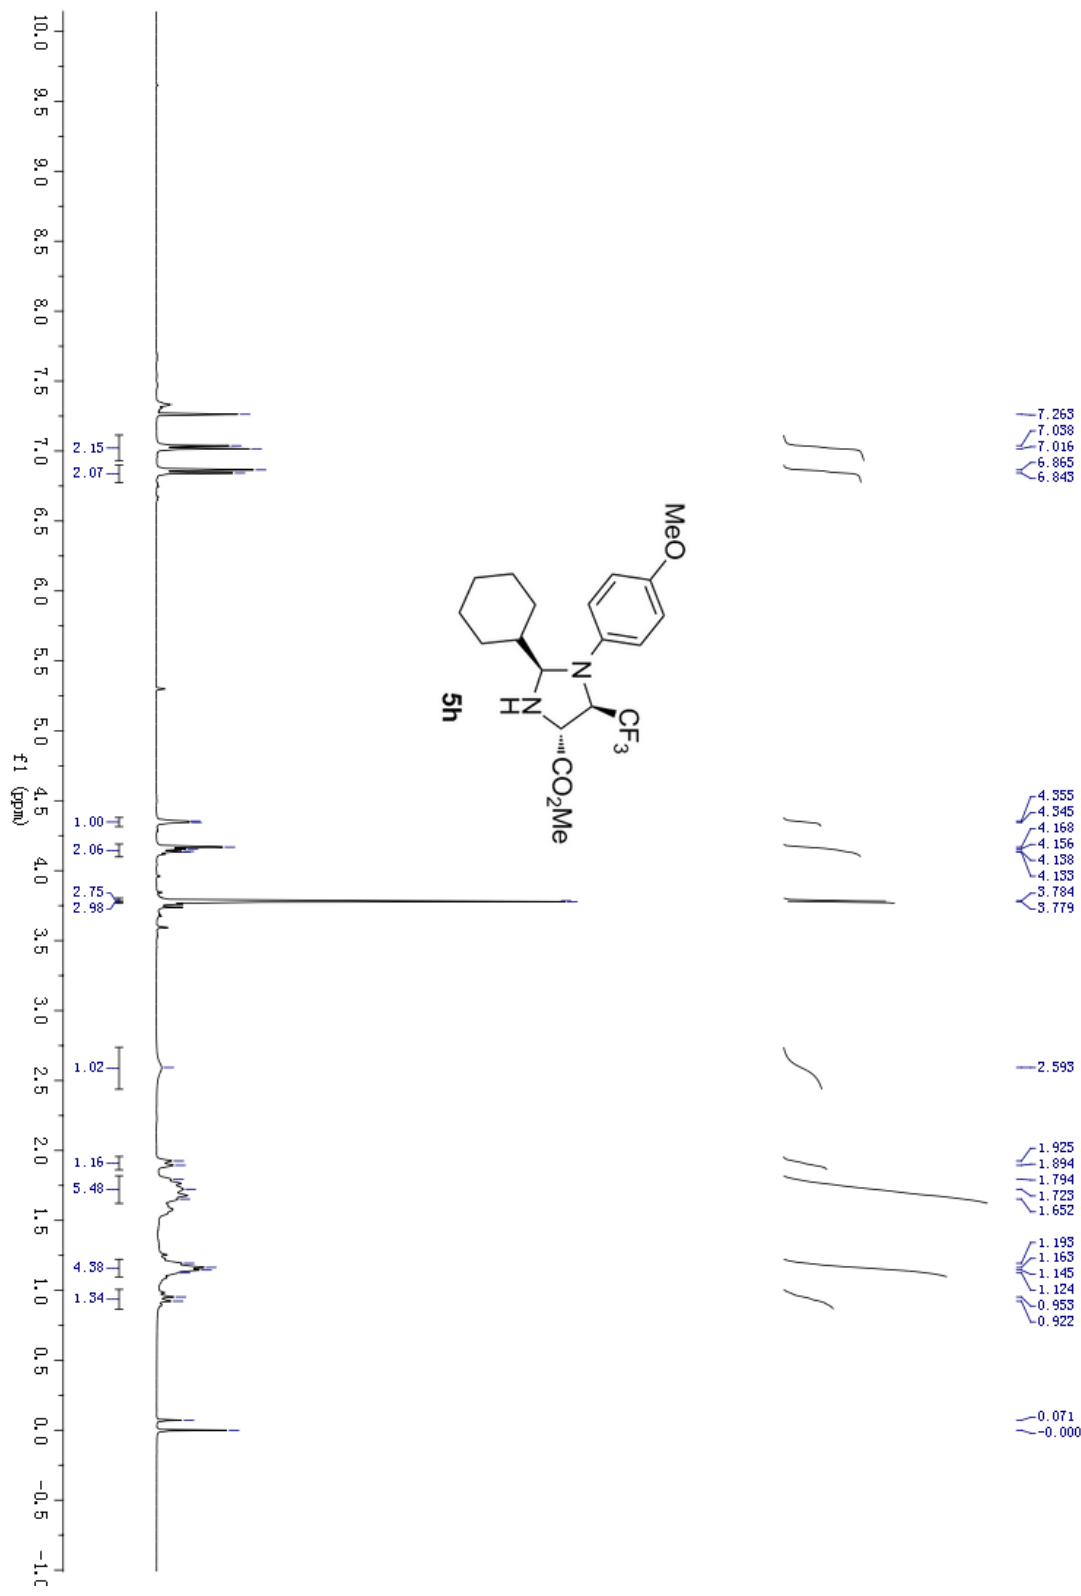

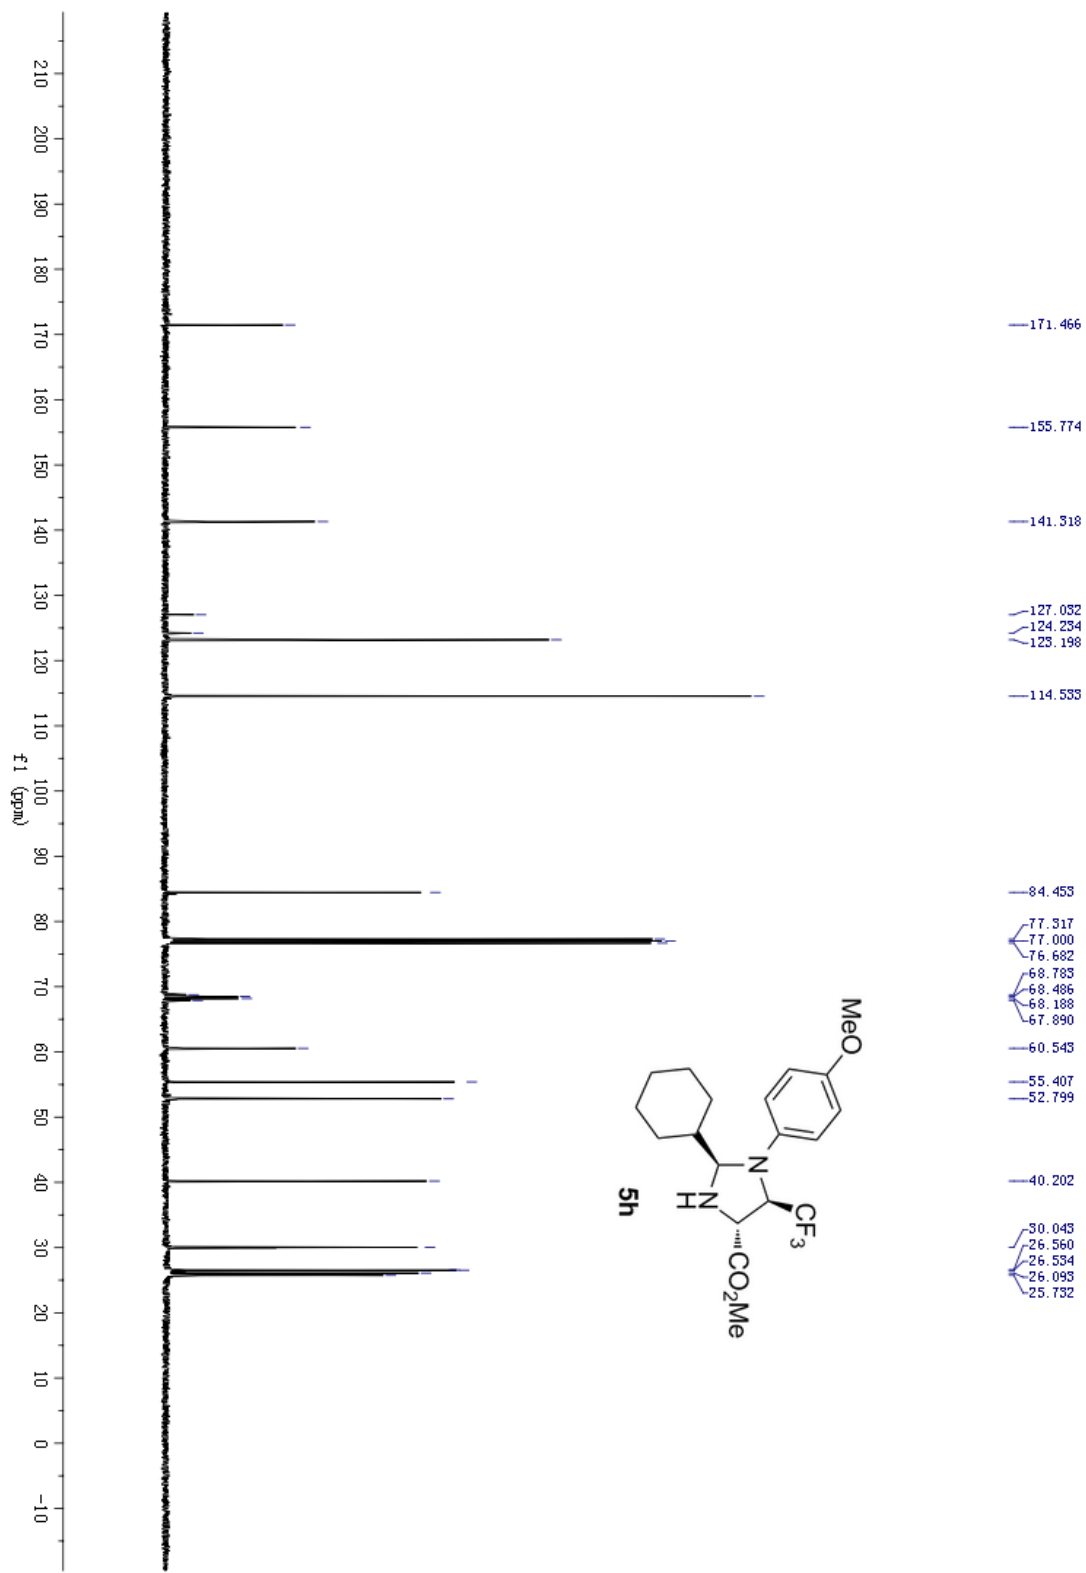

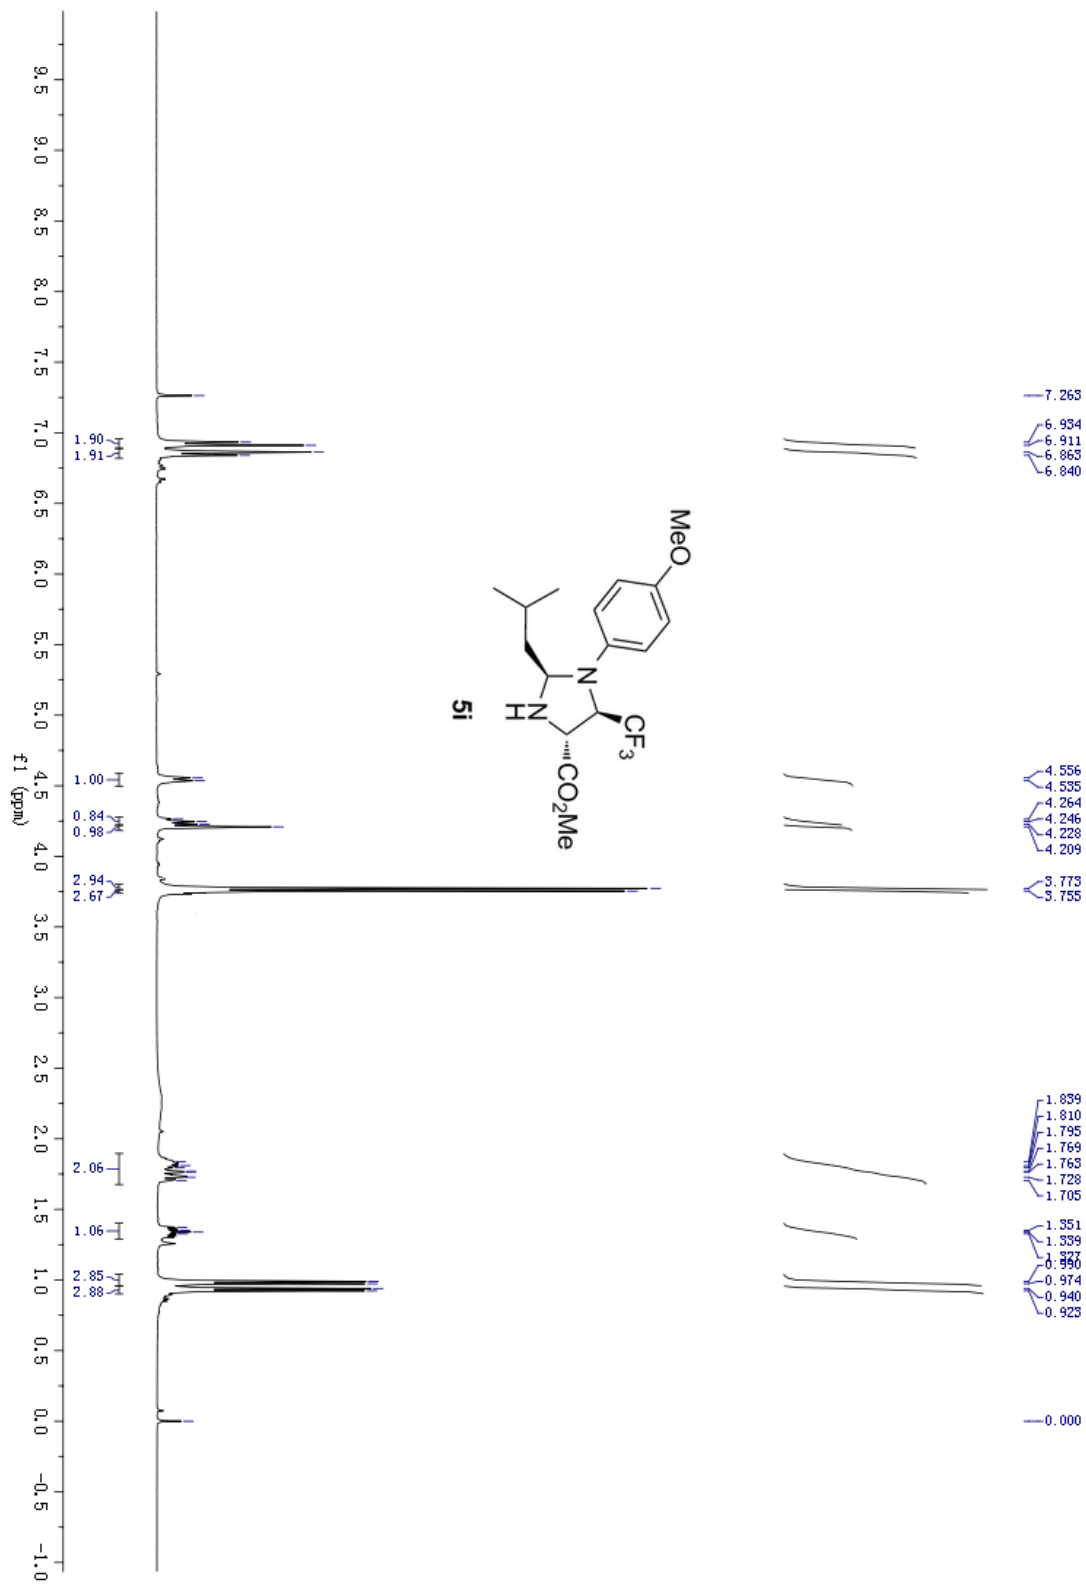

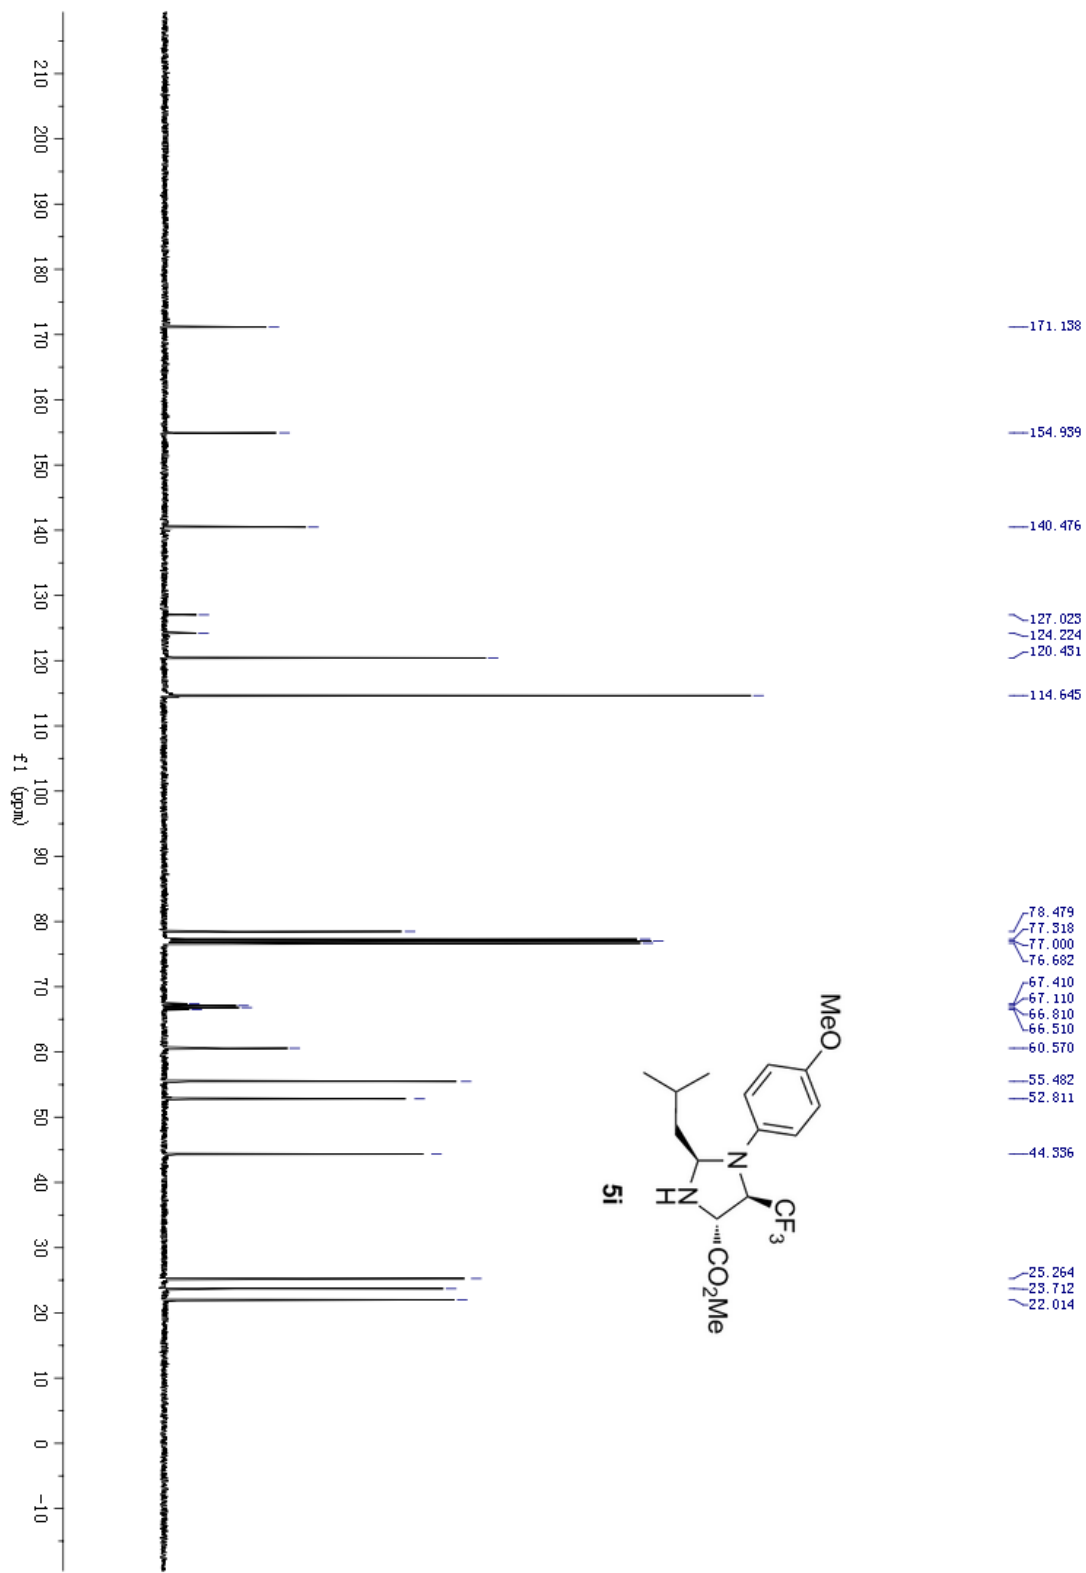



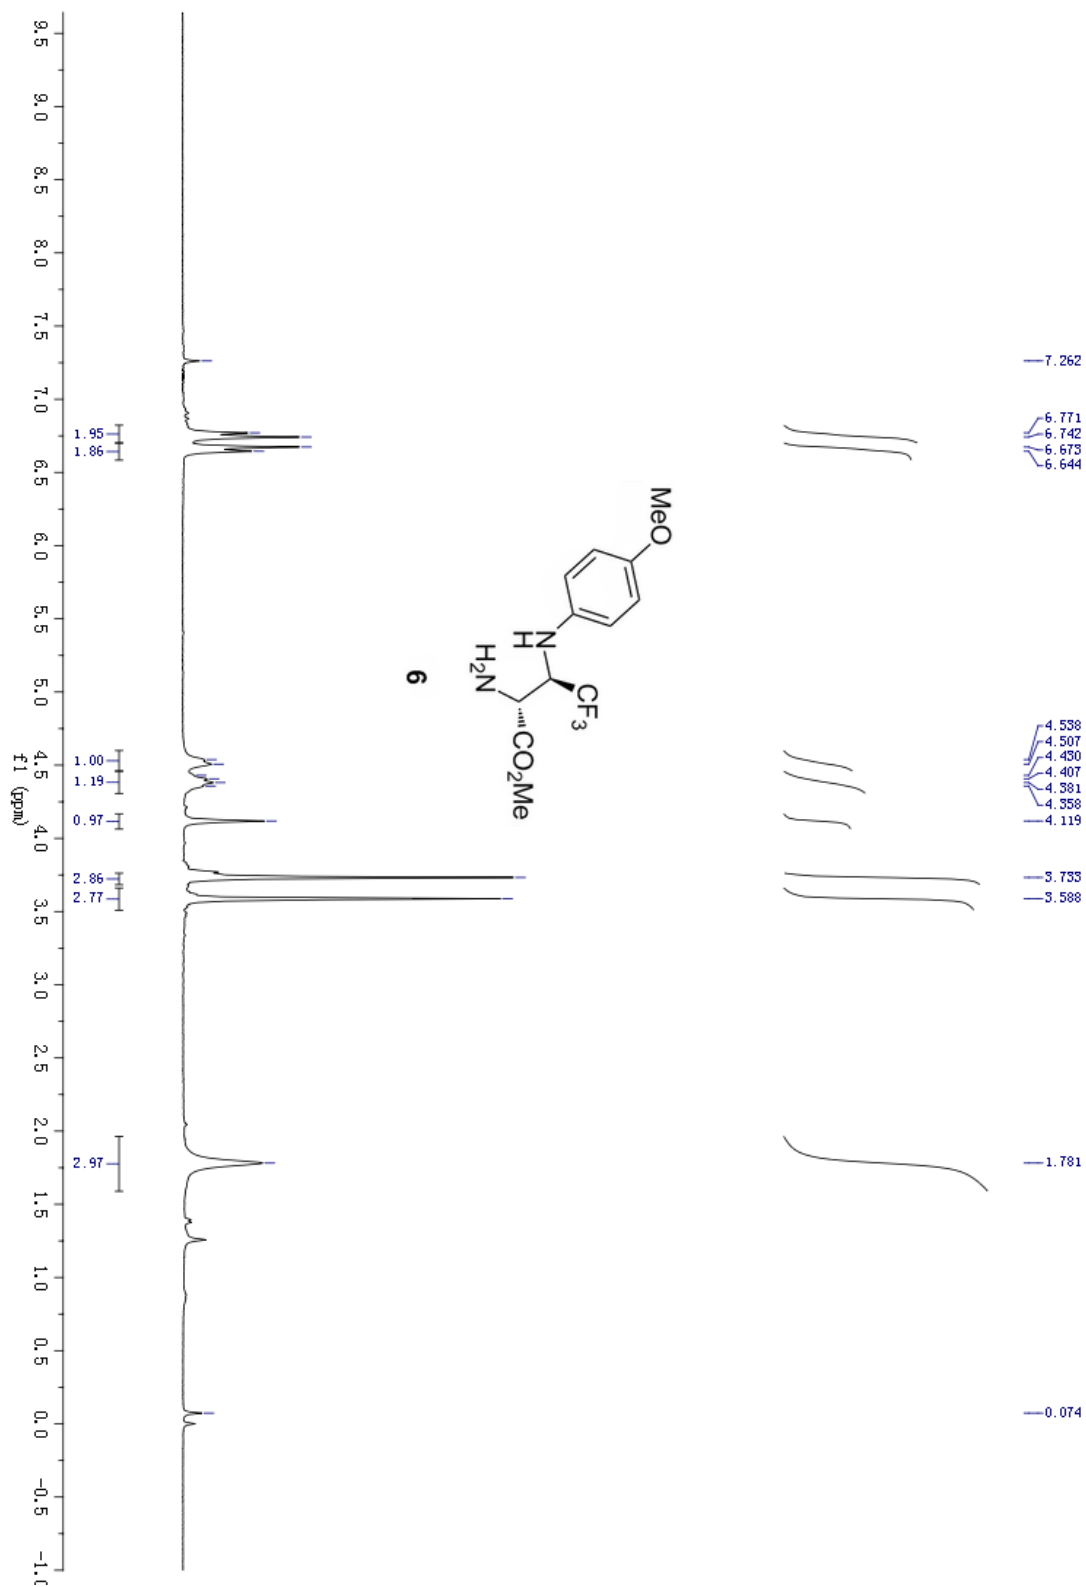

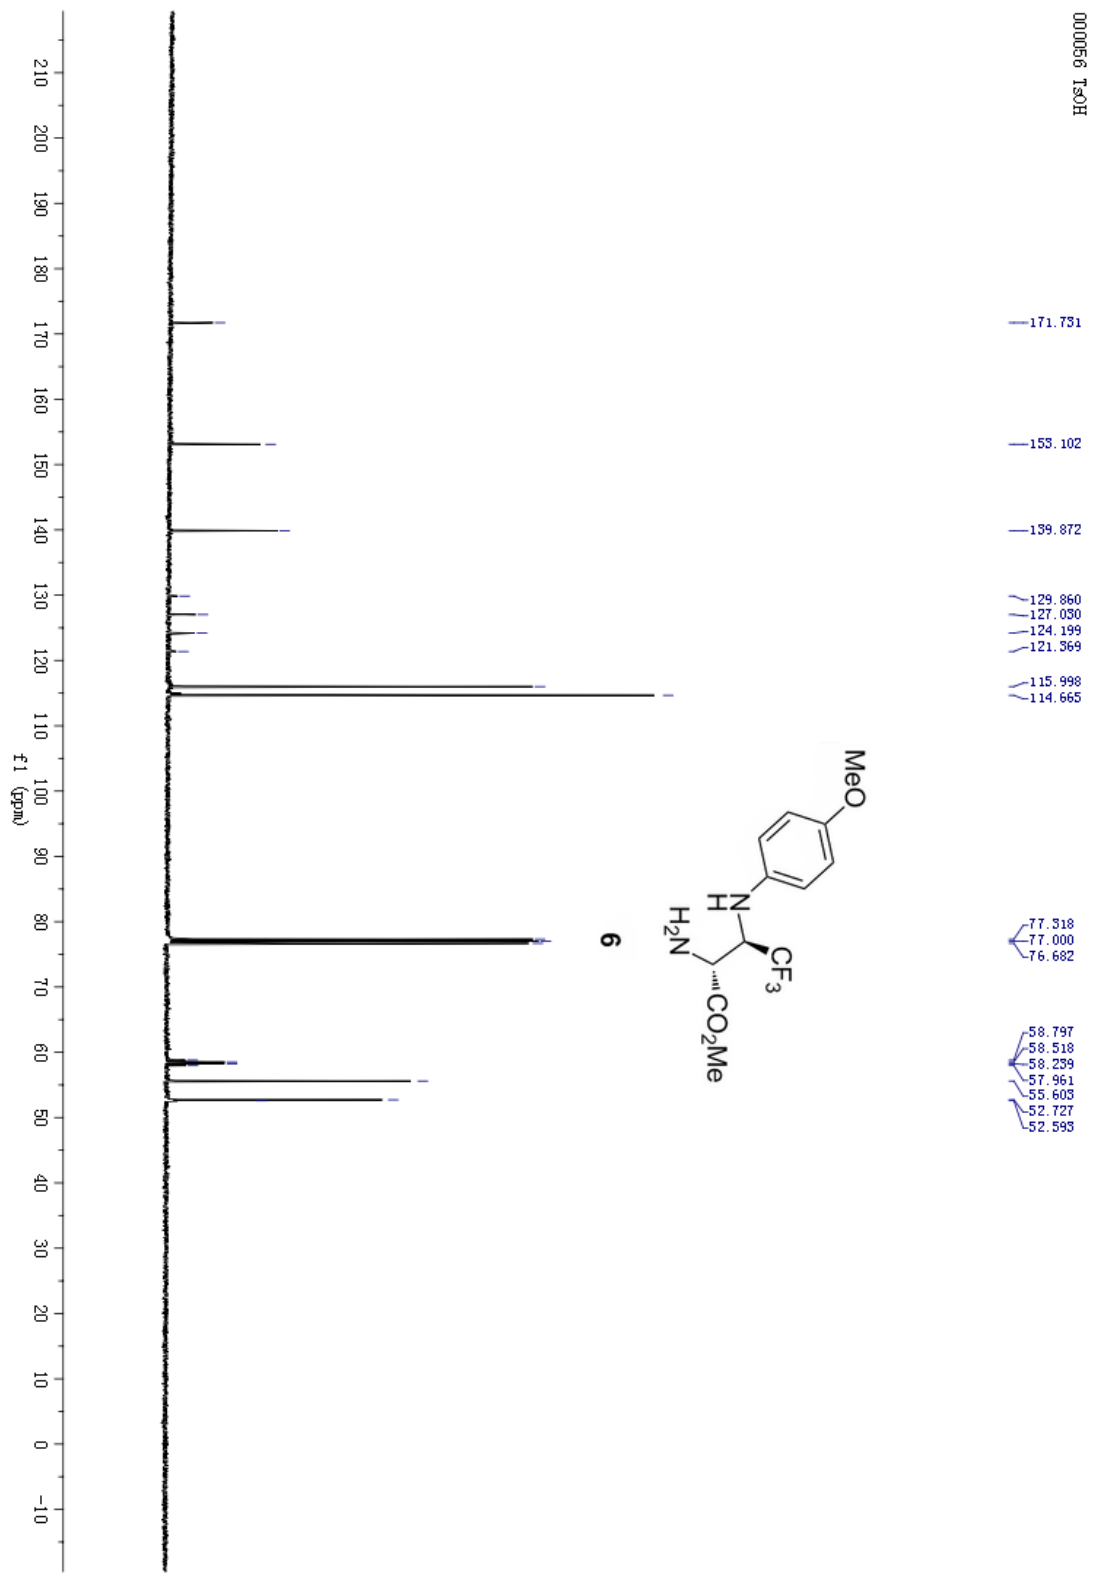

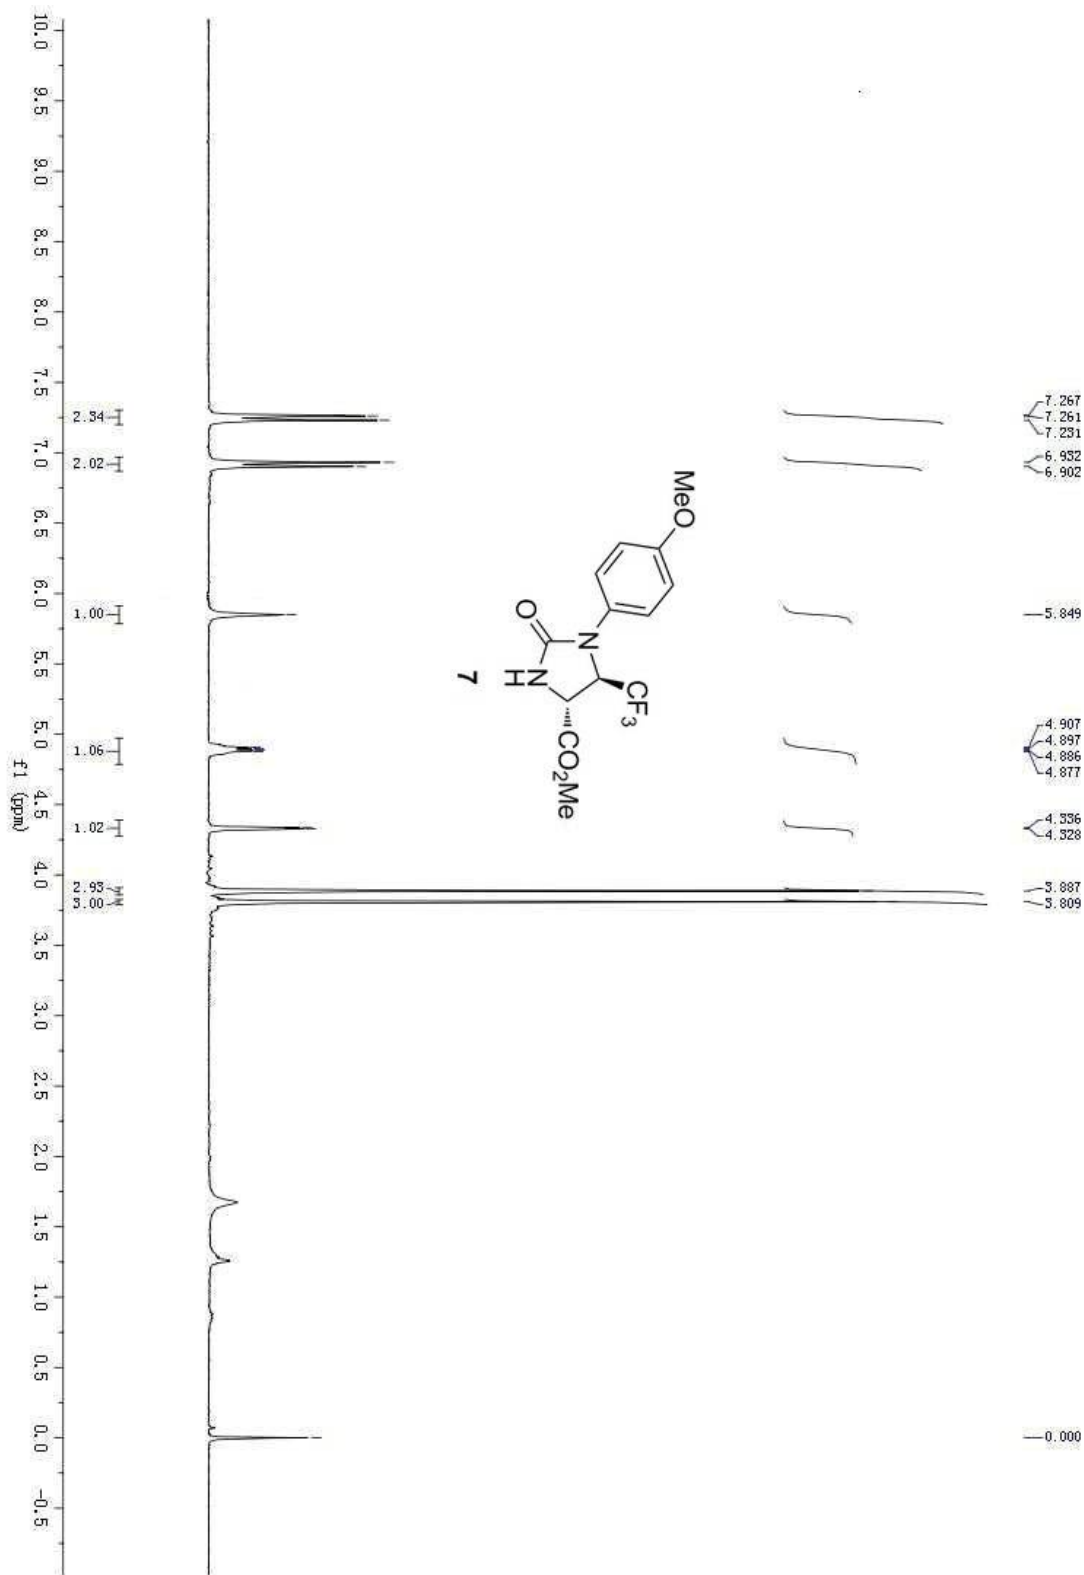

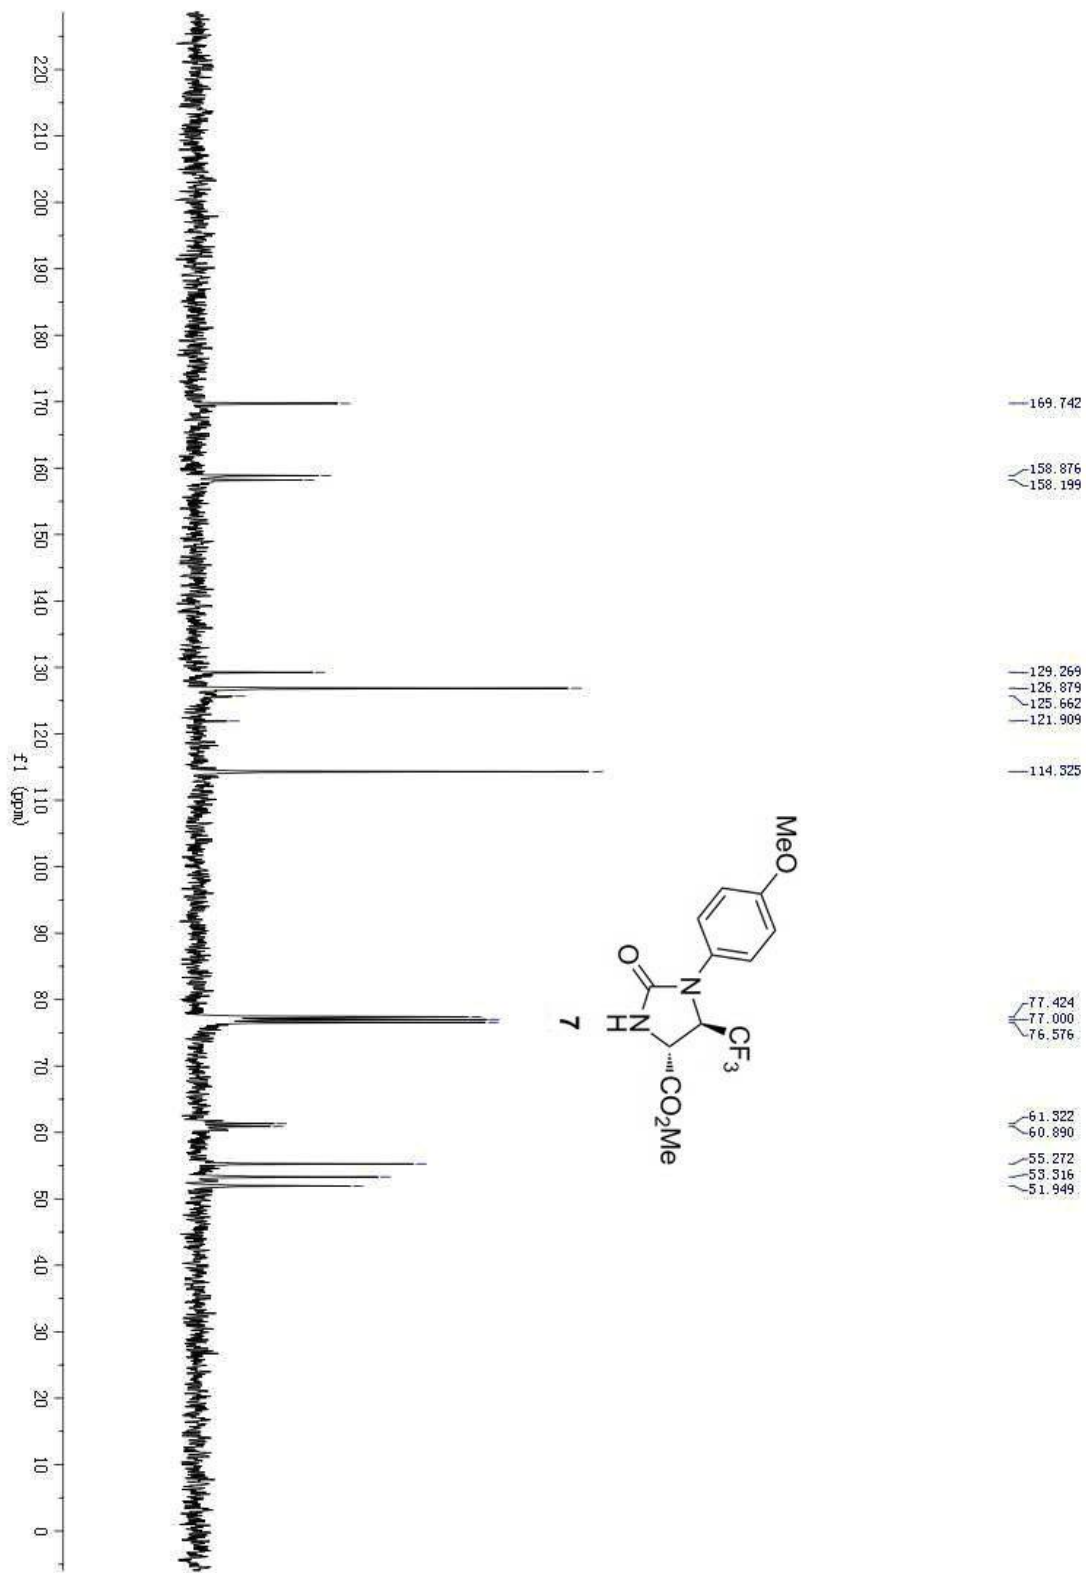

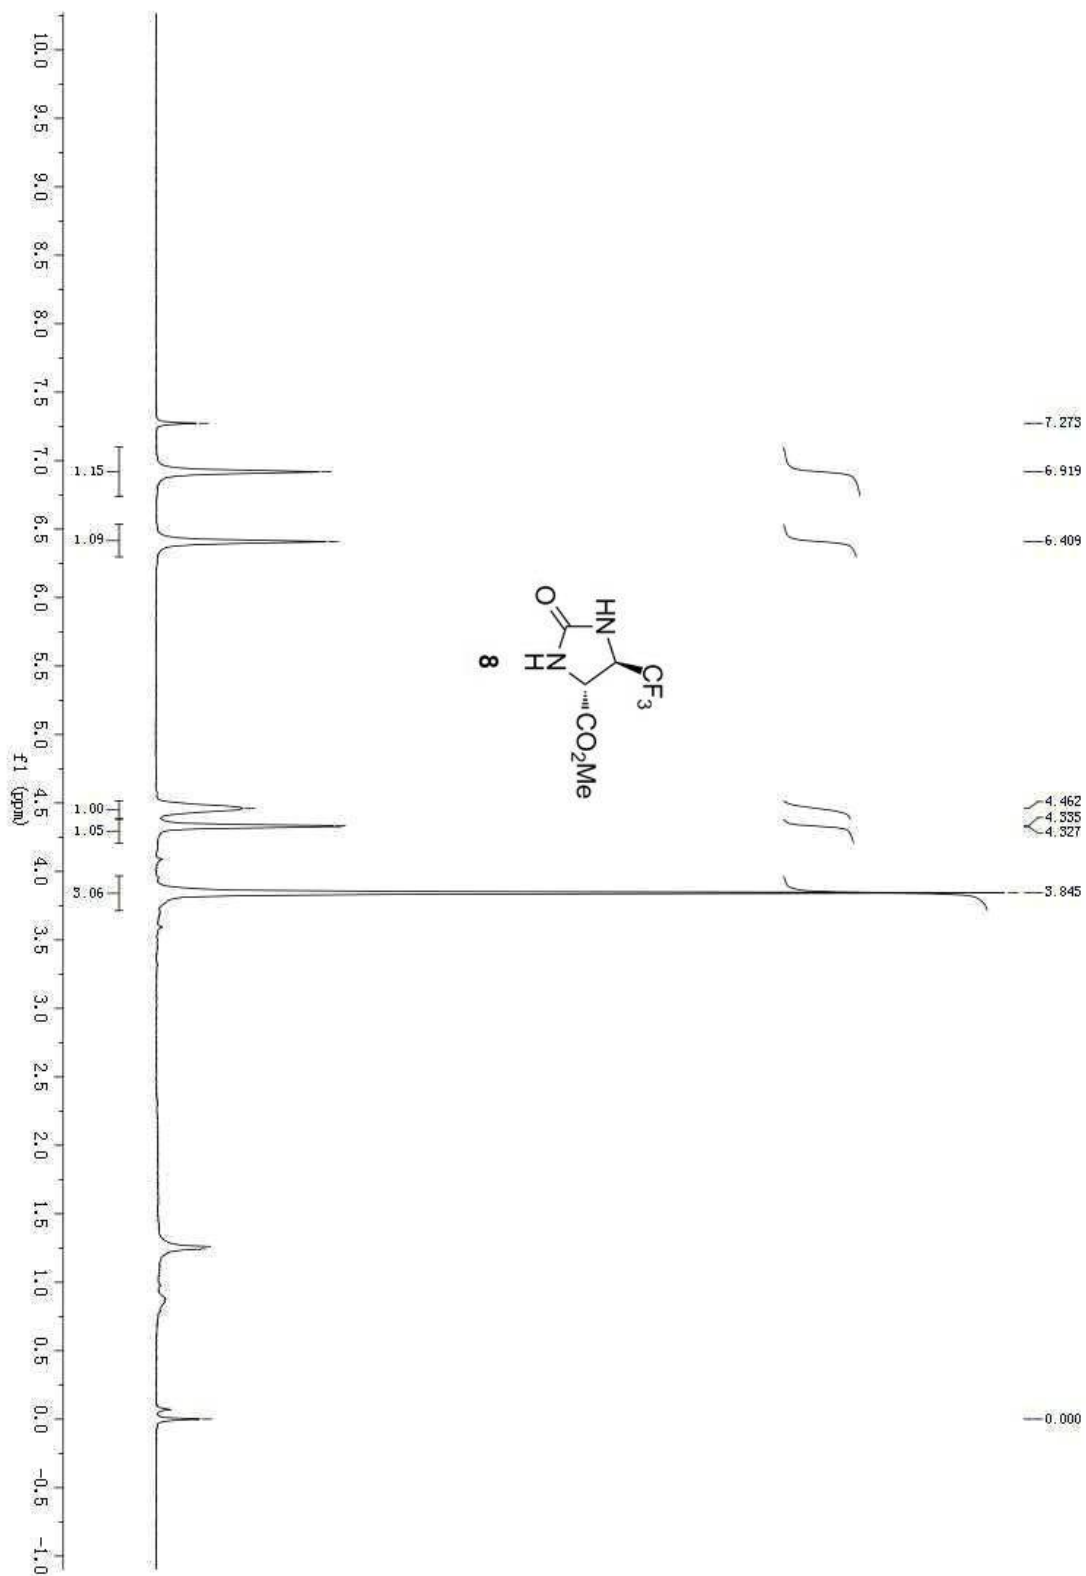

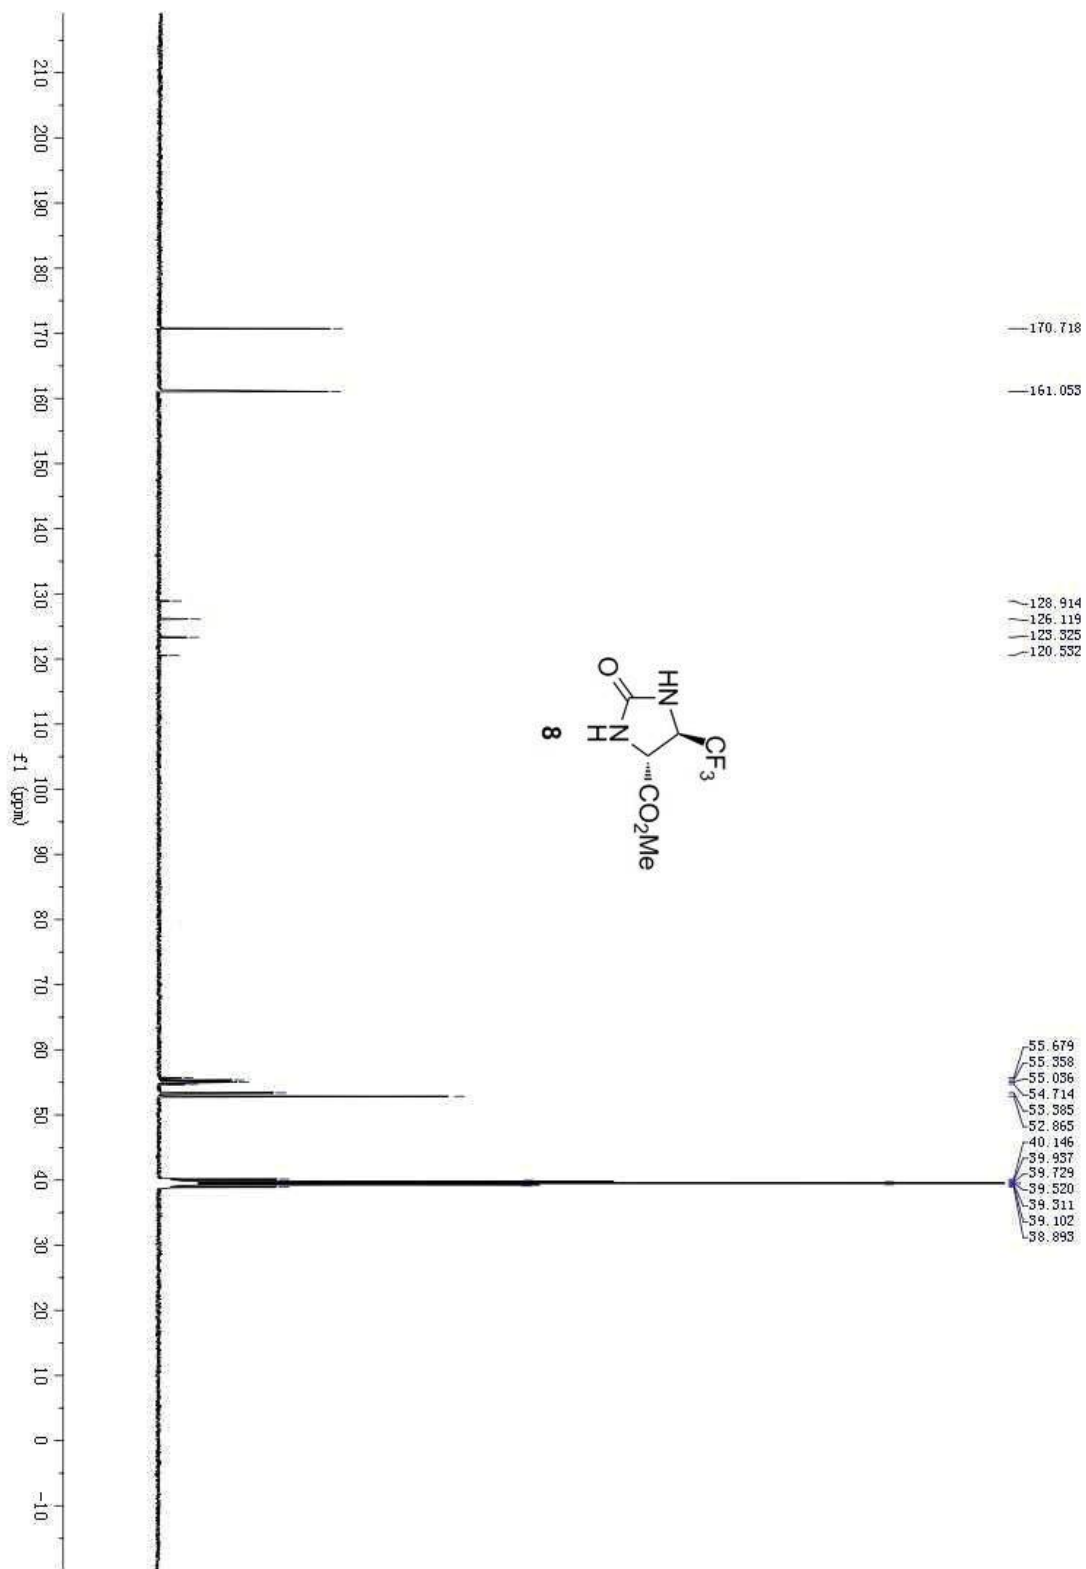

## XII. HPLC Chromatograms

Data File D:\LC\DATA\LQH\LQH-6-118\LQH-6-118C-2 2012-04-10 19-09-24\023-0201.D  
Sample Name: LQH-6-118C-2

```
=====
Acq. Operator   : LQH                      Seq. Line :    2
Acq. Instrument : Instrument 1              Location  : Vial 23
Injection Date  : 4/10/2012 7:22:08 PM      Inj       :    1
                                           Inj Volume: 5 µl
Acq. Method     : D:\LC\201201\LQH\LQH-6-118\LQH-6-118C-2 2012-04-10 19-09-24\ADH-10-90-
                  10ML-220NM-30MIN.M
Last changed    : 11/9/2011 12:13:31 PM by THL
Analysis Method : D:\LC\DATA\LQH\LQH-6-118\LQH-6-118C-2 2012-04-10 19-09-24\023-0201.D\
                  D.A.M (ADH-10-90-10ML-220NM-30MIN.M)
Last changed    : 7/9/2012 8:40:44 PM by LJ
                  (modified after loading)
=====
```

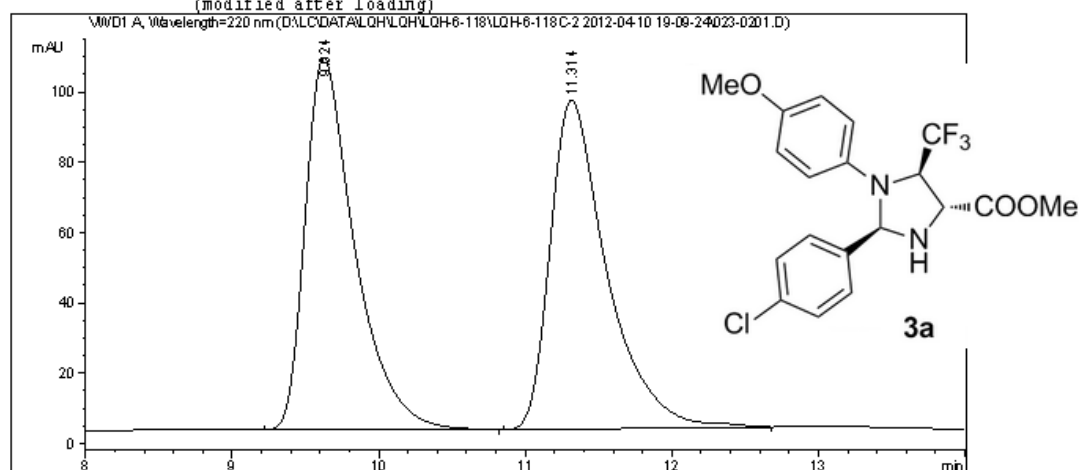

### Area Percent Report

```
Sorted By      : Signal
Multiplier     : 1.0000
Dilution       : 1.0000
Use Multiplier & Dilution Factor with ISTDs
```

Signal 1: VWD1 A, Wavelength=220 nm

| Peak # | RetTime [min] | Type | Width [min] | Area mAU   | Height [mAU] | Area %  |
|--------|---------------|------|-------------|------------|--------------|---------|
| 1      | 9.624         | BB   | 0.3499      | 2491.14551 | 105.98347    | 49.7242 |
| 2      | 11.314        | BB   | 0.3998      | 2518.77734 | 93.60684     | 50.2758 |

Totals : 5009.92285 199.59032

```
=====
*** End of Report ***
```

Instrument 1 7/9/2012 8:40:50 PM LJ

Page 1 of 1













Data File D:\LC\DATA\LQH\LQH-7-14\LQH-7-14A 2012-03-30 18-49-25\065-0201.D  
Sample Name: LQH-7-14A

=====

|                 |                        |            |           |
|-----------------|------------------------|------------|-----------|
| Acq. Operator   | : LQH                  | Seq. Line  | : 2       |
| Acq. Instrument | : Instrument 1         | Location   | : Vial 65 |
| Injection Date  | : 3/30/2012 7:01:25 PM | Inj        | : 1       |
|                 |                        | Inj Volume | : 5 µl    |

Acq. Method : D:\LC\201201\LQH\LQH-7-14\LQH-7-14A 2012-03-30 18-49-25\ASH-10-90-10ML-220NM.M

Last changed : 3/30/2012 7:23:42 PM by LQH  
(modified after loading)

Analysis Method : D:\LC\DATA\LQH\LQH-7-14\LQH-7-14A 2012-03-30 18-49-25\065-0201.D\DA.M  
(ASH-10-90-10ML-220NM.M)

Last changed : 9/6/2012 10:53:24 AM by thl  
(modified after loading)

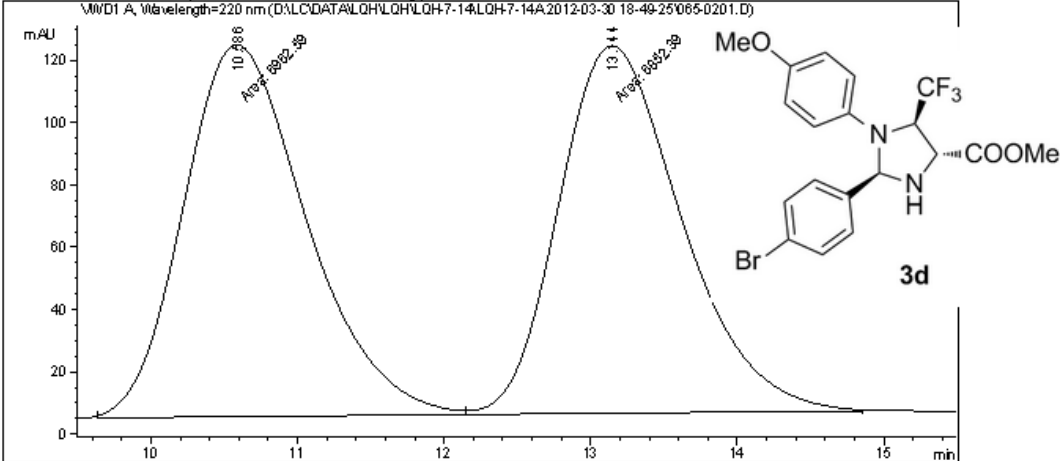

=====  
Area Percent Report  
=====

Sorted By : Signal  
Multiplier : 1.0000  
Dilution : 1.0000  
Use Multiplier & Dilution Factor with ISTDs

Signal 1: VMD1 A, Wavelength=220 nm

| Peak # | RetTime [min] | Type | Width [min] | Area mAU   | Height [mAU] | Area %  |
|--------|---------------|------|-------------|------------|--------------|---------|
| 1      | 10.586        | FM   | 0.9719      | 6962.59375 | 119.40109    | 50.3989 |
| 2      | 13.144        | MF   | 0.9682      | 6852.38574 | 117.95641    | 49.6011 |

Totals : 1.38150e4 237.35750

=====  
\*\*\* End of Report \*\*\*

Data File D:\LC\DATA\LQH\LQH-7-11-13-15\LQH-7-11-13-15 2012-04-19 19-33-38\098-0401.D  
Sample Name: LQH-7-15A

=====

|                 |                        |            |           |
|-----------------|------------------------|------------|-----------|
| Acq. Operator   | : LQH                  | Seq. Line  | : 4       |
| Acq. Instrument | : Instrument 1         | Location   | : Vial 98 |
| Injection Date  | : 4/19/2012 8:54:52 PM | Inj        | : 1       |
|                 |                        | Inj Volume | : 5 µl    |

Acq. Method : D:\LC\DATA\LQH\LQH-7-11-13-15\LQH-7-11-13-15 2012-04-19 19-33-38\ASH-10-90-1ML-220NM-25MIN.M  
Last changed : 9/10/2011 12:27:52 PM by LTL  
Analysis Method : D:\LC\DATA\LQH\LQH-7-11-13-15\LQH-7-11-13-15 2012-04-19 19-33-38\098-0401.D\DA.M (ASH-10-90-1ML-220NM-25MIN.M)  
Last changed : 9/6/2012 10:25:07 AM by thl  
(modified after loading)

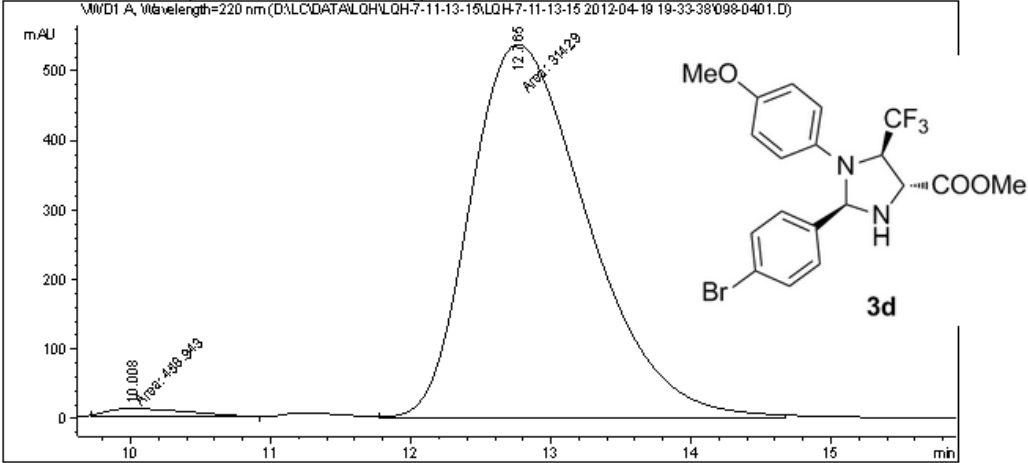

=====  
Area Percent Report  
=====

Sorted By : Signal  
Multiplier : 1.0000  
Dilution : 1.0000  
Use Multiplier & Dilution Factor with ISTDs

Signal 1: VWD1 A, Wavelength=220 nm

| Peak # | RetTime [min] | Type | Width [min] | Area mAU  | Height [mAU] | Area %  |
|--------|---------------|------|-------------|-----------|--------------|---------|
| 1      | 10.008        | FM   | 0.6702      | 458.94275 | 11.41303     | 1.4392  |
| 2      | 12.765        | MF   | 0.9743      | 3.14290e4 | 537.61847    | 98.5608 |

Totals : 3.18879e4 549.03150

=====  
\*\*\* End of Report \*\*\*



Data File D:\LC\DATA\LQH\LQH-7-13\LQH-7-13 2012-03-29 22-03-31\063-0301.D  
Sample Name: LQH-7-13B

=====

|                 |                         |            |           |
|-----------------|-------------------------|------------|-----------|
| Acq. Operator   | : LQH                   | Seq. Line  | : 3       |
| Acq. Instrument | : Instrument 1          | Location   | : Vial 63 |
| Injection Date  | : 3/29/2012 10:37:33 PM | Inj        | : 1       |
|                 |                         | Inj Volume | : 5 µl    |

Acq. Method : D:\LC\201201\LQH\LQH-7-13\LQH-7-13 2012-03-29 22-03-31\ASH-10-90-10ML-220NM-20MIN.M

Last changed : 8/29/2011 8:17:27 PM by LTL

Analysis Method : D:\LC\DATA\LQH\LQH-7-13\LQH-7-13 2012-03-29 22-03-31\063-0301.D\DA.M (ASH-10-90-10ML-220NM-20MIN.M)

Last changed : 4/19/2012 2:39:10 PM by THL  
(modified after loading)

Method Info : ASH-50-50-1ML-254NM-50MIN

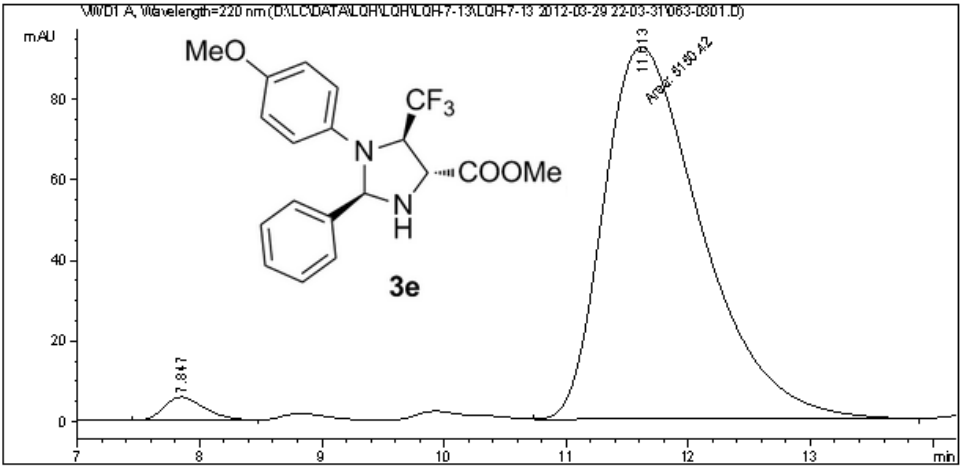

=====  
Area Percent Report  
=====

Sorted By : Signal  
Multiplier : 1.0000  
Dilution : 1.0000  
Use Multiplier & Dilution Factor with ISTDs

Signal 1: VWD1 A, Wavelength=220 nm

| Peak # | RetTime [min] | Type | Width [min] | Area mAU   | Height [mAU] | Area %  |
|--------|---------------|------|-------------|------------|--------------|---------|
| 1      | 7.847         | BV   | 0.3574      | 136.32626  | 5.79601      | 2.5786  |
| 2      | 11.613        | MM   | 0.9294      | 5150.42383 | 92.36421     | 97.4214 |

Totals : 5286.75009 98.16022

=====  
\*\*\* End of Report \*\*\*

Instrument 1 4/19/2012 2:39:14 PM THL

Page 1 of 1









Data File D:\LC\DATA\LQH\LQH-7-13\LQH-7-13 2012-03-29 22-03-31\062-0201.D  
Sample Name: LQH-7-13A

=====

|                 |                         |            |           |
|-----------------|-------------------------|------------|-----------|
| Acq. Operator   | : LQH                   | Seq. Line  | : 2       |
| Acq. Instrument | : Instrument 1          | Location   | : Vial 62 |
| Injection Date  | : 3/29/2012 10:16:11 PM | Inj        | : 1       |
|                 |                         | Inj Volume | : 5 µl    |

Acq. Method : D:\LC\201201\LQH\LQH-7-13\LQH-7-13 2012-03-29 22-03-31\ASH-10-90-10ML-220NM-20MIN.M

Last changed : 8/29/2011 8:17:27 PM by LTL

Analysis Method : D:\LC\DATA\LQH\LQH-7-13\LQH-7-13 2012-03-29 22-03-31\062-0201.D\DA.M (ASH-10-90-10ML-220NM-20MIN.M)

Last changed : 5/5/2012 4:19:16 PM by lqh  
(modified after loading)

Method Info : ASH-50-50-1ML-254NM-50MIN

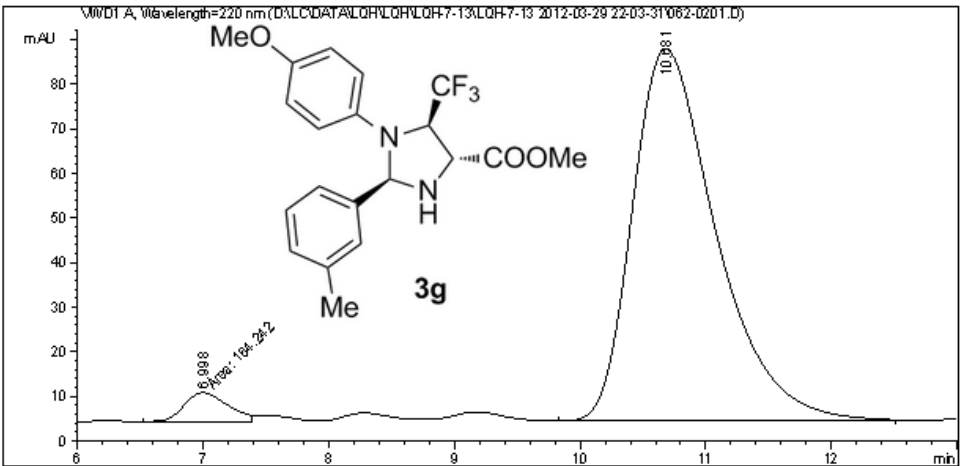

=====

Area Percent Report

=====

Sorted By : Signal  
Multiplier : 1.0000  
Dilution : 1.0000  
Use Multiplier & Dilution Factor with ISTDs

Signal 1: WVD1 A, Wavelength=220 nm

| Peak # | RetTime [min] | Type | Width [min] | Area mAU   | Height [mAU] | Area %  |
|--------|---------------|------|-------------|------------|--------------|---------|
| 1      | 6.998         | MF   | 0.4128      | 164.24181  | 6.63117      | 4.0823  |
| 2      | 10.681        | VB   | 0.7027      | 3859.04077 | 83.42413     | 95.9177 |

Totals : 4023.28258 90.05529

=====

\*\*\* End of Report \*\*\*

=====







Data File D:\LC\DATA\LQH\LQH-7-7\LQH-7-7AE 2012-03-28 18-39-22\071-0201.D  
Sample Name: LQH-7-7A

=====

|                 |                                                                                                       |            |           |
|-----------------|-------------------------------------------------------------------------------------------------------|------------|-----------|
| Acq. Operator   | : LQH                                                                                                 | Seq. Line  | : 2       |
| Acq. Instrument | : Instrument 1                                                                                        | Location   | : Vial 71 |
| Injection Date  | : 3/28/2012 6:51:59 PM                                                                                | Inj        | : 1       |
|                 |                                                                                                       | Inj Volume | : 5 µl    |
| Acq. Method     | : D:\LC\201201\LQH\LQH-7-7\LQH-7-7AE 2012-03-28 18-39-22\ASH-10-90-10ML-220NM-20MIN.M                 |            |           |
| Last changed    | : 8/29/2011 8:17:27 PM by LTL                                                                         |            |           |
| Analysis Method | : D:\LC\DATA\LQH\LQH-7-7\LQH-7-7AE 2012-03-28 18-39-22\071-0201.D\DA.M (ASH-10-90-10ML-220NM-20MIN.M) |            |           |
| Last changed    | : 4/27/2012 11:39:14 AM by LQH (modified after loading)                                               |            |           |
| Method Info     | : ASH-50-50-1ML-254NM-50MIN                                                                           |            |           |

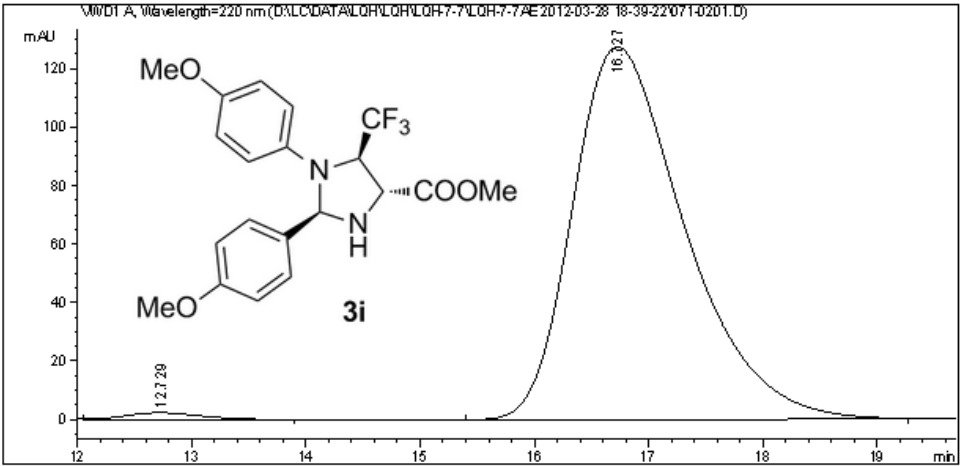

=====  
Area Percent Report  
=====

Sorted By : Signal  
Multiplier : 1.0000  
Dilution : 1.0000  
Use Multiplier & Dilution Factor with ISTDs

Signal 1: WWD1 A, Wavelength=220 nm

| Peak # | RetTime [min] | Type | Width [min] | Area mAU   | Height [mAU] | Area %  |
|--------|---------------|------|-------------|------------|--------------|---------|
| 1      | 12.729        | VB   | 0.6835      | 118.02040  | 2.44702      | 1.3372  |
| 2      | 16.727        | BB   | 1.0437      | 8708.21582 | 127.37482    | 98.6628 |

Totals : 8826.23622 129.82184

=====  
\*\*\* End of Report \*\*\*



























Data File D:\LC\DATA\LQH\LQH-8-33\LQH-8-33A 2012-06-21 10-11-38\099-0101.D  
Sample Name: LQH-8-33A

=====

|                 |                         |            |           |
|-----------------|-------------------------|------------|-----------|
| Acq. Operator   | : LQH                   | Seq. Line  | : 1       |
| Acq. Instrument | : Instrument 1          | Location   | : Vial 99 |
| Injection Date  | : 6/21/2012 10:13:17 AM | Inj        | : 1       |
|                 |                         | Inj Volume | : 5 µl    |

Acq. Method : D:\LC\DATA\LQH\LQH-8-33\LQH-8-33A 2012-06-21 10-11-38\ASH-10-90-10ML-220NM-20MIN.M

Last changed : 8/29/2011 8:17:27 PM by LTL

Analysis Method : D:\LC\DATA\LQH\LQH-8-33\LQH-8-33A 2012-06-21 10-11-38\099-0101.D\DA.M (ASH-10-90-10ML-220NM-20MIN.M)

Last changed : 6/26/2012 5:02:45 PM by YDC  
(modified after loading)

Method Info : ASH-50-50-1ML-254NM-50MIN

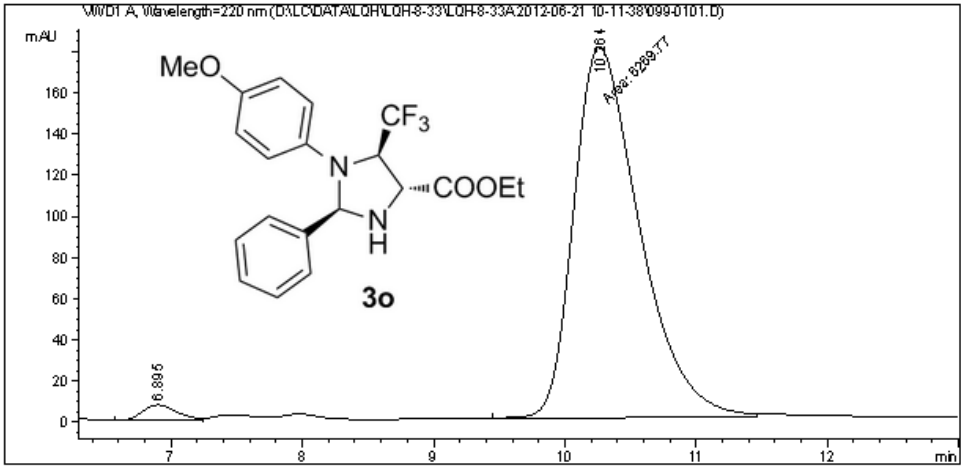

=====  
Area Percent Report  
=====

Sorted By : Signal  
Multiplier : 1.0000  
Dilution : 1.0000  
Use Multiplier & Dilution Factor with ISTDs

Signal 1: VWD1 A, Wavelength=220 nm

| Peak # | RetTime [min] | Type | Width [min] | Area mAU   | Height [mAU] | Area %  |
|--------|---------------|------|-------------|------------|--------------|---------|
| 1      | 6.895         | W    | 0.2870      | 139.97893  | 7.52152      | 2.1838  |
| 2      | 10.264        | MF   | 0.5801      | 6269.77197 | 180.12724    | 97.8162 |

Totals : 6409.75090 187.64876

=====  
\*\*\* End of Report \*\*\*

Instrument 1 6/26/2012 5:02:52 PM YDC

Page 1 of 1

Data File D:\LC\DATA\LQH\LQH-8-20\LQH-8-20 2012-06-15 16-44-39\081-0201.D  
Sample Name: LQH-8-20

=====

|                 |                        |            |           |
|-----------------|------------------------|------------|-----------|
| Acq. Operator   | : LQH                  | Seq. Line  | : 2       |
| Acq. Instrument | : Instrument 1         | Location   | : Vial 81 |
| Injection Date  | : 6/15/2012 4:56:33 PM | Inj        | : 1       |
|                 |                        | Inj Volume | : 5 µl    |

Acq. Method : D:\LC\DATA\LQH\LQH-8-20\LQH-8-20 2012-06-15 16-44-39\ASH-10-90-10ML-220NM.M

Last changed : 8/27/2011 9:19:02 AM by LQH

Analysis Method : D:\LC\DATA\LQH\LQH-8-20\LQH-8-20 2012-06-15 16-44-39\081-0201.D\DA.M (ASH-10-90-10ML-220NM.M)

Last changed : 6/26/2012 4:47:04 PM by YDC  
(modified after loading)

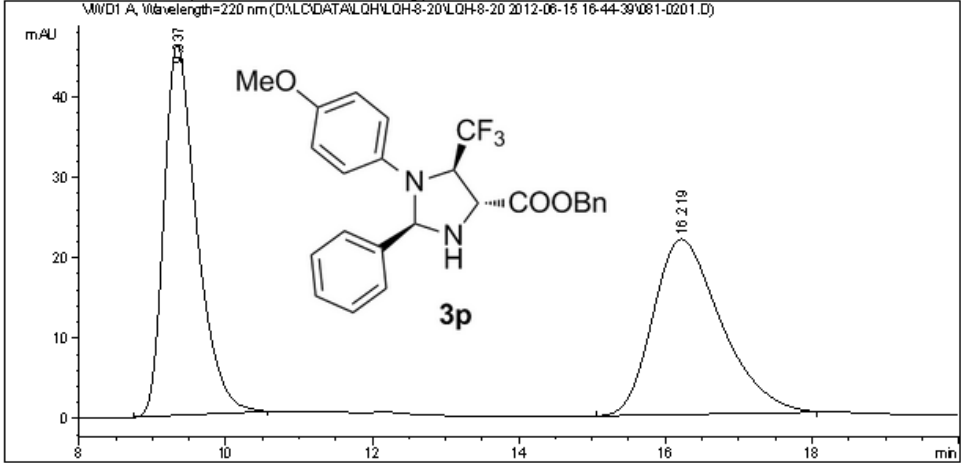

=====  
Area Percent Report  
=====

Sorted By : Signal  
Multiplier : 1.0000  
Dilution : 1.0000  
Use Multiplier & Dilution Factor with ISTDs

Signal 1: VMD1 A, Wavelength=220 nm

| Peak # | RetTime [min] | Type | Width [min] | Area mAU   | Height [mAU] | Area %  |
|--------|---------------|------|-------------|------------|--------------|---------|
| 1      | 9.337         | BB   | 0.4697      | 1438.75793 | 46.19259     | 50.4188 |
| 2      | 16.219        | BB   | 0.9622      | 1414.85535 | 21.80758     | 49.5812 |

Totals : 2853.61328 68.00017

=====  
\*\*\* End of Report \*\*\*











Data File D:\LC\DATA\LQH\LQH-8-9598102\LQH-8-9598102-2 2012-08-30 10-54-43\084-0201.D  
Sample Name: LQH-8-95

=====

|                 |                         |            |           |
|-----------------|-------------------------|------------|-----------|
| Acq. Operator   | : THL                   | Seq. Line  | : 2       |
| Acq. Instrument | : Instrument 1          | Location   | : Vial 84 |
| Injection Date  | : 8/30/2012 11:07:01 AM | Inj        | : 1       |
|                 |                         | Inj Volume | : 5 µl    |

Acq. Method : D:\LC\DATA\LQH\LQH-8-9598102\LQH-8-9598102-2 2012-08-30 10-54-43\ASH-10-90-10ML-220NM-20MIN.M

Last changed : 8/29/2011 8:17:27 PM by LTL

Analysis Method : D:\LC\DATA\LQH\LQH-8-9598102\LQH-8-9598102-2 2012-08-30 10-54-43\084-0201.D\DA.M (ASH-10-90-10ML-220NM-20MIN.M)

Last changed : 8/30/2012 7:27:59 PM by THL  
(modified after loading)

Method Info : ASH-50-50-1ML-254NM-50MIN

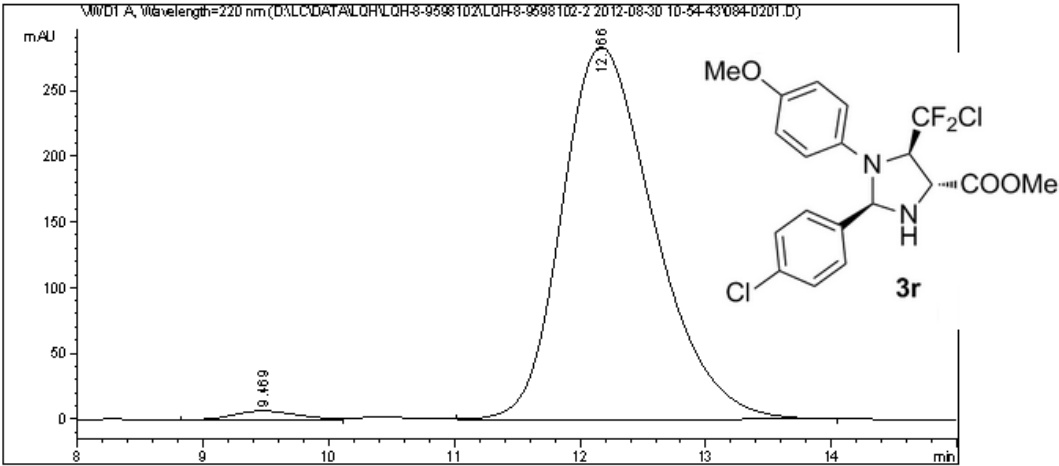

=====

Area Percent Report

=====

Sorted By : Signal

Multiplier : 1.0000

Dilution : 1.0000

Use Multiplier & Dilution Factor with ISTDs

Signal 1: WWD1 A, Wavelength=220 nm

| Peak # | RetTime [min] | Type | Width [min] | Area mAU  | Height [mAU] | Area %  |
|--------|---------------|------|-------------|-----------|--------------|---------|
| 1      | 9.469         | BV   | 0.5502      | 244.45634 | 6.78117      | 1.6567  |
| 2      | 12.166        | VB   | 0.7905      | 1.45110e4 | 283.63538    | 98.3433 |

Totals : 1.47555e4 290.41655

=====

\*\*\* End of Report \*\*\*



Data File D:\LC\DATA\LQH\LQH-7-52\LQH-7-52 2012-04-16 13-36-24\078-0301.D  
Sample Name: LQH-7-52B

```
=====
Acq. Operator   : LQH                      Seq. Line :    3
Acq. Instrument : Instrument 1              Location  : Vial 78
Injection Date  : 4/16/2012 2:15:44 PM      Inj       :    1
                                           Inj Volume: 5 µl
Acq. Method     : D:\LC\DATA\LQH\LQH-7-52\LQH-7-52 2012-04-16 13-36-24\ASH-10-90-10ML-220NM.
                                           M
Last changed    : 4/16/2012 2:14:37 PM by LQH
                  (modified after loading)
Analysis Method : D:\LC\DATA\LQH\LQH-7-52\LQH-7-52 2012-04-16 13-36-24\078-0301.D\DA.M (ASH-
                  10-90-10ML-220NM.M)
Last changed    : 5/5/2012 4:38:02 PM by lqh
                  (modified after loading)
=====
```

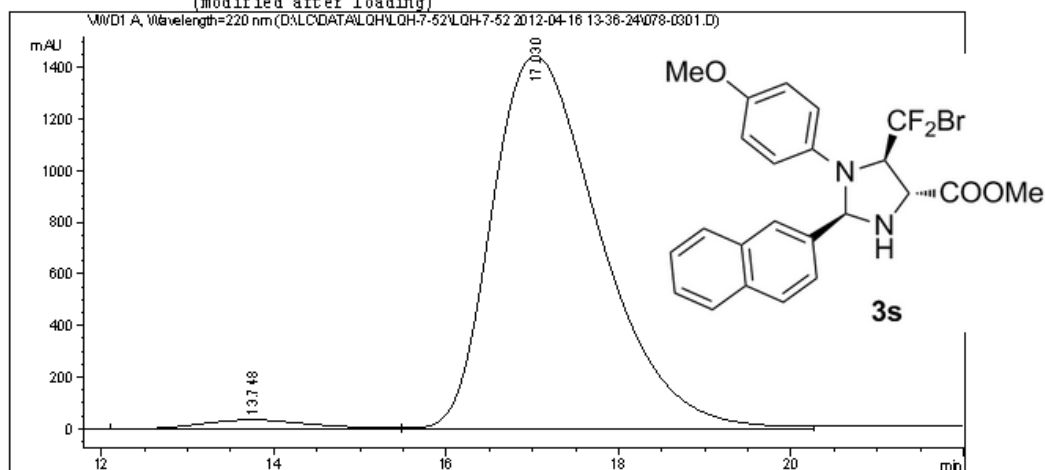

Area Percent Report

```
=====
Sorted By      : Signal
Multiplier     : 1.0000
Dilution       : 1.0000
Use Multiplier & Dilution Factor with ISTDs
=====
```

Signal 1: VWD1 A, Wavelength=220 nm

| Peak # | RetTime [min] | Type | Width [min] | Area mAU   | Height [mAU] | Area %  |
|--------|---------------|------|-------------|------------|--------------|---------|
| 1      | 13.748        | BV   | 1.3413      | 3222.45190 | 35.80244     | 2.4929  |
| 2      | 17.030        | VB   | 1.3514      | 1.26045e5  | 1446.62573   | 97.5071 |

Totals : 1.29268e5 1482.42817

\*\*\* End of Report \*\*\*

Instrument 1 5/5/2012 4:38:08 PM lqh

Page 1 of 1



Data File D:\LC\DATA\LQH\LQH-8-9598102\LQH-8-9598102-2 2012-08-30 10-54-43\086-0301.D  
Sample Name: LQH-8-102

=====

|                 |                         |            |           |
|-----------------|-------------------------|------------|-----------|
| Acq. Operator   | : THL                   | Seq. Line  | : 3       |
| Acq. Instrument | : Instrument 1          | Location   | : Vial 86 |
| Injection Date  | : 8/30/2012 11:28:41 AM | Inj        | : 1       |
|                 |                         | Inj Volume | : 5 µl    |

Acq. Method : D:\LC\DATA\LQH\LQH-8-9598102\LQH-8-9598102-2 2012-08-30 10-54-43\ASH-10-90-10ML-220NM-20MIN.M

Last changed : 8/29/2011 8:17:27 PM by LTL

Analysis Method : D:\LC\DATA\LQH\LQH-8-9598102\LQH-8-9598102-2 2012-08-30 10-54-43\086-0301.D\DA.M (ASH-10-90-10ML-220NM-20MIN.M)

Last changed : 8/30/2012 7:35:21 PM by THL  
(modified after loading)

Method Info : ASH-50-50-1ML-254NM-50MIN

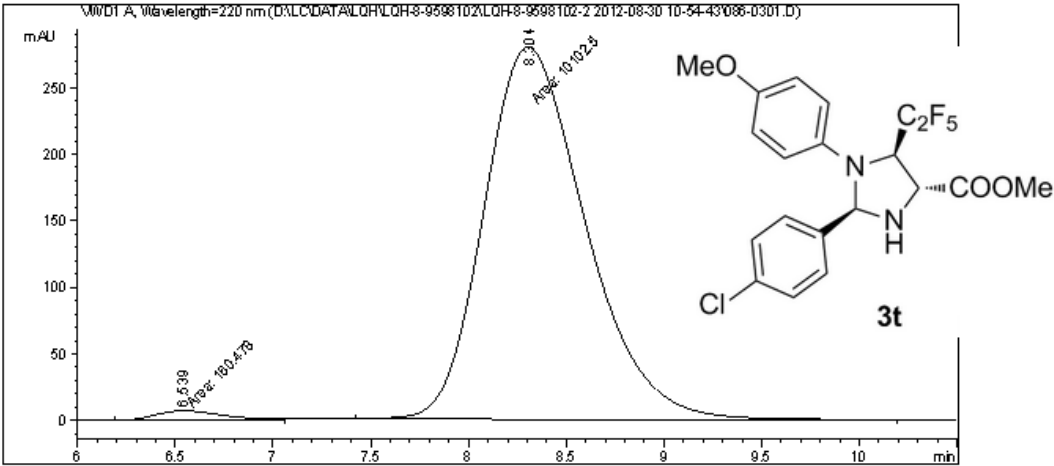

=====  
Area Percent Report  
=====

Sorted By : Signal  
Multiplier : 1.0000  
Dilution : 1.0000  
Use Multiplier & Dilution Factor with ISTDs

Signal 1: WWD1 A, Wavelength=220 nm

| Peak # | RetTime [min] | Type | Width [min] | Area mAU  | Height [mAU] | Area %  |
|--------|---------------|------|-------------|-----------|--------------|---------|
| 1      | 6.539         | PM   | 0.3826      | 160.47826 | 6.99069      | 1.5637  |
| 2      | 8.304         | PM   | 0.6017      | 1.01025e4 | 279.85178    | 98.4363 |

Totals : 1.02630e4 286.84246

=====  
\*\*\* End of Report \*\*\*









Data File D:\LC\DATA\LQH\LQH-8-107\LQH-8-107-ODH 2012-09-01 08-58-57\093-0301.D  
Sample Name: LQH-8-107

=====

|                 |                       |            |           |
|-----------------|-----------------------|------------|-----------|
| Acq. Operator   | : LQH                 | Seq. Line  | : 3       |
| Acq. Instrument | : Instrument 1        | Location   | : Vial 93 |
| Injection Date  | : 9/1/2012 9:33:04 AM | Inj        | : 1       |
|                 |                       | Inj Volume | : 5 µl    |

Acq. Method : D:\LC\DATA\LQH\LQH-8-107\LQH-8-107-ODH 2012-09-01 08-58-57\ODH-10-90-10ML-220NM-10MIN.M

Last changed : 9/1/2012 8:55:50 AM by LQH

Analysis Method : D:\LC\DATA\LQH\LQH-8-107\LQH-8-107-ODH 2012-09-01 08-58-57\093-0301.D\DA.M (ODH-10-90-10ML-220NM-10MIN.M)

Last changed : 9/4/2012 1:04:11 PM by FX  
(modified after loading)

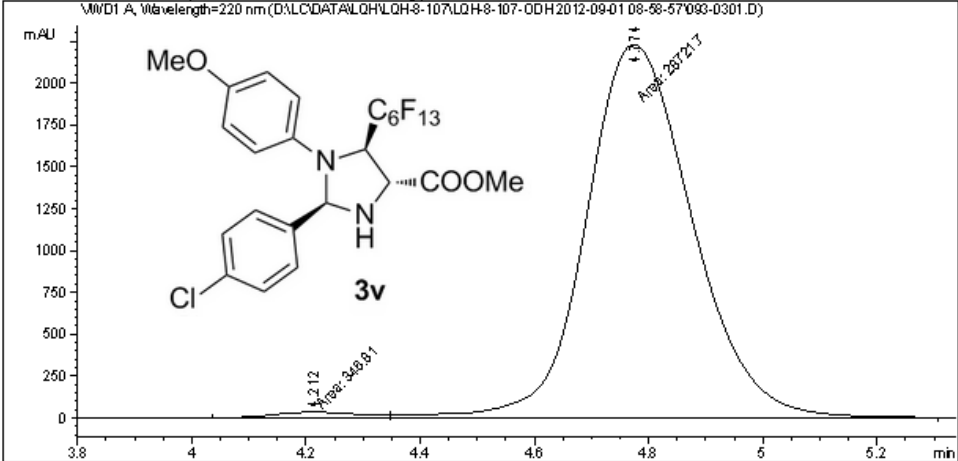

=====  
Area Percent Report  
=====

Sorted By : Signal  
Multiplier : 1.0000  
Dilution : 1.0000  
Use Multiplier & Dilution Factor with ISTDs

Signal 1: VWD1 A, Wavelength=220 nm

| Peak # | RetTime [min] | Type | Width [min] | Area mAU  | Height [mAU] | Area %  |
|--------|---------------|------|-------------|-----------|--------------|---------|
| 1      | 4.212         | MF   | 0.1721      | 346.81021 | 33.58257     | 1.1931  |
| 2      | 4.774         | FM   | 0.2146      | 2.87217e4 | 2230.45142   | 98.8069 |

Totals : 2.90686e4 2264.03399

=====  
\*\*\* End of Report \*\*\*















Data File D:\LC\DATA\LQH\LQH-8-55\LQH-8-55B-1 2012-07-05 11-24-29\075-0201.D  
Sample Name: LQH-8-55B

=====

|                 |                                                                                                  |            |           |
|-----------------|--------------------------------------------------------------------------------------------------|------------|-----------|
| Acq. Operator   | : HZL                                                                                            | Seq. Line  | : 2       |
| Acq. Instrument | : Instrument 1                                                                                   | Location   | : Vial 75 |
| Injection Date  | : 7/5/2012 11:37:11 AM                                                                           | Inj        | : 1       |
|                 |                                                                                                  | Inj Volume | : 5 µl    |
| Acq. Method     | : D:\LC\DATA\LQH\LQH-8-55\LQH-8-55B-1 2012-07-05 11-24-29\ADH-5-95-10ML-220NM.M                  |            |           |
| Last changed    | : 9/8/2011 7:40:46 PM by LTL                                                                     |            |           |
| Analysis Method | : D:\LC\DATA\LQH\LQH-8-55\LQH-8-55B-1 2012-07-05 11-24-29\075-0201.D\A.M (ADH-5-95-10ML-220NM.M) |            |           |
| Last changed    | : 7/24/2012 6:19:18 PM by lqh<br>(modified after loading)                                        |            |           |

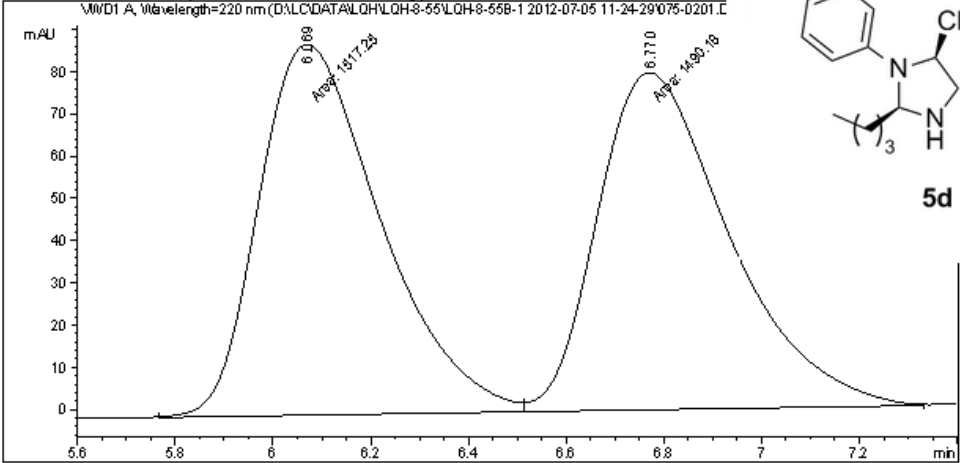

=====  
Area Percent Report  
=====

Sorted By : Signal  
Multiplier : 1.0000  
Dilution : 1.0000  
Use Multiplier & Dilution Factor with ISTDs

Signal 1: VWD1 A, Wavelength=220 nm

| Peak # | RetTime [min] | Type | Width [min] | Area mAU *s | Height [mAU] | Area %  |
|--------|---------------|------|-------------|-------------|--------------|---------|
| 1      | 6.069         | MF   | 0.2881      | 1517.25439  | 87.78556     | 50.4501 |
| 2      | 6.770         | FM   | 0.3112      | 1490.18420  | 79.80413     | 49.5499 |

Totals : 3007.43860 167.58969

=====  
\*\*\* End of Report \*\*\*









Data File D:\LC\DATA\LQH\LQH-8-36\LQH-8-36 2012-06-22 08-32-57\087-0201.D  
Sample Name: LQH-8-36B

=====

|                 |                        |            |           |
|-----------------|------------------------|------------|-----------|
| Acq. Operator   | : LQH                  | Seq. Line  | : 2       |
| Acq. Instrument | : Instrument 1         | Location   | : Vial 87 |
| Injection Date  | : 6/22/2012 8:45:38 AM | Inj        | : 1       |
|                 |                        | Inj Volume | : 5 µl    |

Acq. Method : D:\LC\DATA\LQH\LQH-8-36\LQH-8-36 2012-06-22 08-32-57\ADH-10-90-10ML-220NM-20MIN.M

Last changed : 8/29/2011 8:14:57 PM by LTL

Analysis Method : D:\LC\DATA\LQH\LQH-8-36\LQH-8-36 2012-06-22 08-32-57\087-0201.D\DA.M (ADH-10-90-10ML-220NM-20MIN.M)

Last changed : 6/26/2012 5:16:07 PM by YDC  
(modified after loading)

Method Info : ASH-50-50-1ML-254NM-50MIN

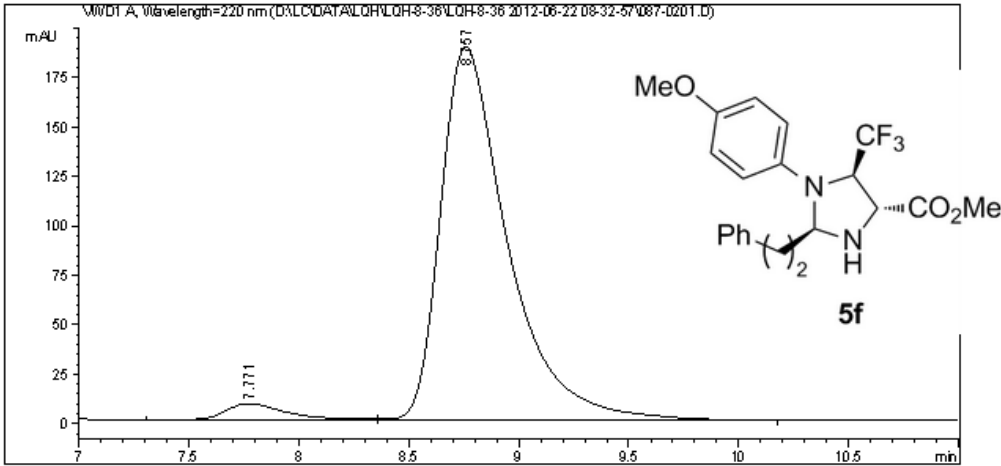

=====

Area Percent Report

=====

Sorted By : Signal

Multiplier : 1.0000

Dilution : 1.0000

Use Multiplier & Dilution Factor with ISTDs

Signal 1: VMD1 A, Wavelength=220 nm

| Peak # | RetTime [min] | Type | Width [min] | Area mAU   | Height [mAU] | Area %  |
|--------|---------------|------|-------------|------------|--------------|---------|
| 1      | 7.771         | BV   | 0.2959      | 170.97664  | 8.44586      | 4.0805  |
| 2      | 8.757         | VB   | 0.3152      | 4019.11279 | 188.87428    | 95.9195 |

Totals : 4190.08943 197.32014

=====

\*\*\* End of Report \*\*\*

Data File D:\LC\DATA\LQH\LQH-7-93\LQH-7-93 2012-05-16 19-01-36\082-0201.D  
Sample Name: LQH-7-93

=====

|                 |                        |            |           |
|-----------------|------------------------|------------|-----------|
| Acq. Operator   | : LQH                  | Seq. Line  | : 2       |
| Acq. Instrument | : Instrument 1         | Location   | : Vial 82 |
| Injection Date  | : 5/16/2012 7:13:22 PM | Inj        | : 1       |
|                 |                        | Inj Volume | : 5 µl    |

Acq. Method : D:\LC\DATA\LQH\LQH-7-93\LQH-7-93 2012-05-16 19-01-36\ASH-10-90-10ML-220NM.M

Last changed : 8/27/2011 9:19:02 AM by LQH

Analysis Method : D:\LC\DATA\LQH\LQH-7-93\LQH-7-93 2012-05-16 19-01-36\082-0201.D\DA.M (ASH-10-90-10ML-220NM.M)

Last changed : 6/26/2012 6:03:01 PM by YDC  
(modified after loading)

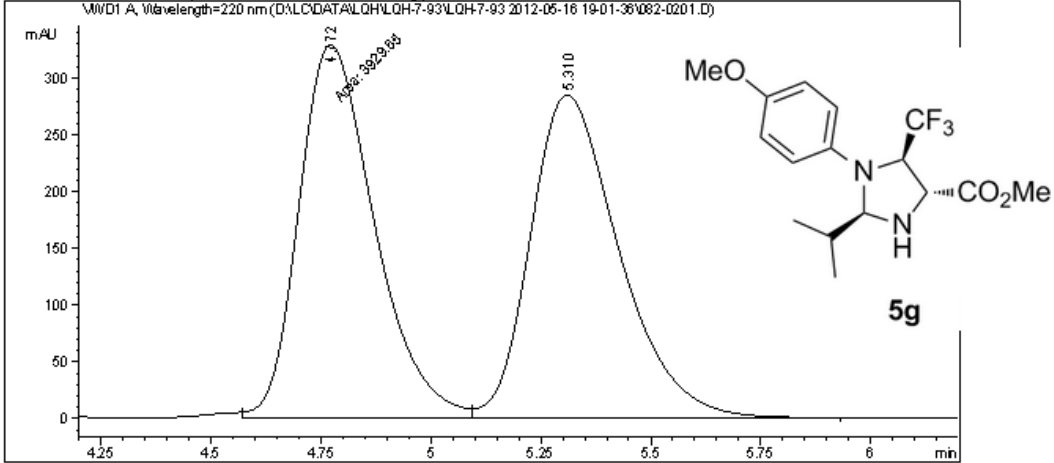

=====  
Area Percent Report  
=====

Sorted By : Signal  
Multiplier : 1.0000  
Dilution : 1.0000  
Use Multiplier & Dilution Factor with ISTDs

Signal 1: VMD1 A, Wavelength=220 nm

| Peak # | RetTime [min] | Type | Width [min] | Area mAU   | Height [mAU] | Area %  |
|--------|---------------|------|-------------|------------|--------------|---------|
| 1      | 4.772         | FM   | 0.1988      | 3929.65063 | 329.40140    | 49.6393 |
| 2      | 5.310         | VB   | 0.2142      | 3986.76709 | 284.93958    | 50.3607 |

Totals : 7916.41772 614.34097

=====  
\*\*\* End of Report \*\*\*













Data File D:\LC\DATA\LQH\LQH-7-73\LQH-7-73 2012-05-05 08-35-24\094-0201.D  
Sample Name: LQH-7-73

=====

|                 |                       |            |           |
|-----------------|-----------------------|------------|-----------|
| Acq. Operator   | : lqh                 | Seq. Line  | : 2       |
| Acq. Instrument | : Instrument 1        | Location   | : Vial 94 |
| Injection Date  | : 5/5/2012 8:47:17 AM | Inj        | : 1       |
|                 |                       | Inj Volume | : 5 µl    |

Acq. Method : D:\LC\DATA\LQH\LQH-7-73\LQH-7-73 2012-05-05 08-35-24\ASH-10-90-10ML-220NM.M

Last changed : 8/27/2011 9:19:02 AM by LQH

Analysis Method : D:\LC\DATA\LQH\LQH-7-73\LQH-7-73 2012-05-05 08-35-24\094-0201.D\DA.M (ASH-10-90-10ML-220NM.M)

Last changed : 7/9/2012 11:04:22 PM by FX  
(modified after loading)

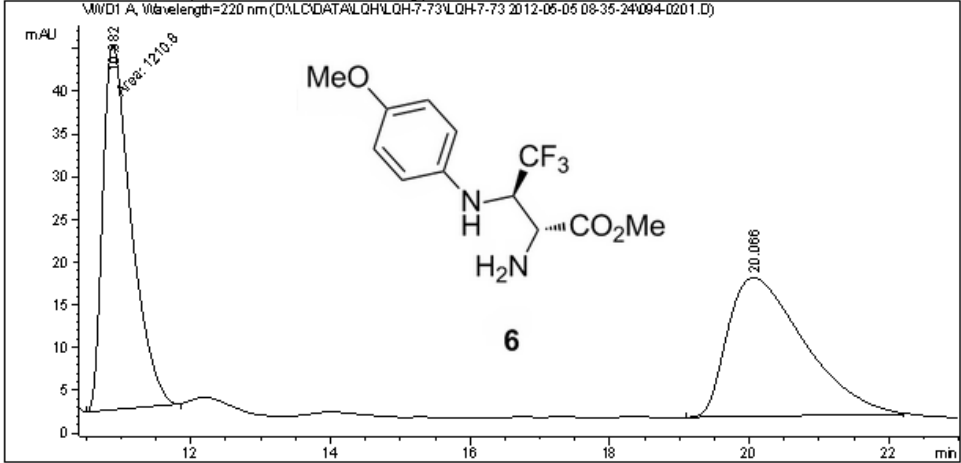

=====  
Area Percent Report  
=====

Sorted By : Signal  
Multiplier : 1.0000  
Dilution : 1.0000  
Use Multiplier & Dilution Factor with ISTDs

Signal 1: VMD1 A, Wavelength=220 nm

| Peak # | RetTime [min] | Type | Width [min] | Area mAU   | Height [mAU] | Area %  |
|--------|---------------|------|-------------|------------|--------------|---------|
| 1      | 10.882        | MM   | 0.4716      | 1210.79785 | 42.79110     | 49.3992 |
| 2      | 20.066        | BB   | 1.0730      | 1240.24780 | 16.21302     | 50.6008 |

Totals : 2451.04565 59.00412

=====  
\*\*\* End of Report \*\*\*









Data File D:\GC\LQH\DATA\LQH-10-43B\LQH-10-43B 2013-02-21 11-26-44\101F0101.D  
Sample Name: LQH-10-43B

=====

|                 |                                                                                |            |            |
|-----------------|--------------------------------------------------------------------------------|------------|------------|
| Acq. Operator   | : LQH                                                                          | Seq. Line  | : 1        |
| Acq. Instrument | : Instrument 2                                                                 | Location   | : Vial 101 |
| Injection Date  | : 21-Feb-13, 11:28:27                                                          | Inj        | : 1        |
|                 |                                                                                | Inj Volume | : 2 µl     |
| Acq. Method     | : D:\GC\LQH\DATA\LQH-10-43B\LQH-10-43B 2013-02-21 11-26-44\BETA-DEX325-1700C.M |            |            |
| Last changed    | : 2/21/2013 11:25:40 AM by LQH                                                 |            |            |
| Analysis Method | : D:\GC\DEF GC OFF.M                                                           |            |            |
| Last changed    | : 2/21/2013 12:04:24 PM by LQH                                                 |            |            |
|                 | (modified after loading)                                                       |            |            |

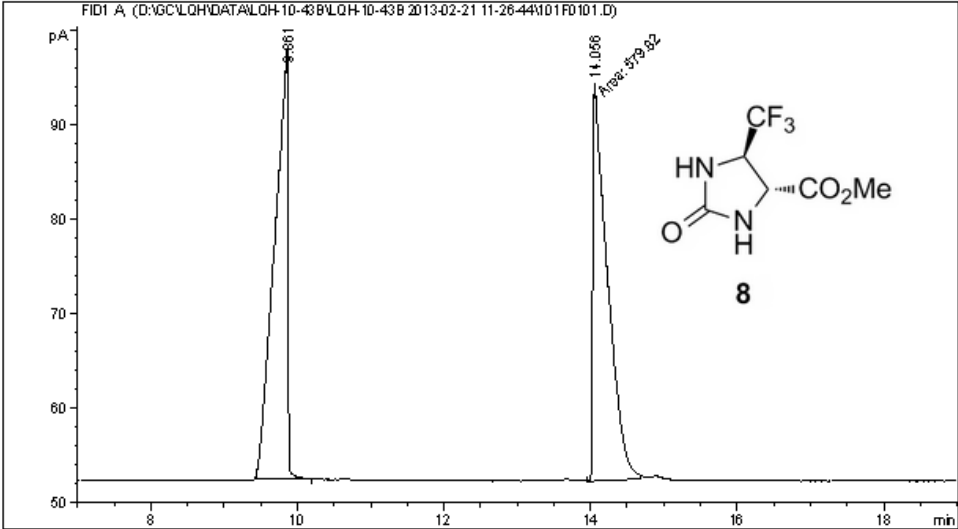

=====  
Area Percent Report  
=====

Sorted By : Signal  
Multiplier : 1.0000  
Dilution : 1.0000  
Use Multiplier & Dilution Factor with ISTDs

Signal 1: FID1 A,

| Peak # | RetTime [min] | Type | Width [min] | Area [pA*s] | Height [pA] | Area %   |
|--------|---------------|------|-------------|-------------|-------------|----------|
| 1      | 9.861         | BB   | 0.1546      | 581.82855   | 45.66846    | 50.08646 |
| 2      | 14.056        | MM   | 0.2295      | 579.81989   | 42.10339    | 49.91354 |

Totals : 1161.64844 87.77185

=====  
\*\*\* End of Report \*\*\*

Data File D:\GC\YHL\DATA\LQH-10-51\LQH-10-51 2013-02-28 22-00-35\105F0101.D  
Sample Name: LQH-10-51

=====

|                 |                       |            |            |
|-----------------|-----------------------|------------|------------|
| Acq. Operator   | : LQH                 | Seq. Line  | : 1        |
| Acq. Instrument | : Instrument 2        | Location   | : Vial 105 |
| Injection Date  | : 28-Feb-13, 22:02:18 | Inj        | : 1        |
|                 |                       | Inj Volume | : 2 µl     |

Acq. Method : D:\GC\YHL\DATA\LQH-10-51\LQH-10-51 2013-02-28 22-00-35\BETA-DEX325-1700C.M  
Last changed : 2/21/2013 11:25:40 AM by LQH  
Analysis Method : D:\GC\DEF GC OFF.M  
Last changed : 2/28/2013 10:24:32 PM by LQH  
(modified after loading)

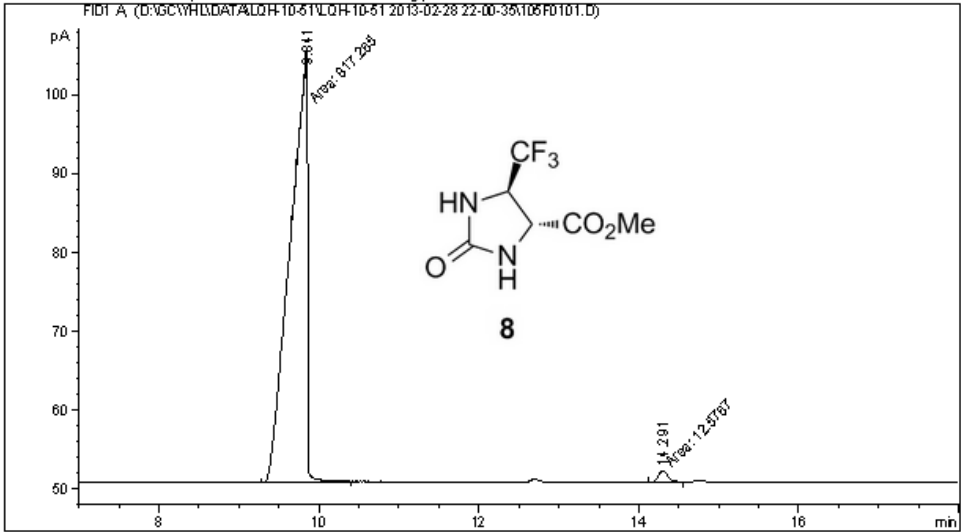

=====  
Area Percent Report  
=====

Sorted By : Signal  
Multiplier : 1.0000  
Dilution : 1.0000  
Use Multiplier & Dilution Factor with ISTDs

Signal 1: FID1 A,

| Peak # | RetTime [min] | Type | Width [min] | Area [pA*s] | Height [pA] | Area %   |
|--------|---------------|------|-------------|-------------|-------------|----------|
| 1      | 9.841         | MM   | 0.2480      | 817.26520   | 54.92947    | 98.48445 |
| 2      | 14.291        | MM   | 0.1375      | 12.57668    | 1.52396     | 1.51555  |

Totals : 829.84188 56.45343

=====  
\*\*\* End of Report \*\*\*
